# Supplementary material
Source: publisher figshare collection journal article supplement (https://acs.figshare.com/ndownloader/files/3943849)
Supplement: Supplementary file 1 [file 3943849]

# Sulfonyl fluorides as alternative to sulfonyl chlorides in parallel synthesis of aliphatic sulfonamides

*Andrey V. Bogolubsky,<sup>†</sup> Yurii S. Moroz,<sup>\*,†,‡</sup> Pavel K. Mykhailiuk,<sup>\*,†,§</sup> Sergey E. Pipko,<sup>‡</sup> Anzhelika I. Konovets,<sup>||</sup> Irina V. Sadkova,<sup>†,‡</sup> and Andrey Tolmachev<sup>†,‡</sup>*

<sup>†</sup>Enamine Ltd., 23 Matrosova str., Kyiv, 01103, Ukraine

<sup>‡</sup>ChemBioCenter, Kyiv National Taras Shevchenko University, 61 Chervonotkatska str., Kyiv, 02094, Ukraine

<sup>§</sup>Department of Chemistry, Kyiv National Taras Shevchenko University, 64 Volodymyrska str., Kyiv, 01601, Ukraine

<sup>||</sup>The Institute of High Technologies, Kyiv National Taras Shevchenko University, 4 Glushkov str., Building 5, Kyiv, 03187, Ukraine

|                                                                                                                             |    |
|-----------------------------------------------------------------------------------------------------------------------------|----|
| Figure S1. Parallel synthesis set-up. ....                                                                                  | 2  |
| Figure S2. List of sulfonamides synthesized from amines of subgroup Ia. ....                                                | 3  |
| Figure S3. List of sulfonamides synthesized from amines of subgroup Ib. ....                                                | 4  |
| Figure S4. List of sulfonamides synthesized from amines of subgroup Ic. ....                                                | 5  |
| Figure S5. List of sulfonamides synthesized from amines of group II. ....                                                   | 6  |
| Figure S6. List of sulfonamides synthesized from amines of group III. ....                                                  | 7  |
| Representative examples of the identified side products. ....                                                               | 8  |
| Comparison of LC-MS traces of the selected crude mixtures analyzed after completion of the synthesis (Figures S7-S21). .... | 9  |
| Comparison of NMR spectra of the selected crude mixtures analyzed after completion of the synthesis (Figures S17-S31). .... | 21 |
| Spectral data for the selected compounds. ....                                                                              | 31 |
| NMR spectra of the selected compounds. ....                                                                                 | 40 |

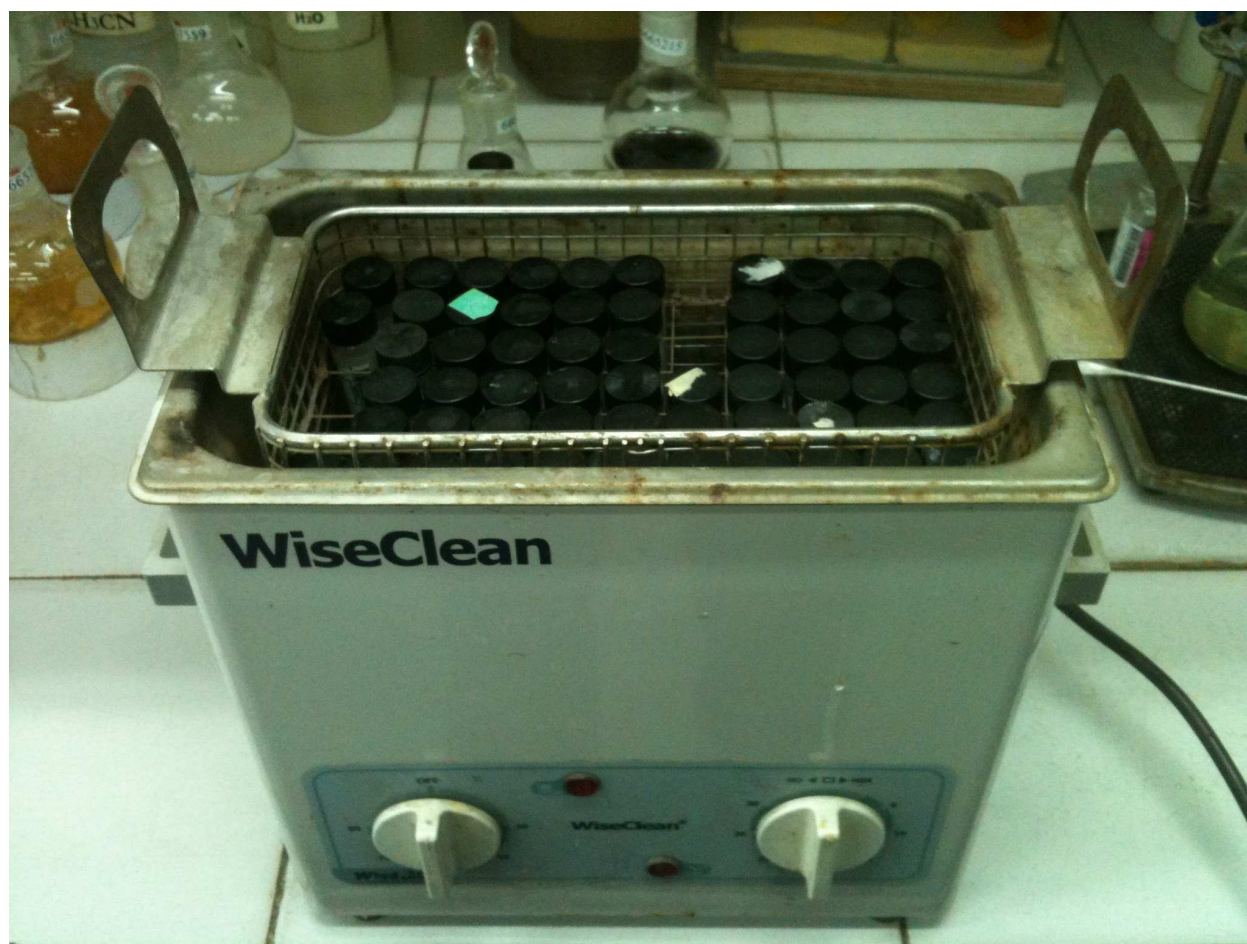

**Figure S1.** Parallel synthesis set-up.

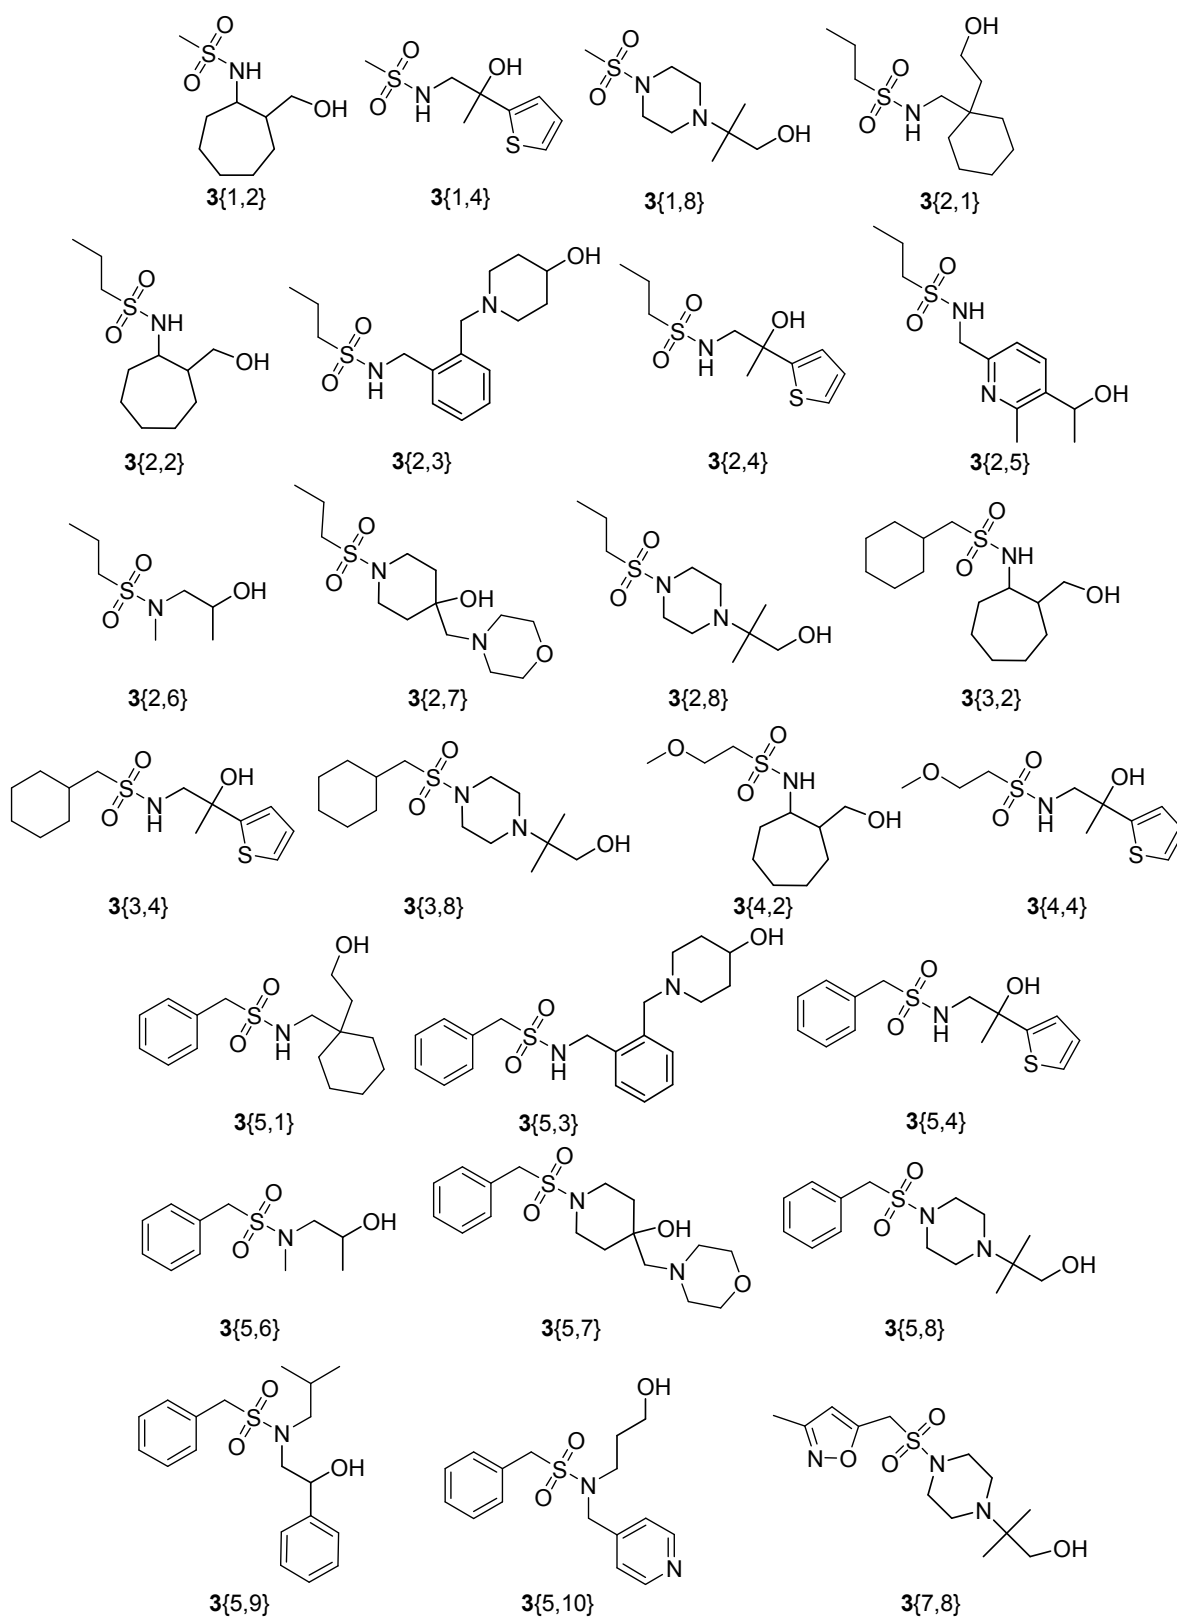

**Figure S2.** List of sulfonamides synthesized from amines of subgroup Ia.

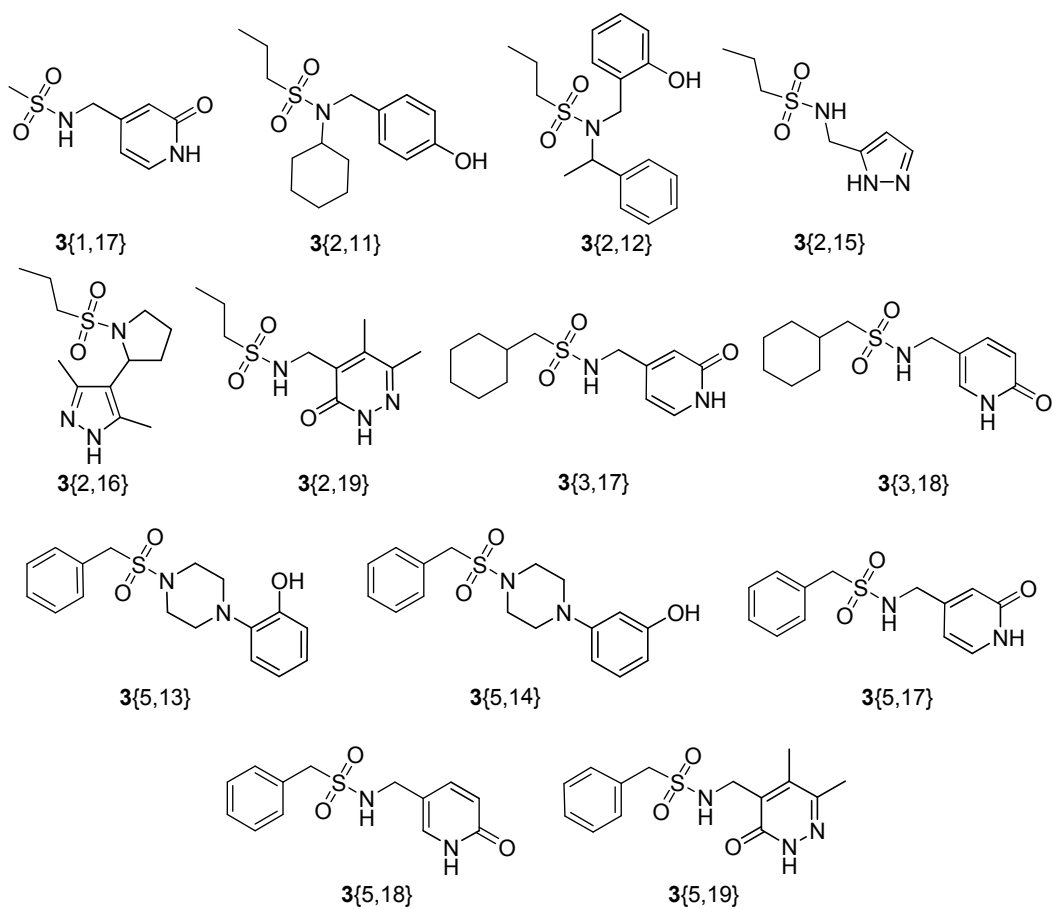

**Figure S3.** List of sulfonamides synthesized from amines of subgroup Ib.

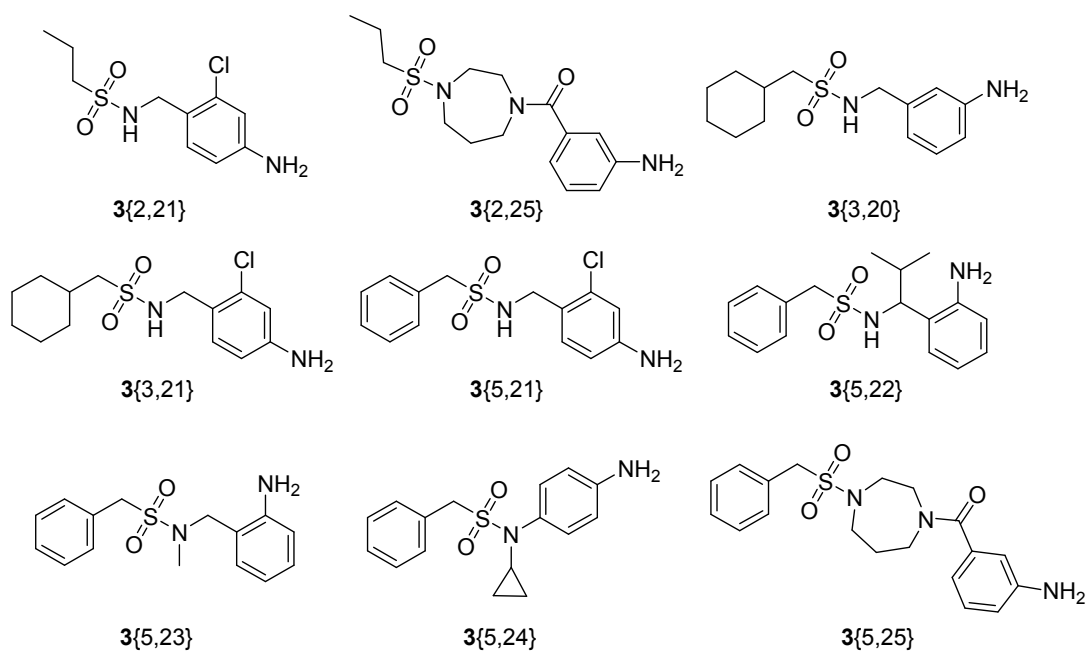

**Figure S4.** List of sulfonamides synthesized from amines of subgroup Ic.

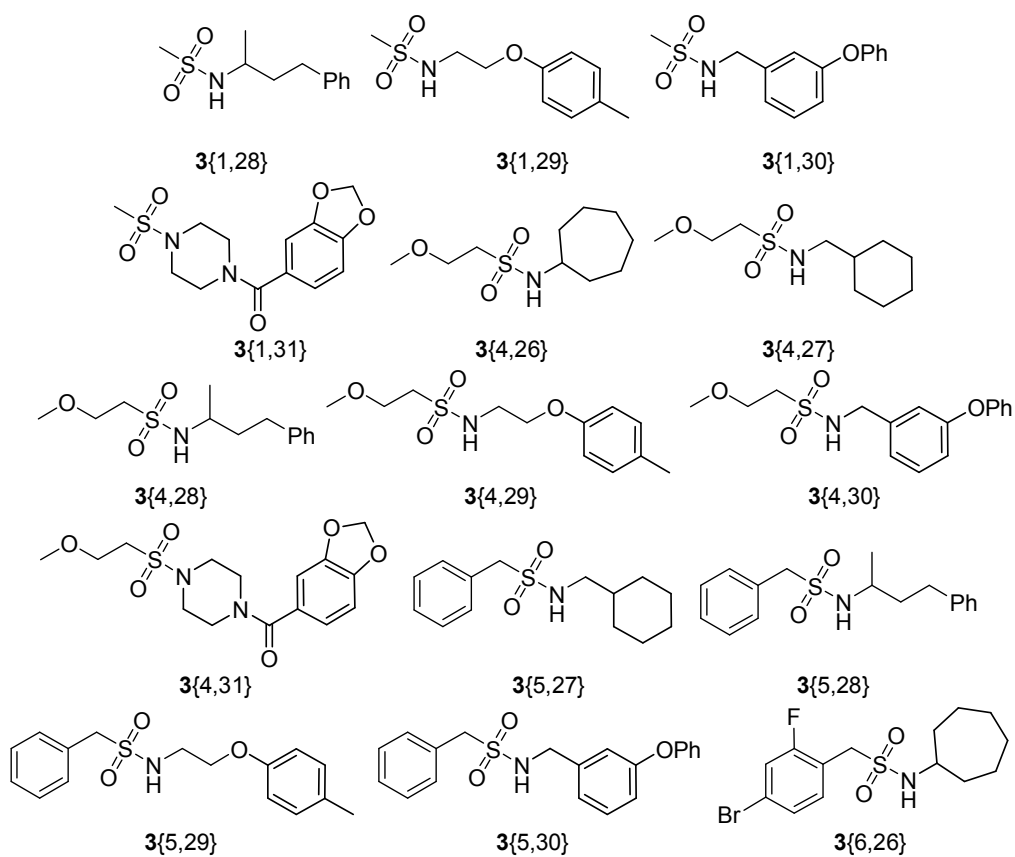

**Figure S5.** List of sulfonamides synthesized from amines of group II.

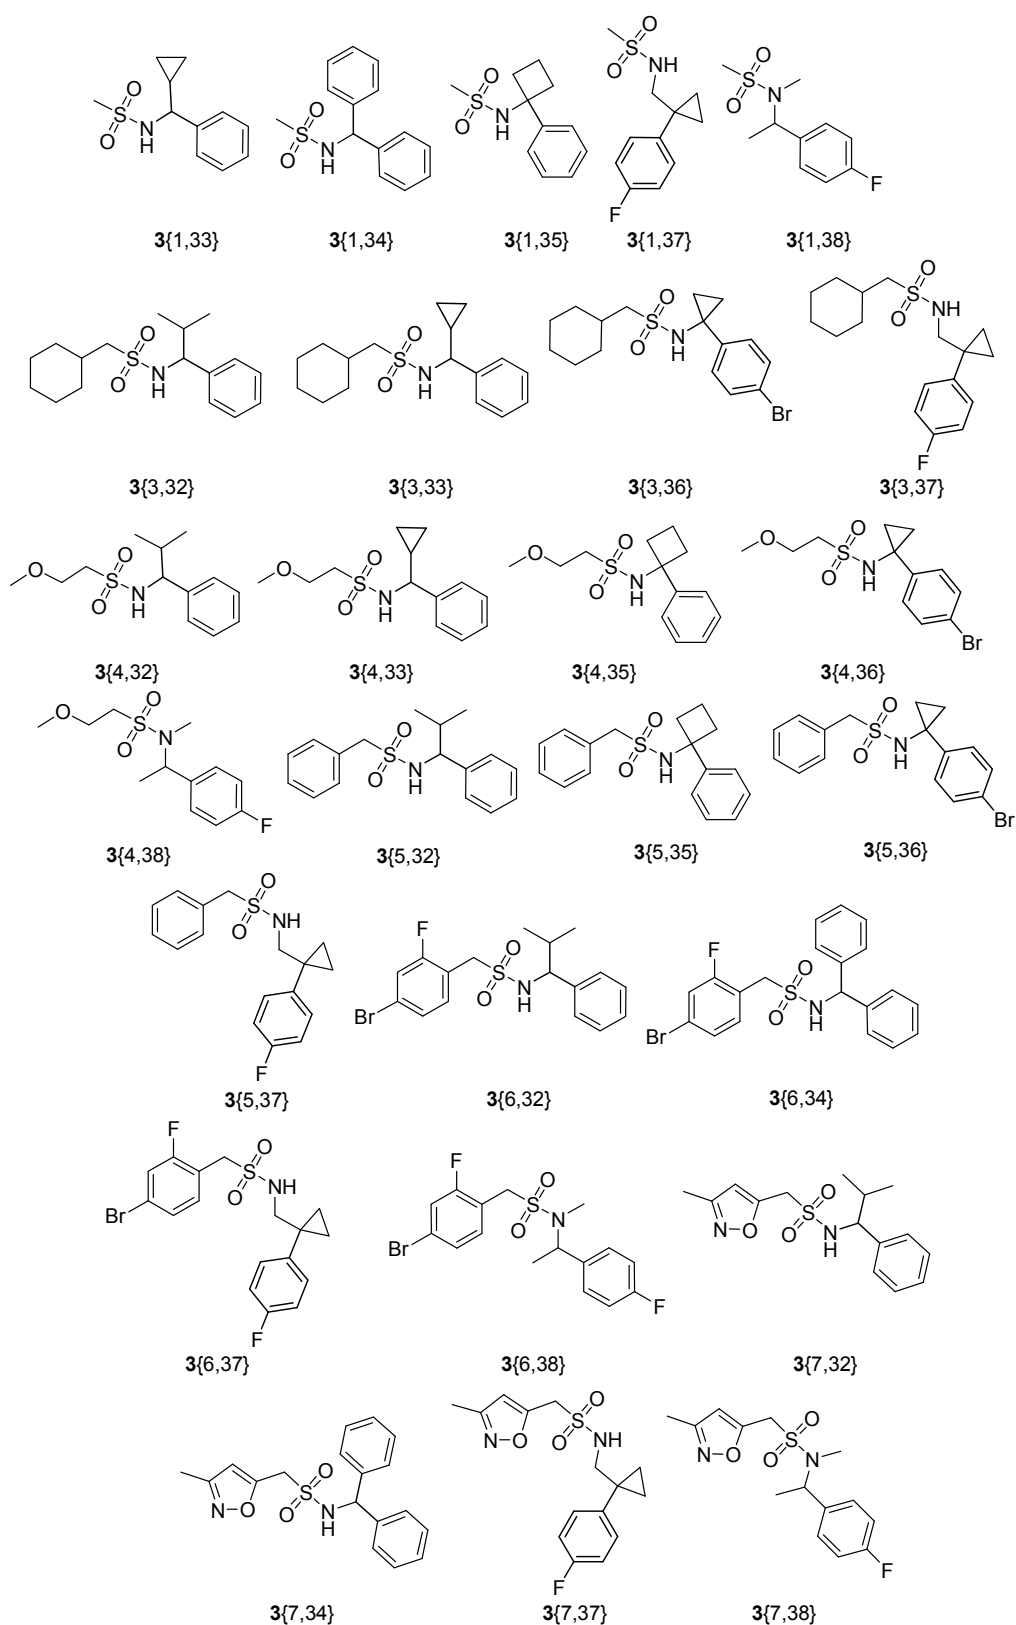

**Figure S6.** List of sulfonamides synthesized from amines of group **III**.

### Representative examples of the identified side products.

Compound **3**{2,1} (Figure S1).

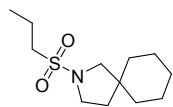

[2-Phenylmethanesulfonyl]-2-aza-spiro[4.5]decane

NMR spectrum is shown in Figure S28 (p. S20).

Compound **3**{3,4} (Figure S1).

Suggested structure

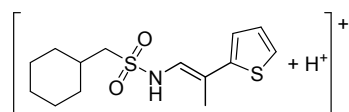

H<sub>2</sub>O-eliminated side product with  $m/z$   $[M+H]^+ = 300.1$ , Figure S10 (p. S10).

Compound **3**{2,11} (Figure S2).

Suggested structures

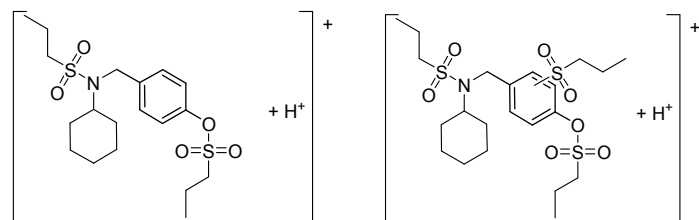

Di- and trisulfonylated side products with  $m/z$   $[M+H]^+ = 418.2$  and  $524.2$ , respectively, Figure S14 (p. S13).

Compound **3**{5,14} (Figure S2).

Suggested structure

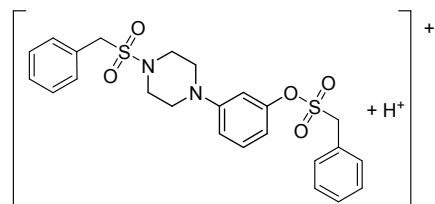

Disulfonylated side product with  $m/z$   $[M+H]^+ = 487.2$ , Figure S16 (p. S15).



Comparison of LC-MS traces of the selected crude mixtures analyzed after completion of the synthesis (Figures S7-S21).

**3{5a,1}**

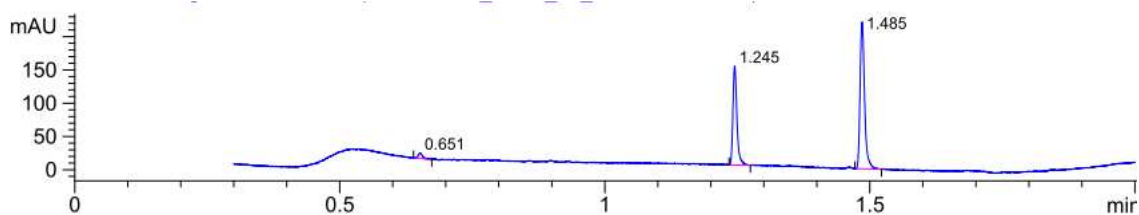

Peaks were assigned to the **product** (1.25 min, 37%), side product - [2-Phenylmethanesulfonyl-2-aza-spiro[4.5]decane (1.48 min, 61%).\*.\*

**3{5b,1}**

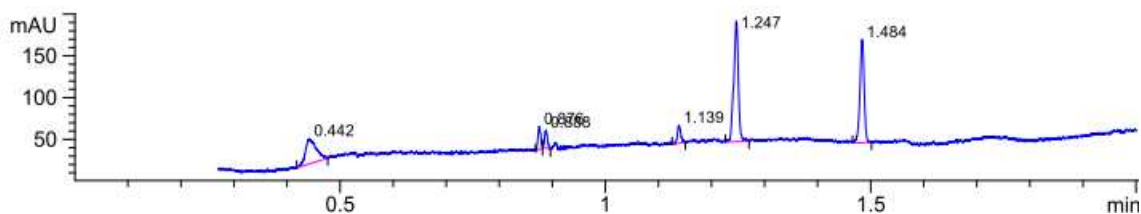

Peaks were assigned to the **product** (1.25 min, 39%), [5.6] bicyclo side product (1.48 min, 30%).\*.\*

**Figure S7**

**3{2a,3}**

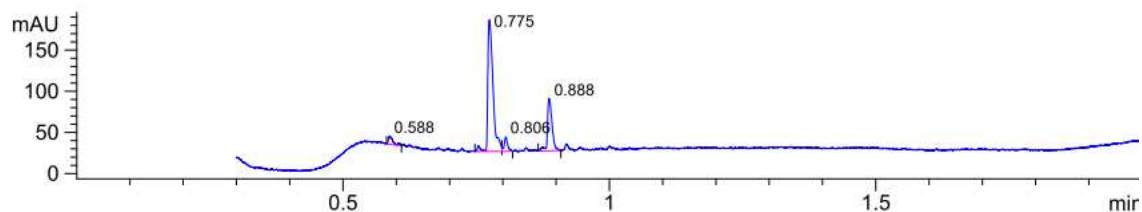

Peaks were assigned to the **product** (0.78 min, 67%), trisulfonylated side product (0.89 min, 24%).\*

**3{2b,3}**

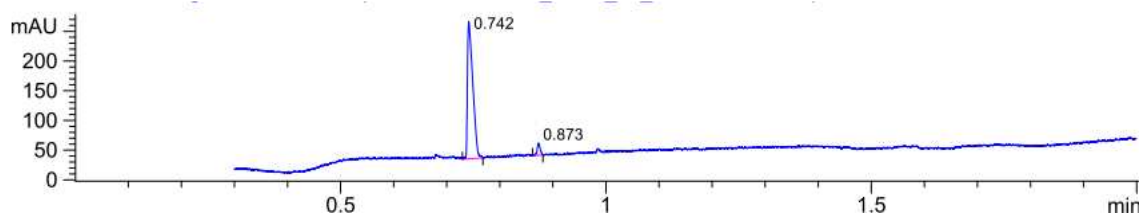

Peaks were assigned to the **product** (0.74 min, 95%), trisulfonylated side product (0.87 min, 5%).\*

**Figure S8**

\* - assignment is based on the MS data; \*\* - assignment is based on the NMR data.

**3{5a,3}**

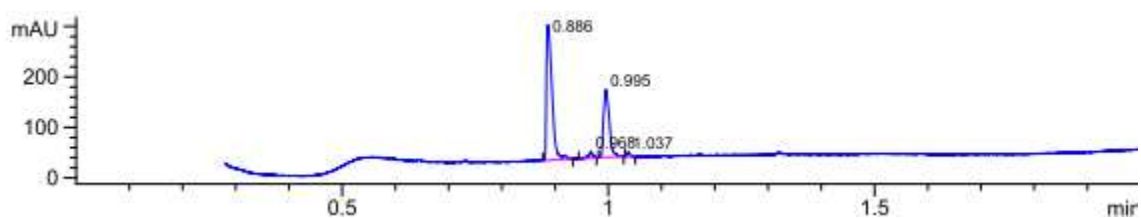

Peaks were assigned to the **product** (RT 0.89 min, 64%), trisulfonylated side product (1.0 min, 33%).\*

**3{5b,3}**

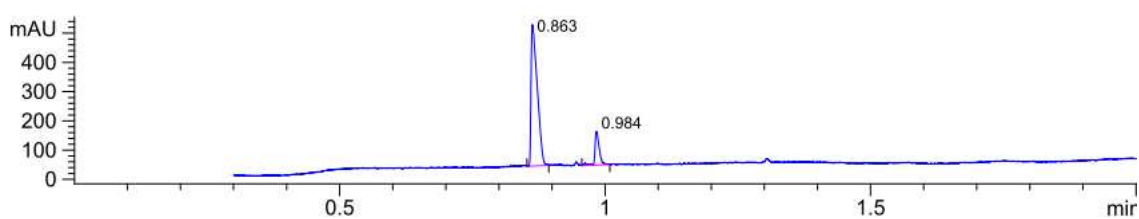

Peaks were assigned to the **product** (0.86 min, 86%), trisulfonylated side product (0.98 min, 14%).\*

**Figure S9**

\* - assignment is based on the MS data.

3{3a,4}

MaxPeak: 82.96%  
Ret\_Time: 1.442 min

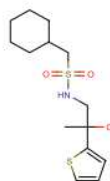

Mol Wt 317.47  
Exact Mass 317.14

| # | Time  | Area% |
|---|-------|-------|
| 1 | 1.442 | 82.96 |
| 2 | 1.687 | 17.04 |

6242367

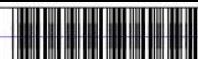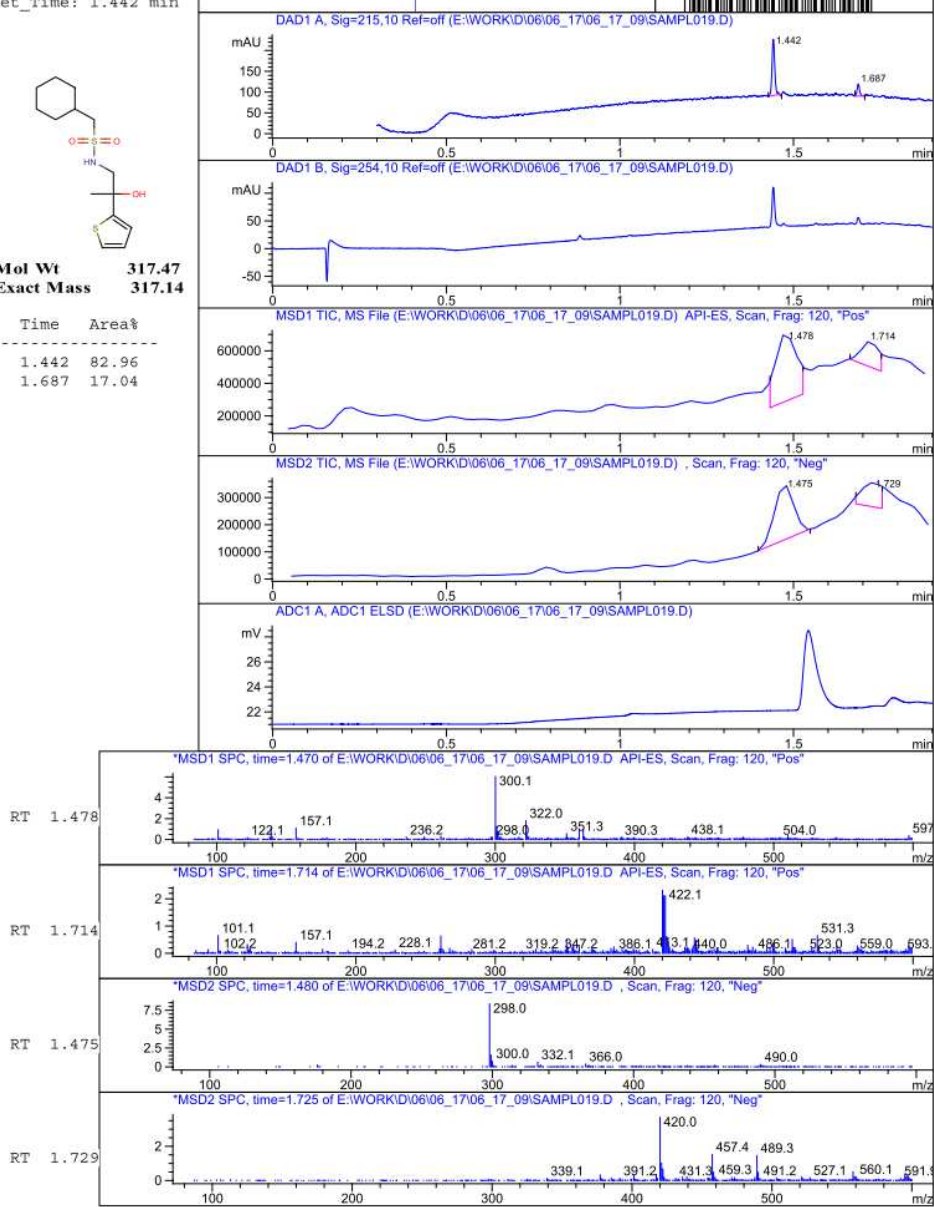

Peak of the **product** was not found, H<sub>2</sub>O-eliminated side product (alkene) (1.44 min, 83%).\*

3{3b,4}

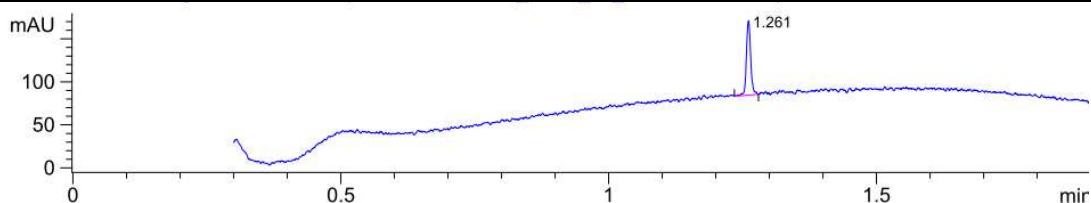

Peak was assigned to the **product** (1.26 min, 100%).\*

Figure S10

\* - assignment is based on the MS data.

**3{2a,5}**

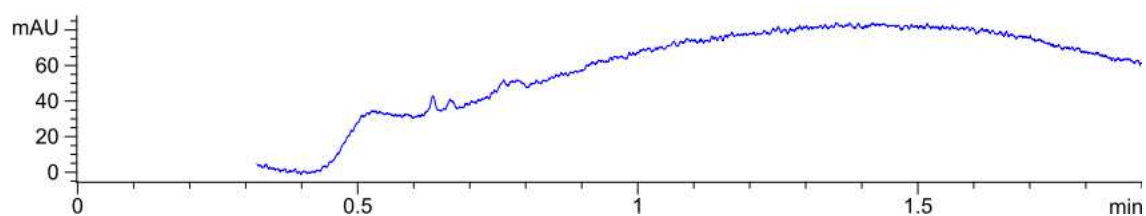

Peak was assigned to the **product** (0.66 min, 25%).\*

**3{2b,5}**

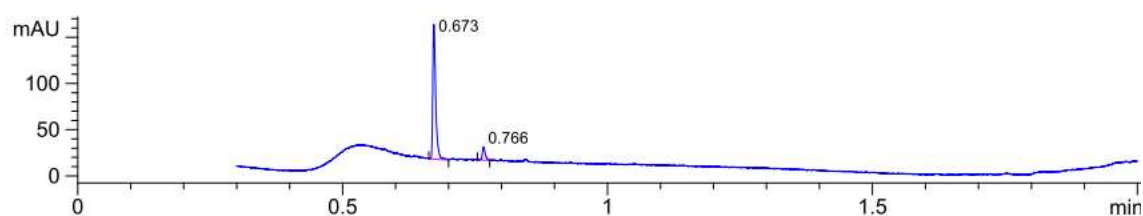

Peak was assigned to the **product** (0.67 min, 91%).\*

**Figure S11**

**3{5a,8}**

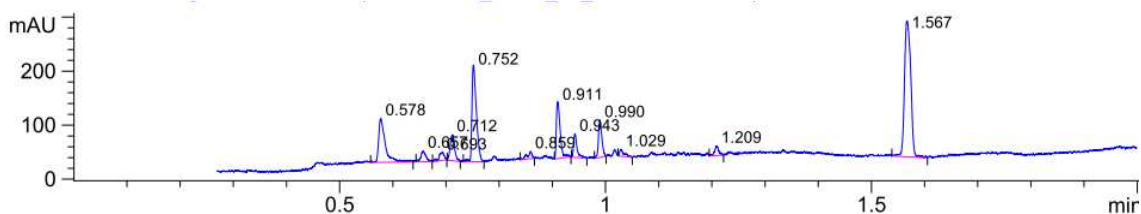

Peaks were assigned to disulfonlated side product (0.71 min, 5 %), the **product** (0.75 min, 18%), O-sulfonlated side product (1.57 min, 37%).\*

**3{5b,8}**

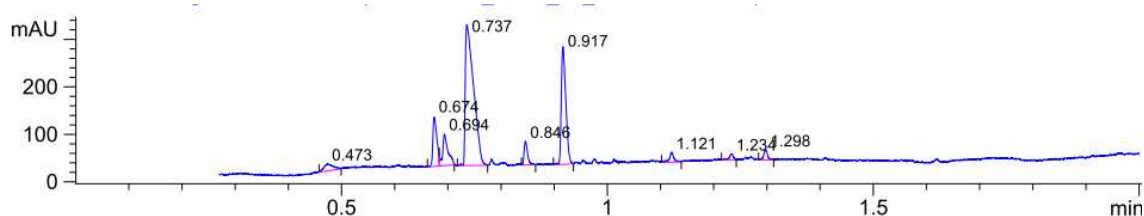

Peaks were assigned to disulfonlated side product (0.69 min, 7 %), the **product** (0.74 min, 50%).\*

**Figure S12**

\* - assignment is based on the MS data.

**3{5a,10}**

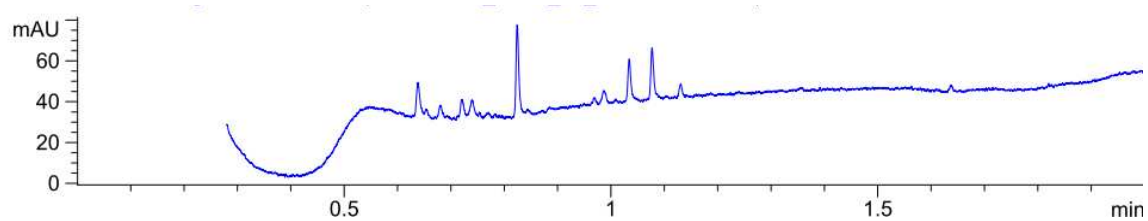

Peaks were assigned to the **product** (0.84 min, 35%), side product (OH repaced with Cl) (1.05 min, 20%).\*

**3{5b,10}**

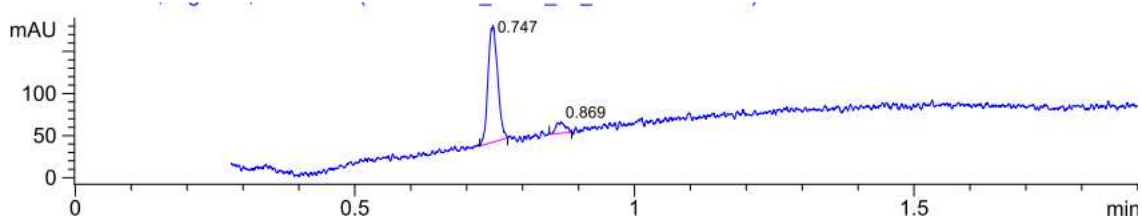

Peak was assigned to the **product** (0.75 min, 91%).\*

**Figure S13**

\* - assignment is based on the MS data.

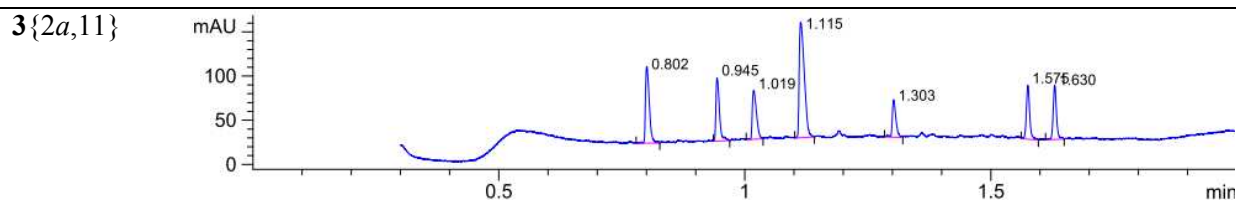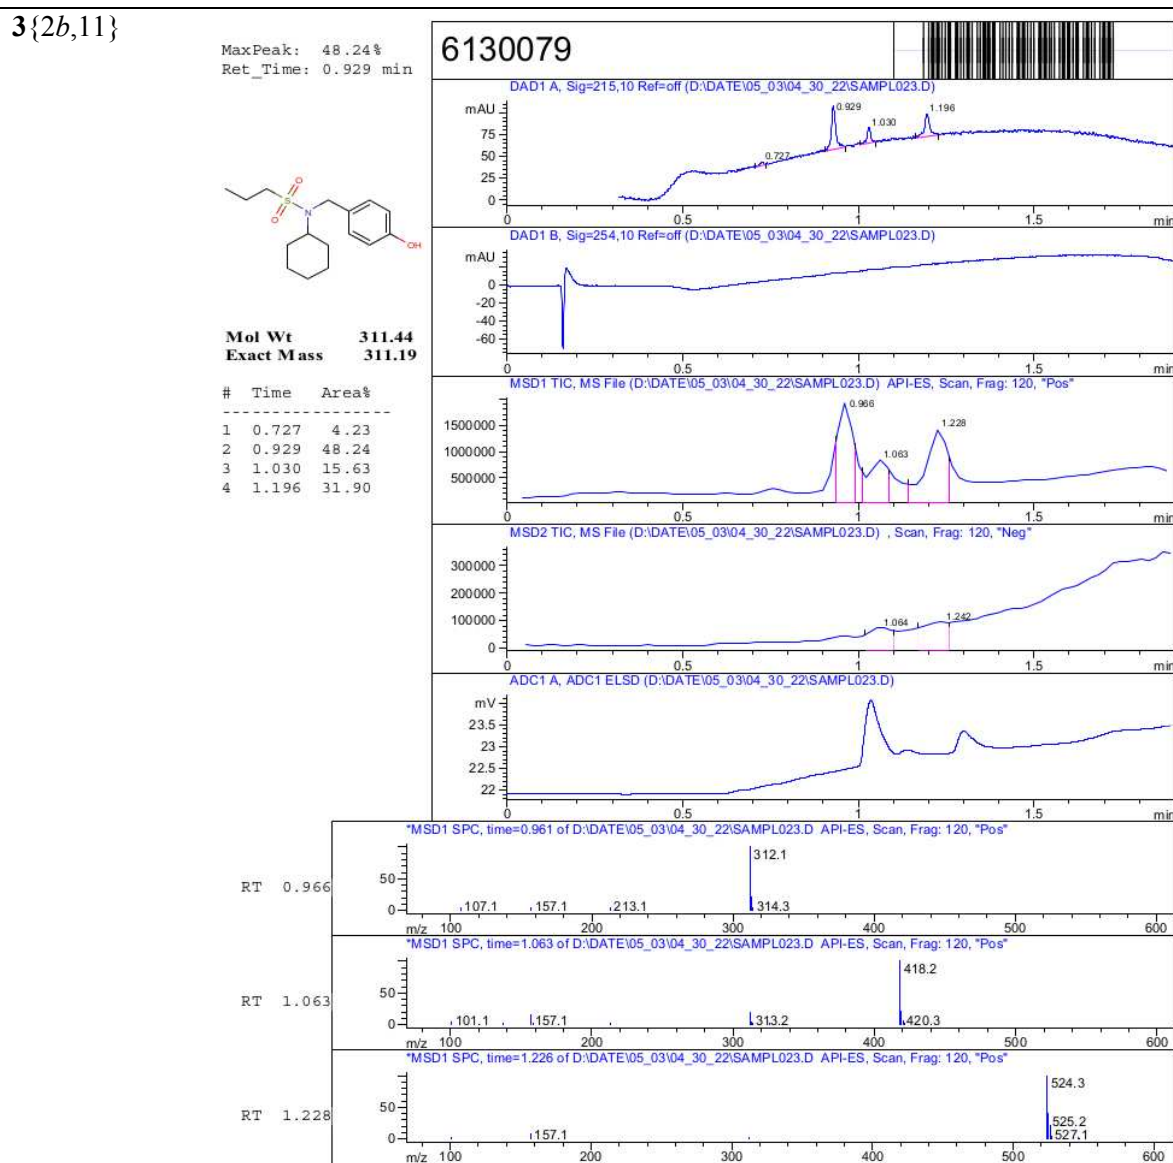

Peaks were assigned the **product** (0.93 min, 48%), disulfonylated side product (1.03 min, 16%), trisulfonylated side product (1.2 min, 32%).\*

**Figure S14**

\* - assignment is based on the MS data.

**3{5a,13}**

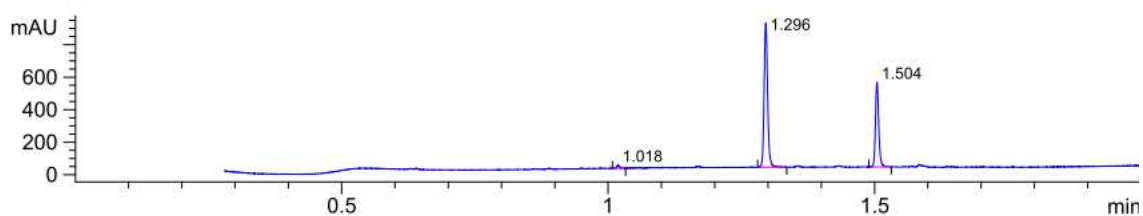

Peaks were assigned to O-sulfonylated side product (1.02 1%), the **product** (1.3 min, 64%), disulfonylated side product (1.5 min, 35%).\*

**3{5b,13}**

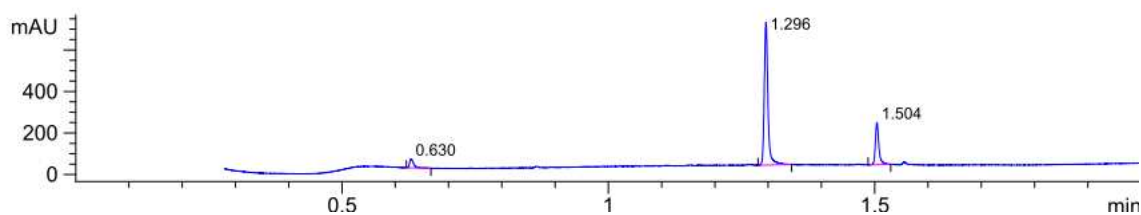

Peaks were assigned the **product** (1.3 min, 74%), disulfonylated side product (1.5 min, 21%).\*

**Figure S15**

\* - assignment is based on the MS data.

3{5a,14}

MaxPeak: 40.58%  
Ret\_Time: 1.212 min

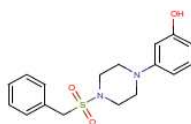

Mol Wt 332.42  
Exact Mass 332.14

| # | Time  | Area% |
|---|-------|-------|
| 1 | 0.852 | 5.61  |
| 2 | 1.012 | 5.31  |
| 3 | 1.099 | 3.69  |
| 4 | 1.212 | 40.58 |
| 5 | 1.262 | 1.74  |
| 6 | 1.483 | 37.38 |
| 7 | 1.585 | 5.69  |

6130252

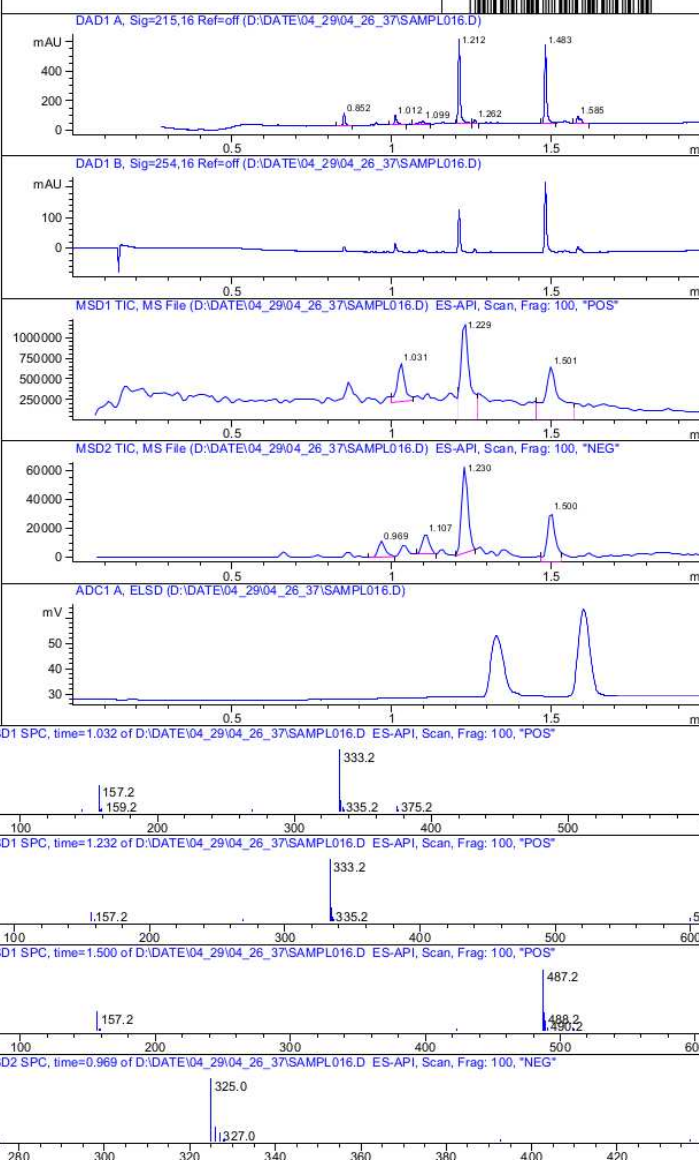

Peaks were assigned to O-sulfonylated side product (1.01 5%), the **product** (1.2 min, 41%), disulfonylated side product (1.48 min, 37%).\*

3{5b,14}

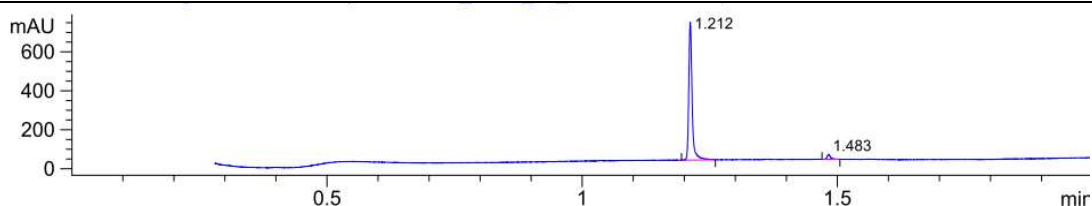

Peaks were assigned the **product** (1.2 min, 96%), disulfonylated side product (1.48 min, 4%).\*

Figure S16

\* - assignment is based on the MS data.



3{2a,15}

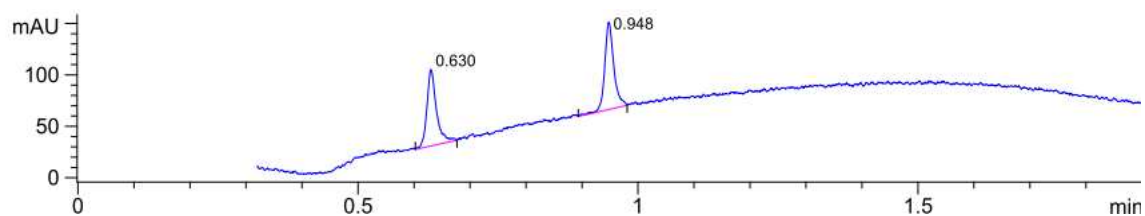

Peaks were assigned to the **product** (0.63 min, 48%), disulfonylated side product (0.95 min, 52%).\*

3{2b,15}

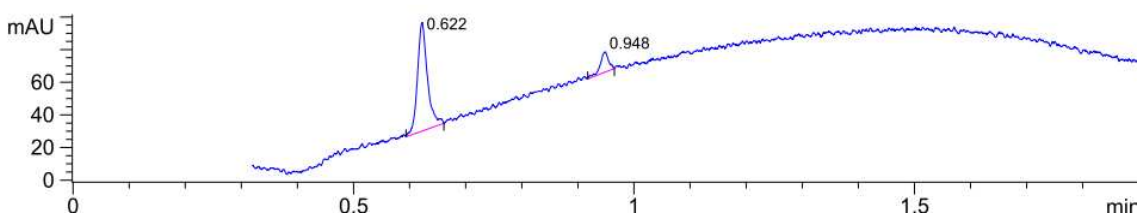

Peaks were assigned the **product** (0.62 min, 86%), disulfonylated side product (0.95 min, 14%).\*

Figure S17

3{2a,16}

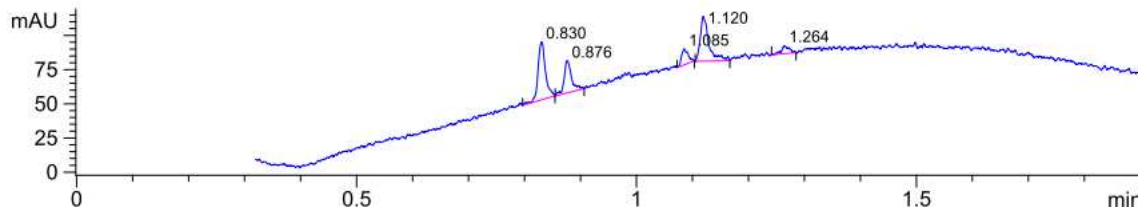

Peaks were assigned to N<sub>pz</sub> sulfonylated side product (0.83 min, 35%), the **product** (0.88 min, 20%), disulfonylated side product (1.12, 1.26 min, 32%).\*

3{2b,16}

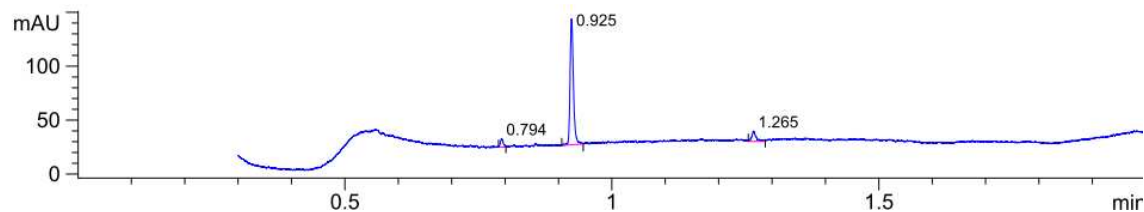

Peaks were assigned to N<sub>pz</sub> sulfonylated side product (0.79 min, 5%); the **product** (0.93 min, 85%), disulfonylated side product (1.27 min, 10%).\*

Figure S18

\* - assignment is based on the MS data.

3{5a,17}

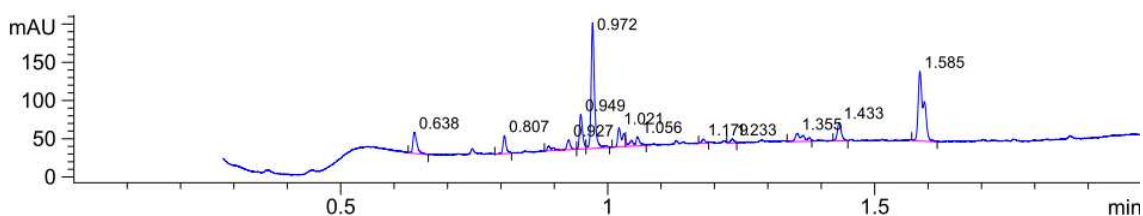

Peak was assigned to O-sulfonylated side product (0.97 min, 29%), peak of the **product** was not found.\*

3{5b,17}

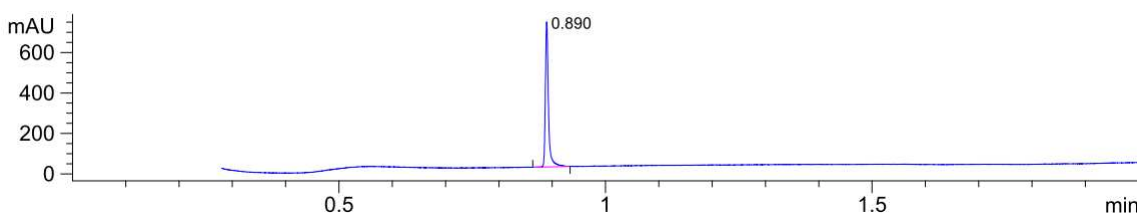

Peak was assigned to the **product** (0.89 min, 100%).\*

Figure S19

3{5a,18}

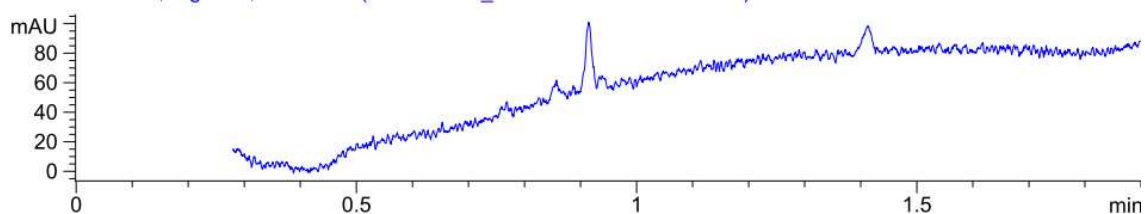

Peak of the **product** was not found.

3{5b,18}

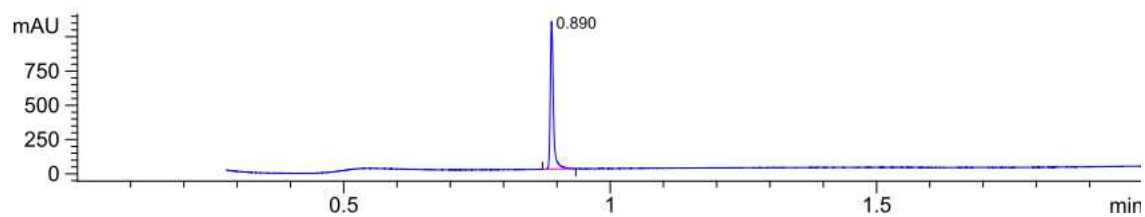

Peak was assigned to the **product** (0.89 min, 100 %).\*

Figure S20

\* - assignment is based on the MS data.

3{5a,19}

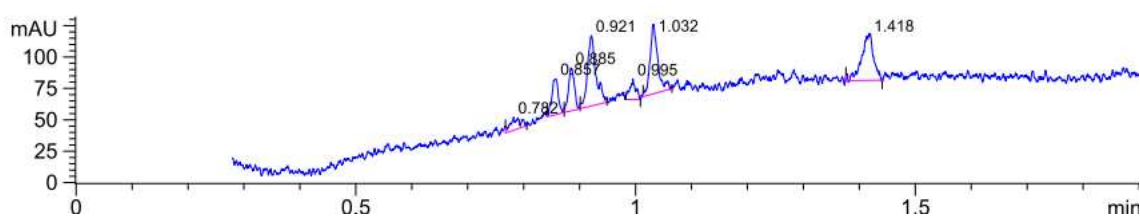

Peaks were assigned to O-sulfonylated side product (0.92 min, 25%), the **product** (1.03 min, 22%).\*

3{5b,19}

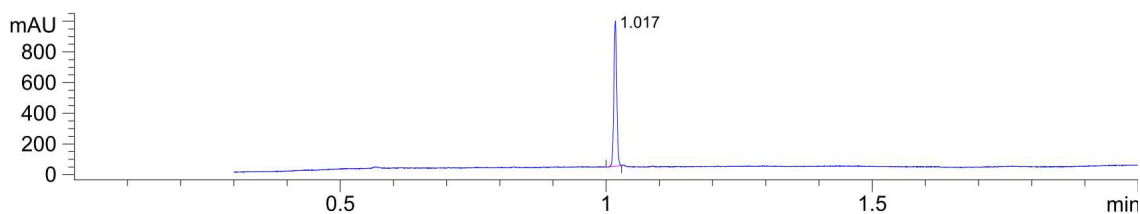

Peak was assigned to the **product** (1.02 min, 100%).\*

Figure S21

3{3b,32}

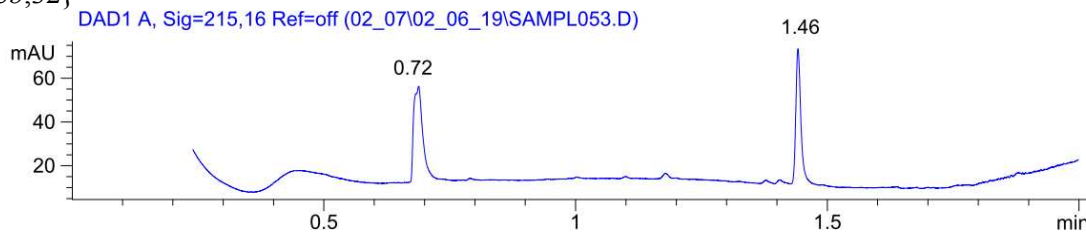

Peaks were assigned to side product, cyclohexylmethanesulfonic acid (0.72 min, 54%) and the **product** (1.46 min, 46%).\*

Figure S22

3{7b,34}

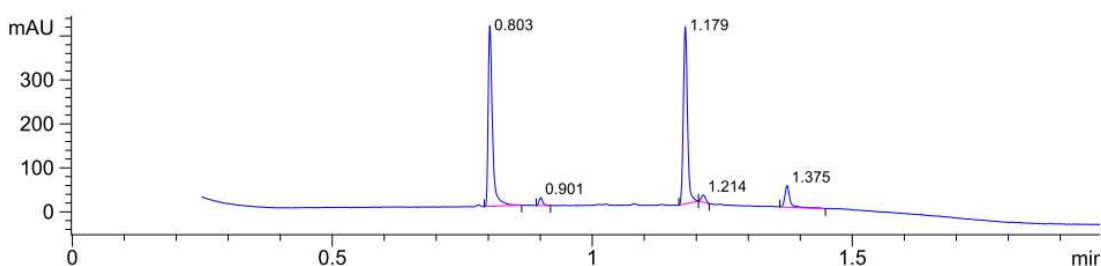

Peak was assigned to the **product** (1.18 min, 46%).\*

Figure S23

\* - assignment is based on the MS data.

3{1b,36}

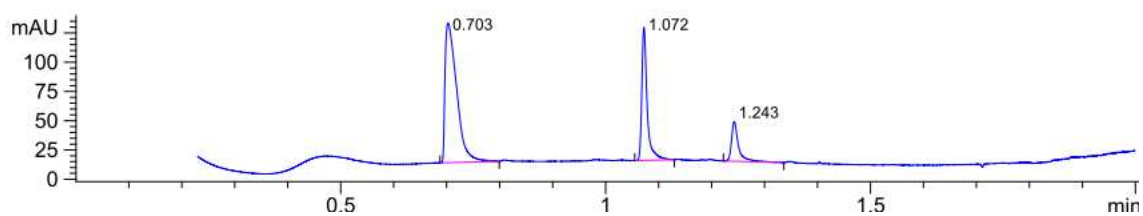

Peaks were assigned to amine **2**{36} (0.70 min, 62%) and the **product** (1.07 min, 27%).\*

Figure S24

3{7b,32}

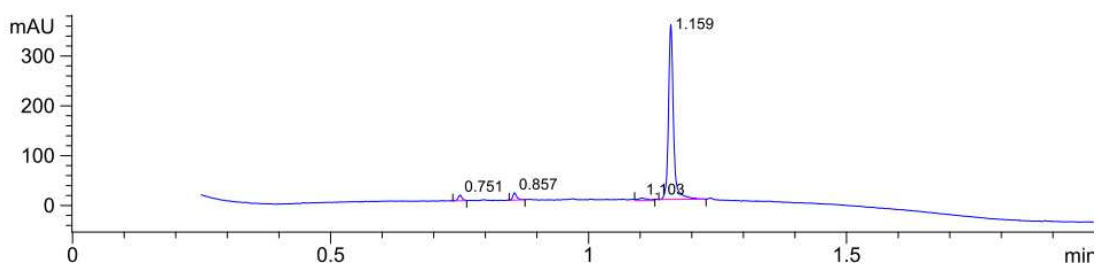

Peak was assigned to the **product** (1.16 min, 92%).\*

Figure S25

3{7b,38}

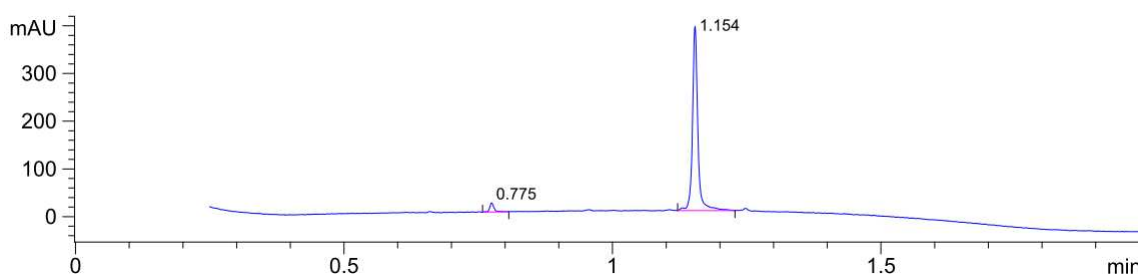

Peak was assigned to the **product** (1.15 min, 96%).\*

Figure S26

\* - assignment is based on the MS data.

Comparison of NMR spectra of the selected crude mixtures analyzed after completion of the synthesis (Figures S22-S31).

**3{2a,1}**, purity 20%

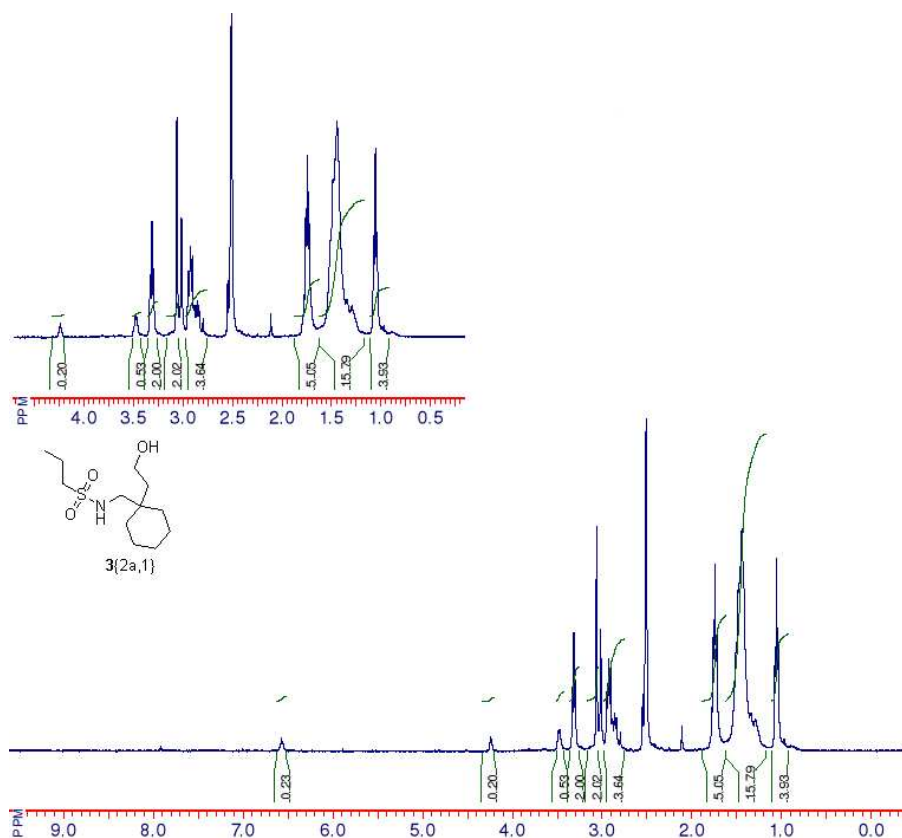

**3{2b,1}**, purity 20%

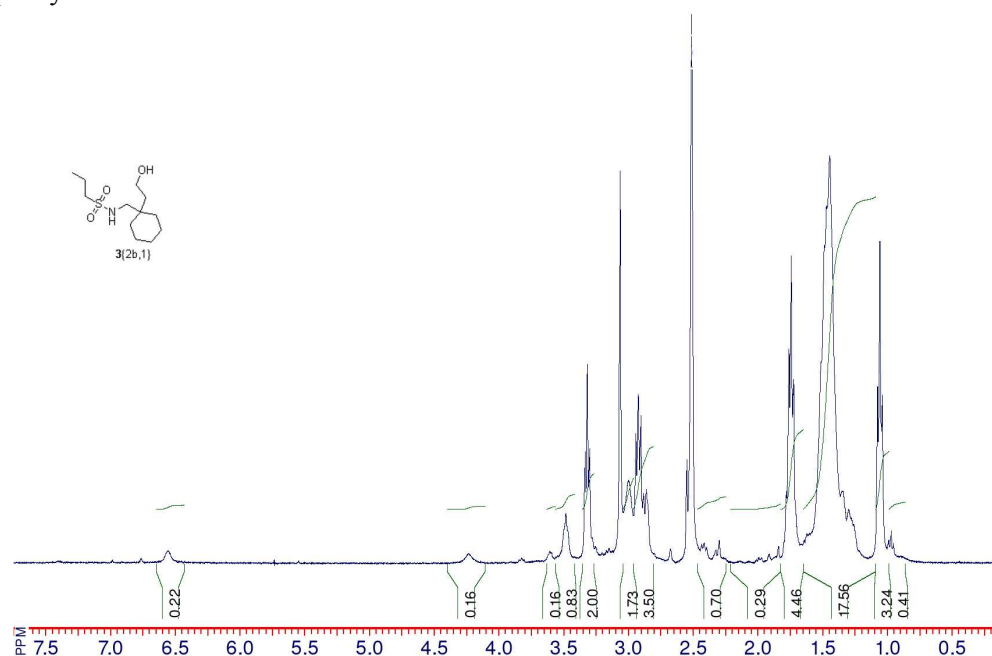

Figure S27

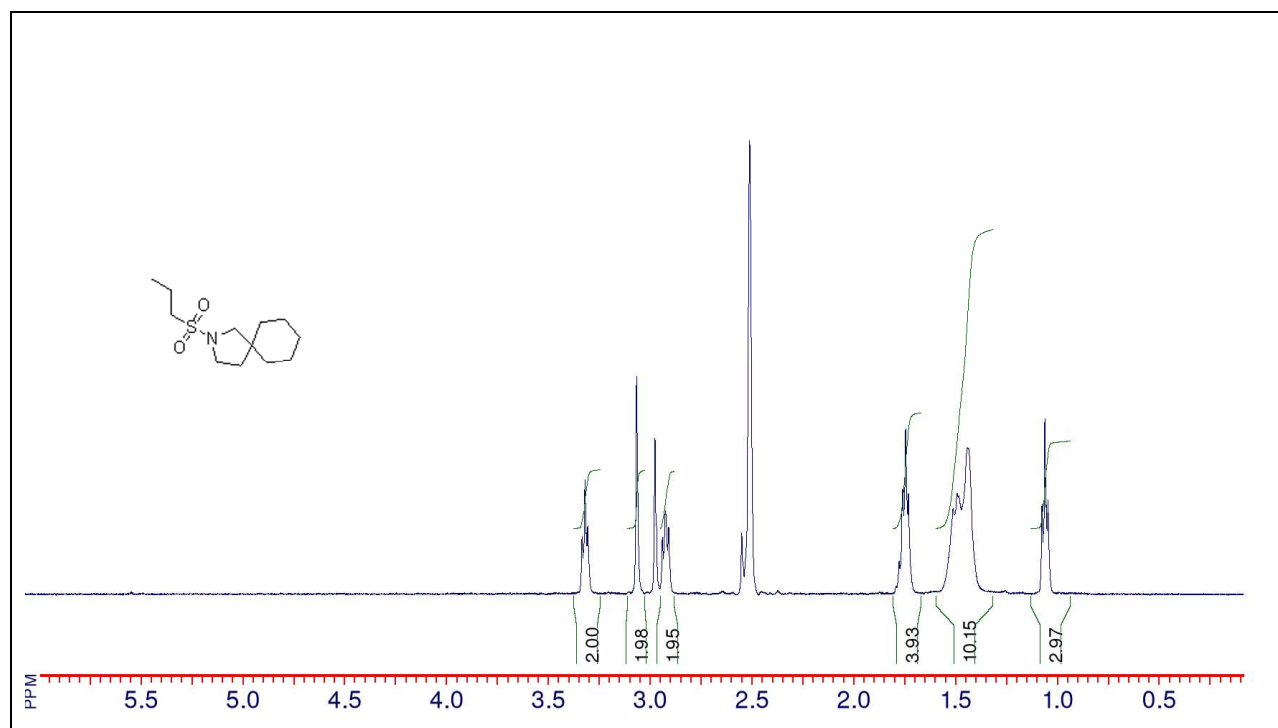

**Figure S28.**  $^1\text{H}$  NMR spectrum of 2-(Propane-1-sulfonyl)-2-aza-spiro[4.5]decane (side product).

**3{2a,2}**, purity 15%

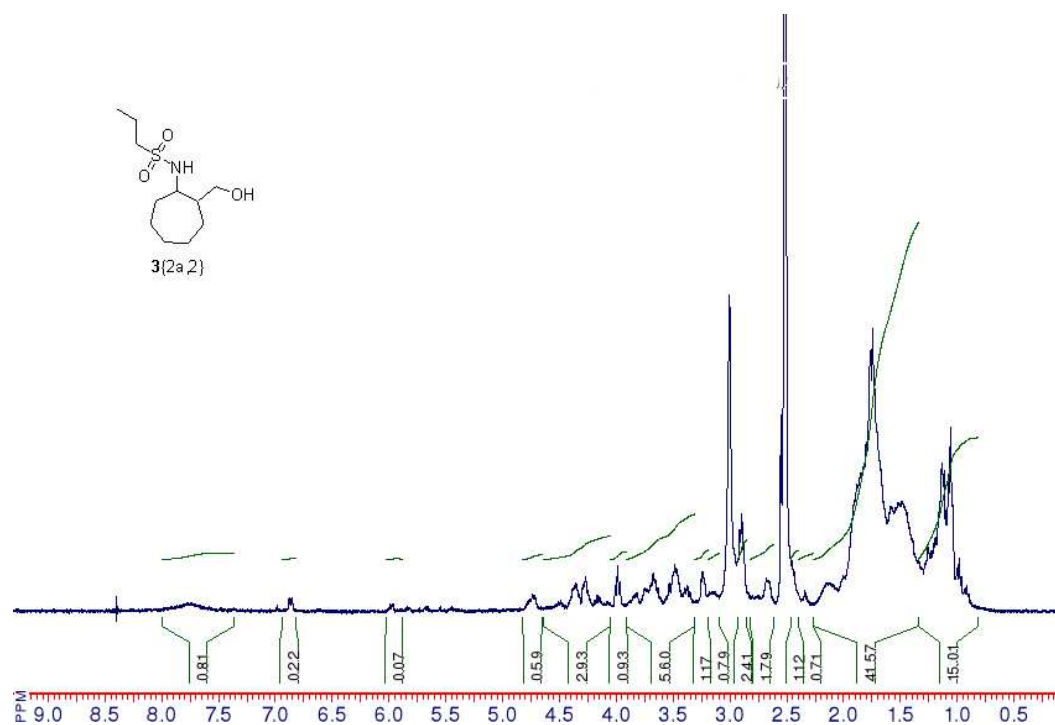

**3{2b,2}**, purity >90%

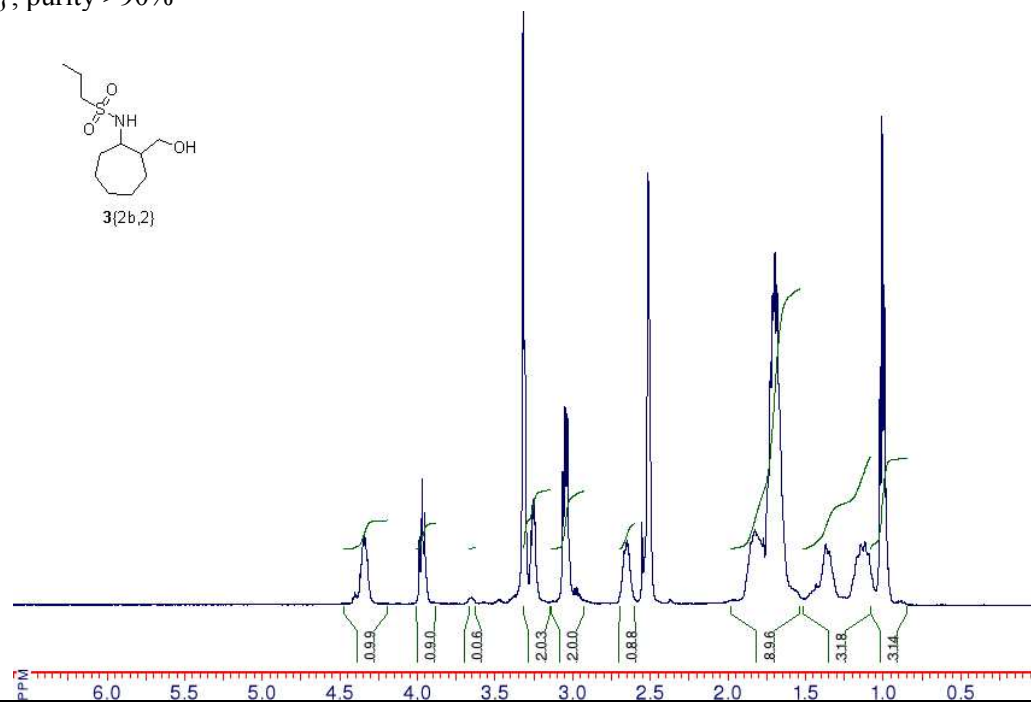

Figure S29

**3{2a,4}**, purity 5%

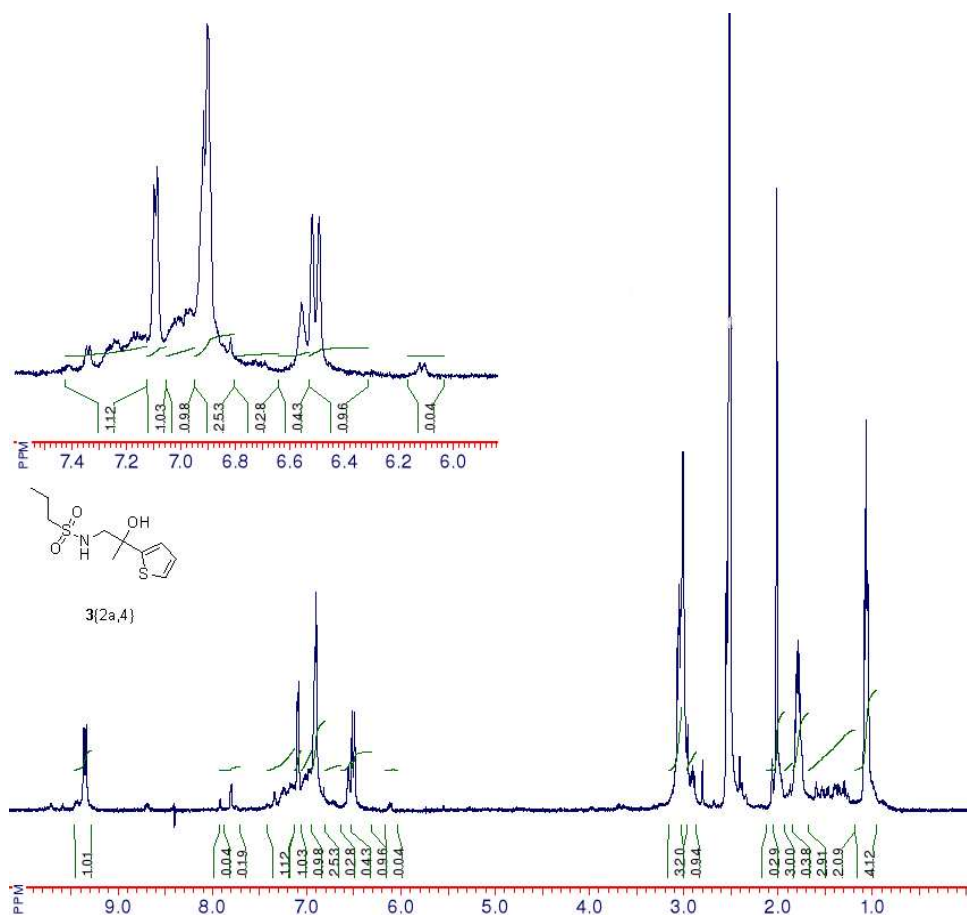

**3{2b,4}**, purity >90%

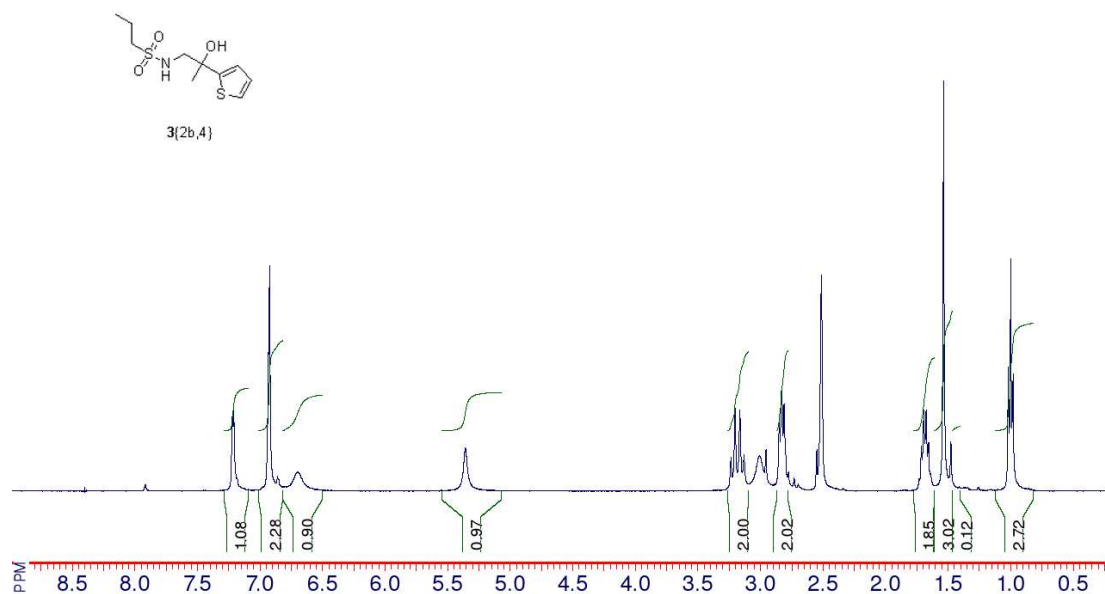

**Figure S30**



**3{2*a*,6}**, purity 80%

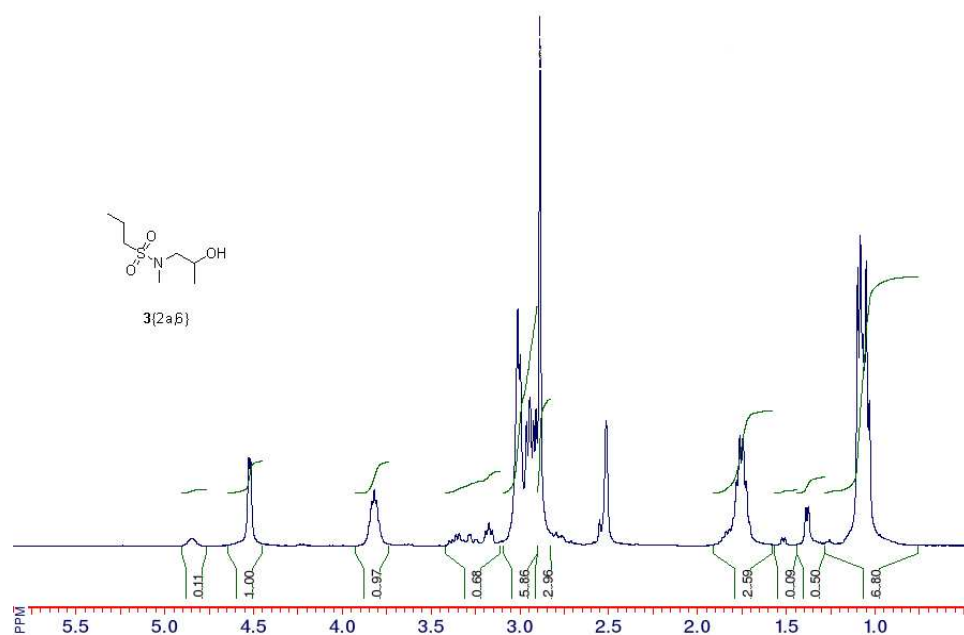

**3{2*b*,6}**, purity >90%

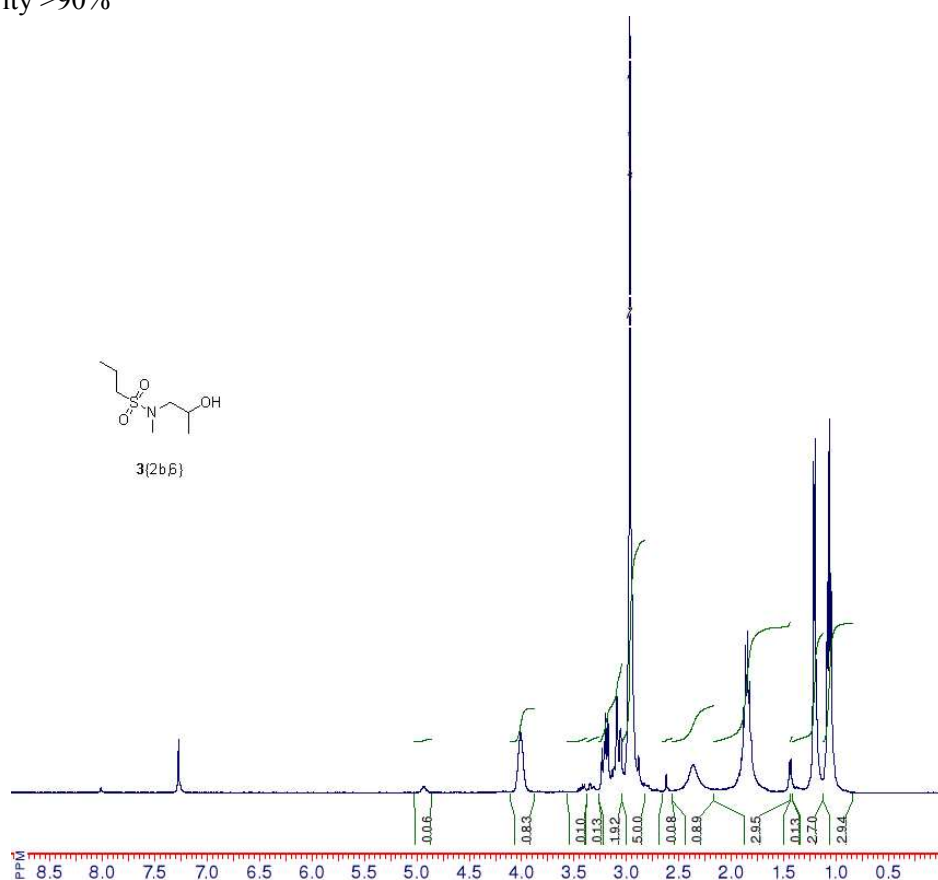

Figure S31

**3{5a,7}**, purity 85%

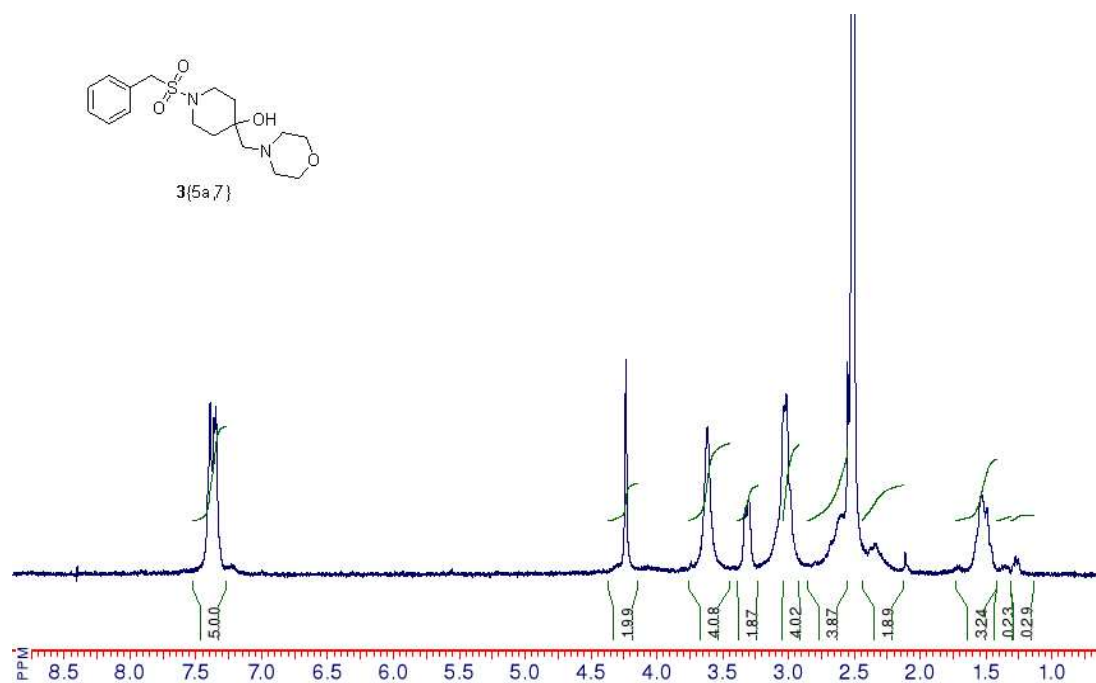

**3{5b,7}**, purity >95%

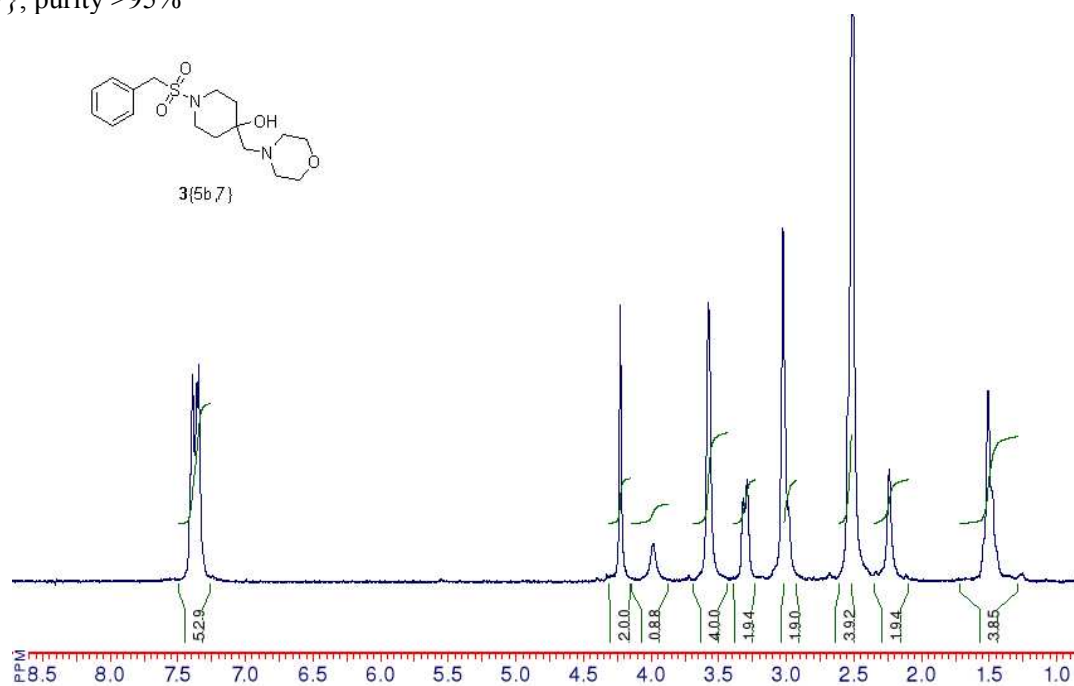

**Figure S32**

**3{1*a*,8}**, purity 5%

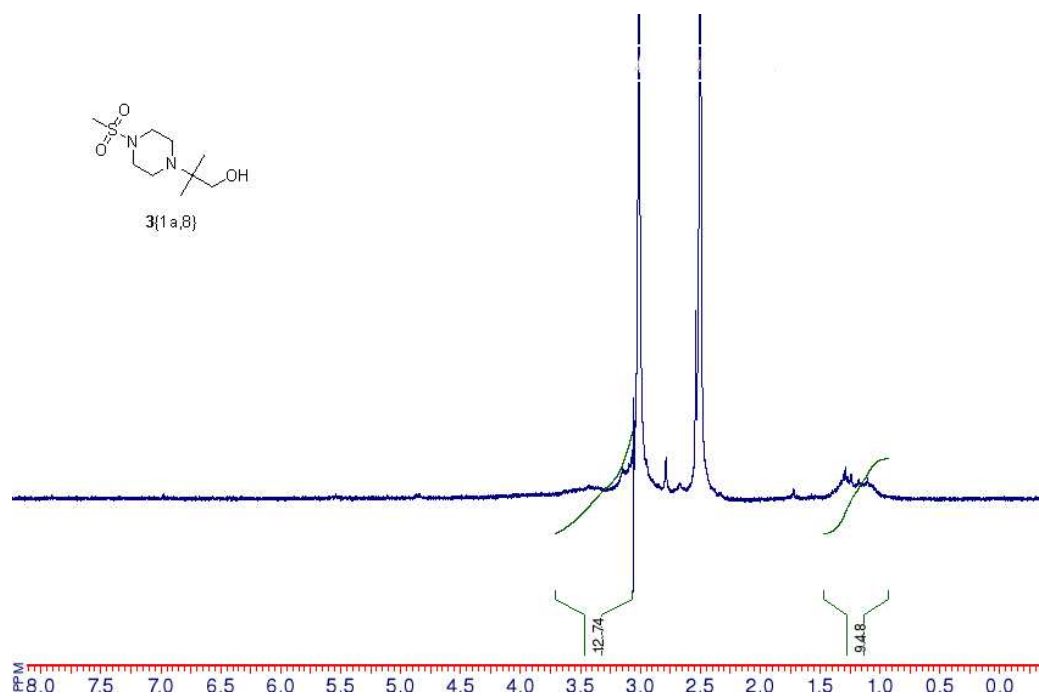

**3{1*b*,8}**, purity >90%

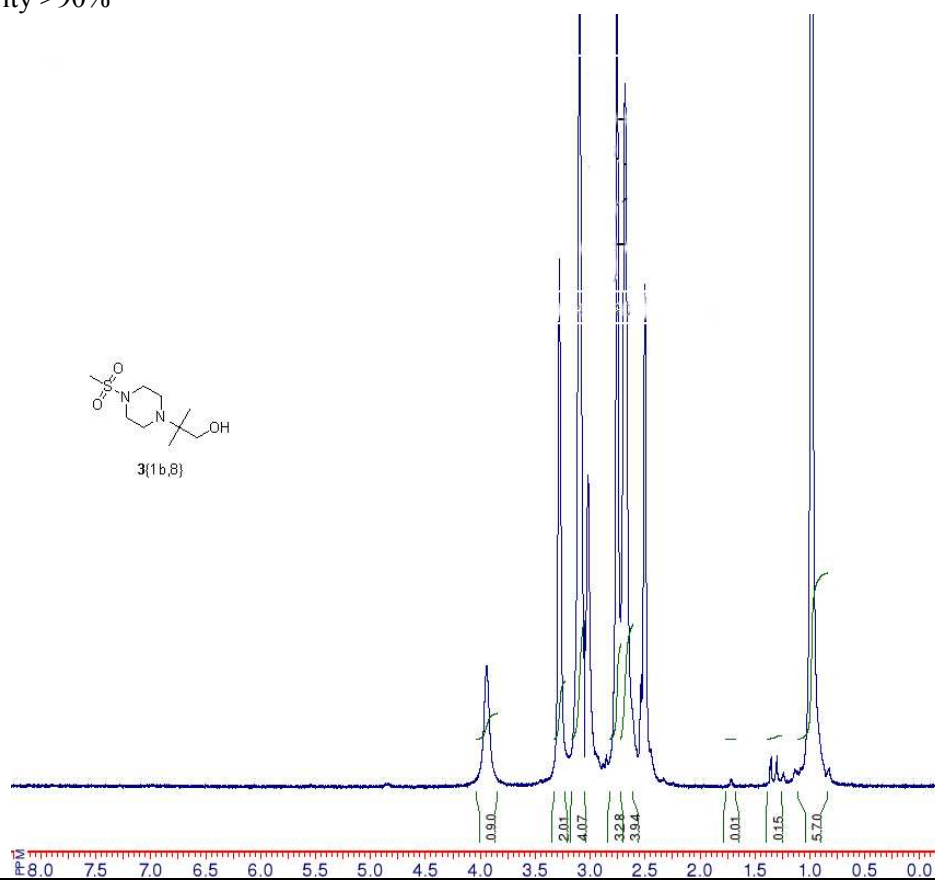

Figure S33

**3{5a,9}**, purity 10%

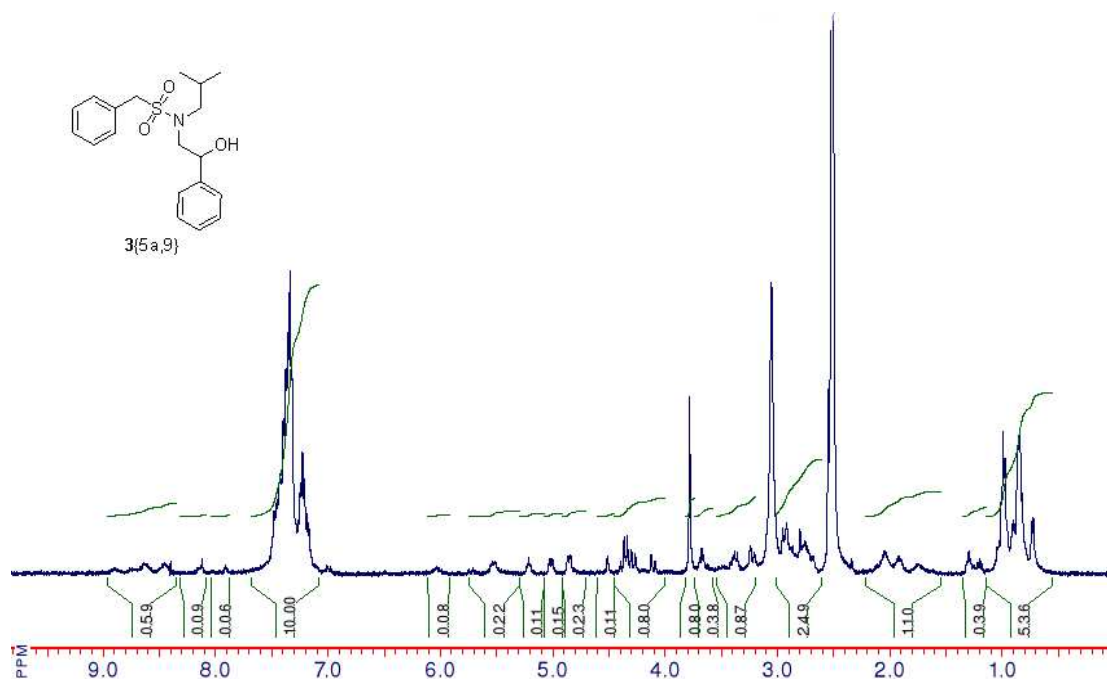

**3{5b,9}**, purity >75%

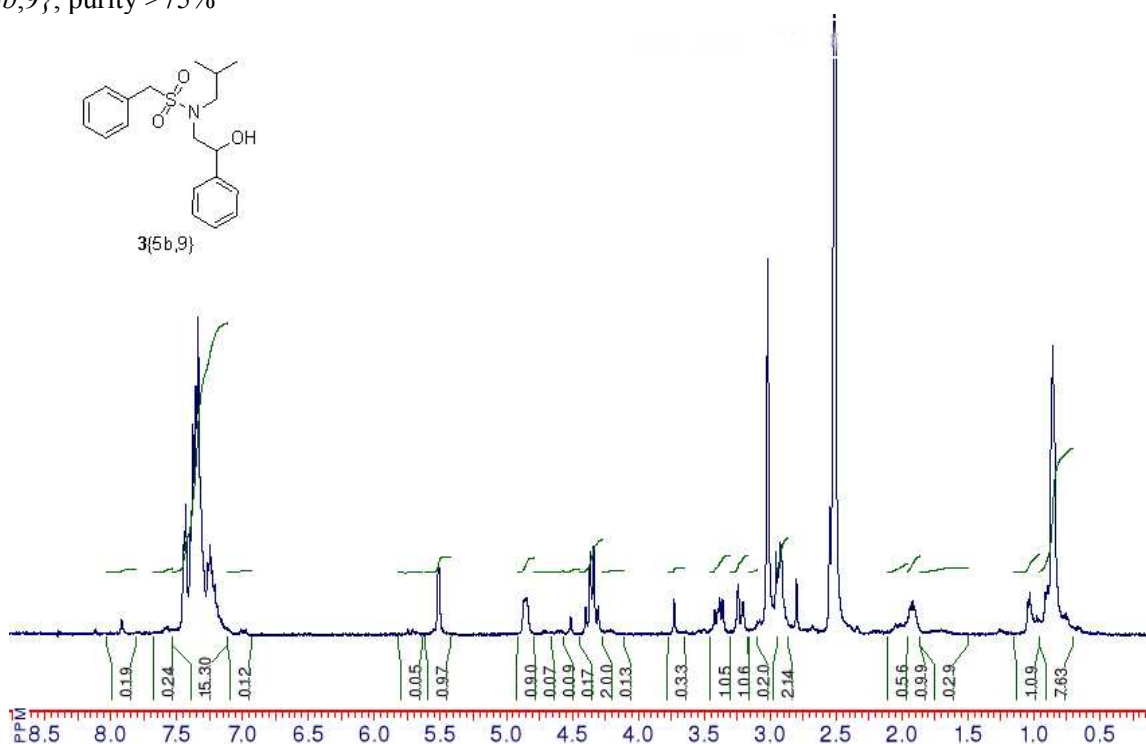

Figure S34

**3{3a,17}**, purity 20%

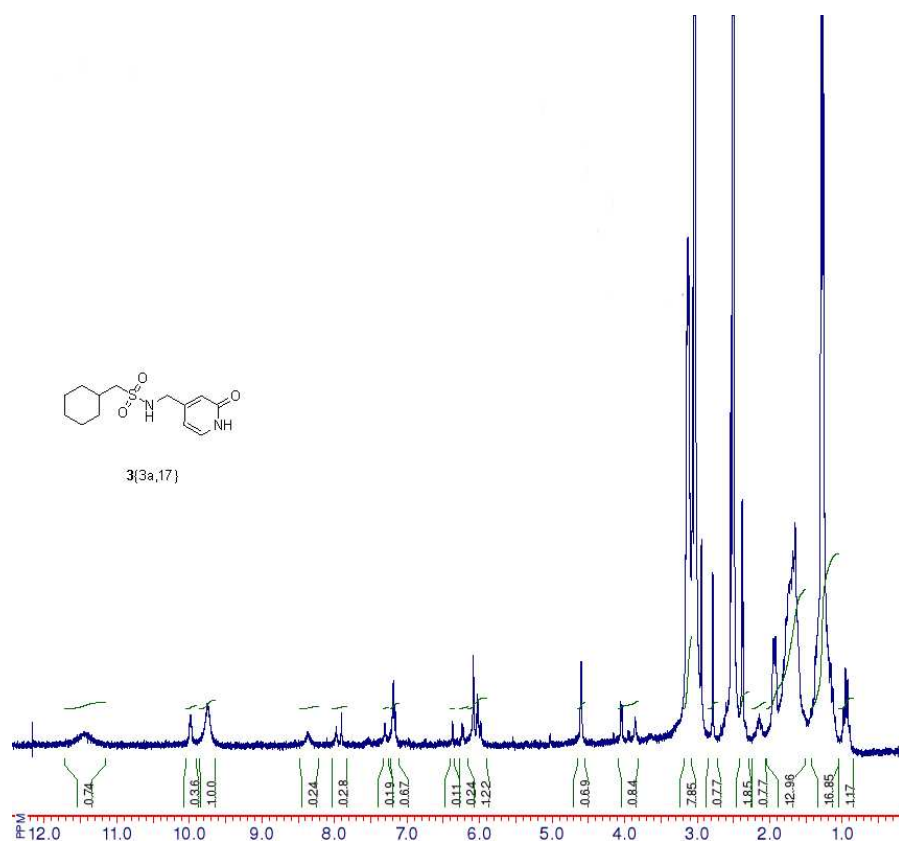

**3{3b,17}**, purity 85%

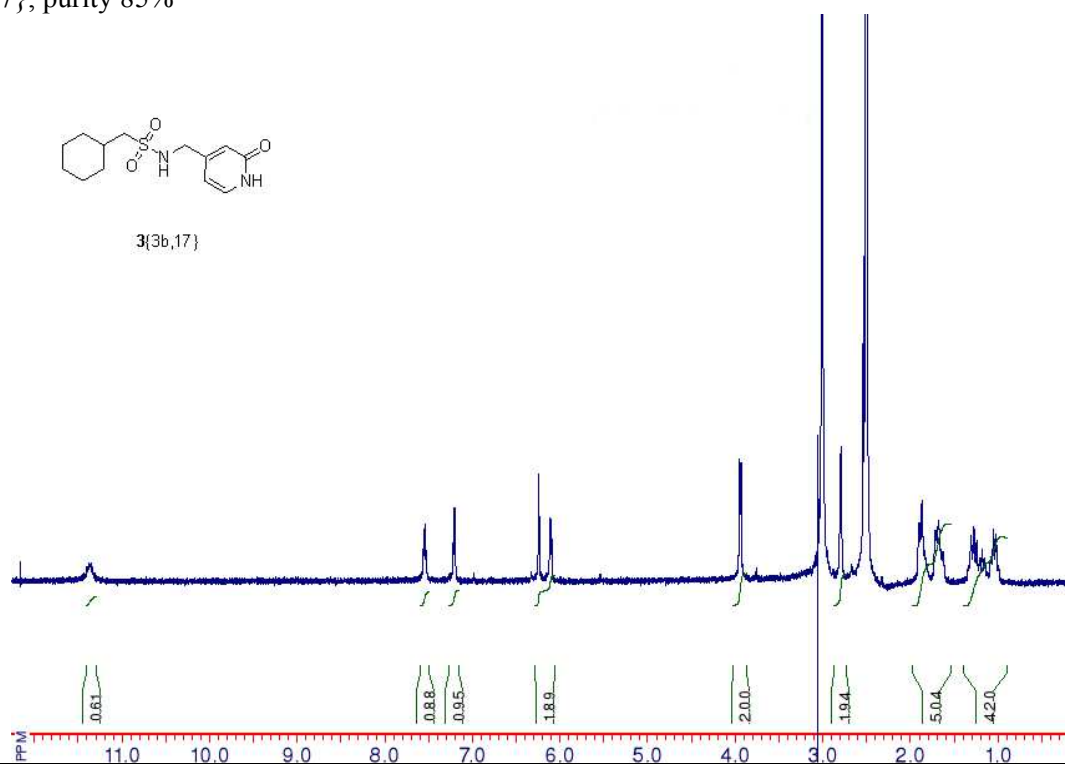

Figure S35

**3{3a,18}, purity 25%**

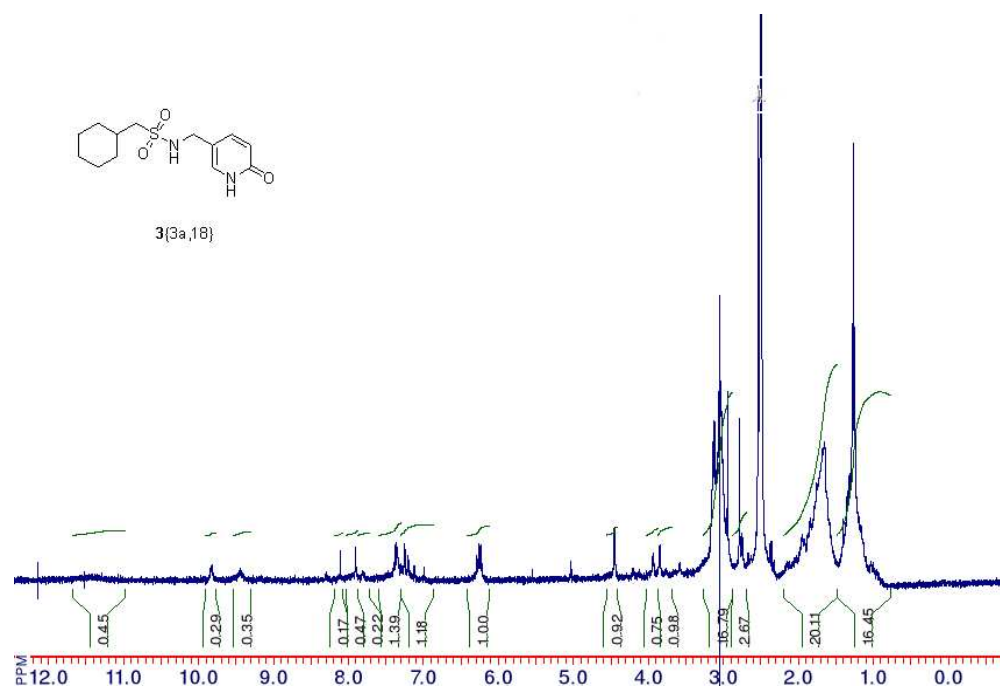

**3{3b,18}, purity 90%**

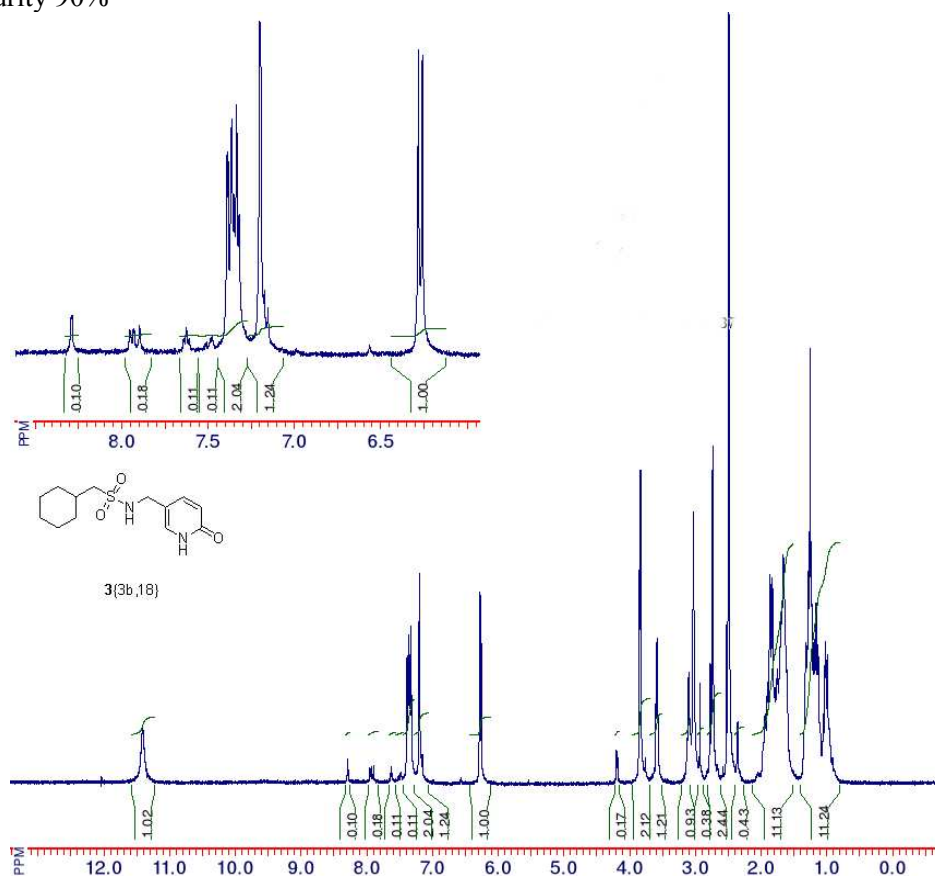

**Figure S36**

## Spectral data for the selected compounds.

### Propane-1-sulfonic acid 2-(4-hydroxy-piperidin-1-ylmethyl)-benzylamide (3{2,3})

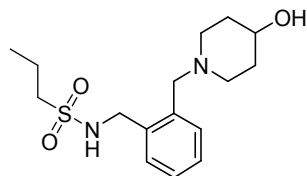

Whitish solid, mp 80-82°C; **FTIR** (KBr):  $\nu_{\max}$  (cm<sup>-1</sup>) 3360 (OH+NH), 3080, 3055, 2981, 2905 (CH), 1139 (SO<sub>2</sub>); **<sup>1</sup>H NMR** (500 MHz, DMSO-d<sub>6</sub>):  $\delta$  (ppm) 0.86 (t, J = 8.0 Hz, 3H, CH<sub>3</sub>), 1.35 (m, 2H, CH<sub>2</sub>), 1.52 (m, 2H, CH<sub>2</sub>), 1.66 (m, 2H, CH<sub>2</sub>), 2.10 (m, 2H, CH<sub>2</sub>), 2.64 (m, 2H, CH<sub>2</sub>), 2.89 (t, J = 7.7 Hz, 2H, CH<sub>2</sub>), 3.49 (br s, 3H, CH<sub>2</sub> + CH), 4.23 (s, 2H, CH<sub>2</sub>), 4.58 (br s, 1H, OH), 7.25 (m, 2H, Ar), 7.29 (m, 1H, Ar), 7.39 (d, J = 6.6 Hz, 1H, Ar), 8.36 (br s, 1H, NH).; **<sup>13</sup>C NMR** (125.75 MHz, DMSO-d<sub>6</sub>):  $\delta$  (ppm) 12.7, 16.9, 34.0, 44.8, 50.4, 53.3, 60.2, 65.9, 127.4, 127.8, 129.5, 131.2, 136.6, 137.9; **MS** (APCI) m/z calculated for C<sub>16</sub>H<sub>27</sub>N<sub>2</sub>O<sub>3</sub>S 327.2 [M+H]<sup>+</sup>, found 327.1.

### N-(2-Hydroxy-2-thiophen-2-yl-propyl)-methanesulfonamide (3{1,4})

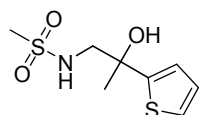

Yellow oil; **<sup>1</sup>H NMR** (500 MHz, DMSO-d<sub>6</sub>):  $\delta$  (ppm) 1.15 (s, 3H, CH<sub>3</sub>), 2.81 (s, 3H, CH<sub>3</sub>), 3.11 (d, J = 13 Hz, 1H, CH<sub>2</sub>), 3.17 (d, J = 13 Hz, 1H, CH<sub>2</sub>), 5.64 (s, 1H, OH), 6.91 (s, 1H, NH), 6.95 (2, 2H, Het), 7.36 (d, J = 4.5 Hz, 1H, Het); **<sup>13</sup>C NMR** (125.75 MHz, DMSO-d<sub>6</sub>):  $\delta$  (ppm) 27.5, 54.4, 72.1, 122.8, 124.2, 126.8, 152.5, 162.4; **MS** (APCI) m/z calculated for C<sub>8</sub>H<sub>14</sub>NO<sub>3</sub>S<sub>2</sub> 236.1 [M+H]<sup>+</sup>, found 236.2.

### N-(2-Hydroxy-propyl)-N-methyl-C-phenyl-methanesulfonamide (3{5,6})

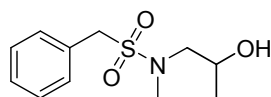

Yellowish solid, mp 55-57°C; **FTIR** (KBr):  $\nu_{\max}$  (cm<sup>-1</sup>) 3375 (OH), 3088, 3063, 3034, 2979, 2915 (CH), 1146 (SO<sub>2</sub>); **<sup>1</sup>H NMR** (500 MHz, DMSO-d<sub>6</sub>):  $\delta$  (ppm) 1.00 (d, J = 6.3 Hz, 3H, CH<sub>3</sub>), 2.76 (s, 3H, CH<sub>3</sub>), 2.86 (d, J = 6.3 Hz, 2H, CH<sub>2</sub>), 3.74 (six, J = 5.8 Hz, 1H, CH), 4.40 (s, 2H, CH<sub>2</sub>), 4.73 (d, J = 5.8 Hz,

1H, OH), 7.37 (m, 5H, Ar); <sup>13</sup>C NMR (125.75 MHz, DMSO-d<sub>6</sub>): δ (ppm) 21.1, 36.3, 54.7, 57.1, 65.0, 128.2, 128.4, 130.0, 131.0; **MS** (APCI) m/z calculated for C<sub>11</sub>H<sub>18</sub>NO<sub>3</sub>S 244.1 [M+H]<sup>+</sup>, found 244.0.

**2-(4-Phenylmethanesulfonyl-piperazin-1-yl)-phenol (3{5,13})**

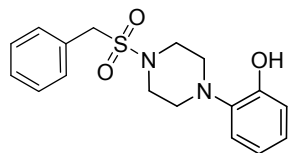

Whitish solid, mp 136-138°C; **FTIR** (KBr): ν<sub>max</sub> (cm<sup>-1</sup>) 3421 (OH), 3063, 3042, 2960, 2928, 2888, 2842 (CH), 1155 (SO<sub>2</sub>); <sup>1</sup>H NMR (500 MHz, DMSO-d<sub>6</sub>): δ (ppm) 2.93 (m, 4H, 2CH<sub>2</sub>), 3.26 (m, 4H, 2CH<sub>2</sub>), 4.45 (s, 2H, CH<sub>2</sub>), 6.73 (t, J = 7.4 Hz, 1H, Ar), 6.80 (d, J = 8.0 Hz, 1H, Ar), 6.85 (t, J = 8.5 Hz, 2H, Ar), 7.39 (m, 3H, Ar), 7.44 (m, 2H, Ar), 9.06 (s, 1H, OH); <sup>13</sup>C NMR (125.75 MHz, DMSO-d<sub>6</sub>): δ (ppm) 45.8, 50.1, 54.3, 115.8, 119.1, 119.5, 123.4, 128.3, 128.5, 128.8, 129.6, 131.1, 139.3, 150.2; **MS** (APCI) m/z calculated for C<sub>17</sub>H<sub>21</sub>N<sub>2</sub>O<sub>3</sub>S 333.1 [M+H]<sup>+</sup>, found 333.1.

**3-(4-Phenylmethanesulfonyl-piperazin-1-yl)-phenol (3{5,14})**

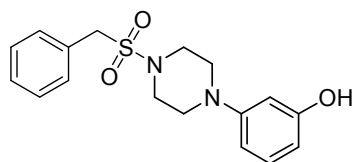

Brownish solid, mp 170-172°C; **FTIR** (KBr): ν<sub>max</sub> (cm<sup>-1</sup>) 3158 (OH), 3058, 3036, 2978, 2930, 2849 (CH), 1160 (SO<sub>2</sub>); <sup>1</sup>H NMR (500 MHz, DMSO-d<sub>6</sub>): δ (ppm) 3.08 (m, 4H, 2CH<sub>2</sub>), 3.22 (m, 4H, 2CH<sub>2</sub>), 4.45 (s, 2H, CH<sub>2</sub>), 6.26 (dd, J = 1.8; 8.1 Hz, 1H, Ar), 6.31 (m, 1H, Ar), 6.38 (dd, J = 1.9; 8.2 Hz, 1H, Ar), 6.99 (t, J = 8.2 Hz, 1H, Ar), 7.38 (m, 3H, Ar), 7.42 (m, 2H, Ar), 9.18 (s, 1H, OH); <sup>13</sup>C NMR (125.75 MHz, DMSO-d<sub>6</sub>): δ (ppm) 45.5, 48.6, 54.4, 103.2, 107.0, 107.3, 128.3, 128.5, 129.5, 129.7, 131.0, 152.0, 158.2; **MS** (APCI) m/z calculated for C<sub>17</sub>H<sub>21</sub>N<sub>2</sub>O<sub>3</sub>S 333.1 [M+H]<sup>+</sup>, found 333.2.



**Propane-1-sulfonic acid (2H-pyrazol-3-ylmethyl)-amide (3{2,15})**

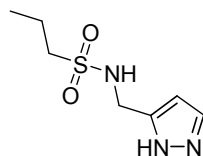

Whitish solid, mp 82-84°C; **FTIR** (KBr):  $\nu_{\text{max}}$  (cm<sup>-1</sup>) 3260 (NH), 3000, 2950, 2880 (CH), 1138 (SO<sub>2</sub>); **<sup>1</sup>H NMR** (500 MHz, DMSO-d<sub>6</sub>):  $\delta$  (ppm) 0.87 (t, J = 7.1 Hz, 3H, CH<sub>3</sub>), 1.57 (m, 2H, CH<sub>2</sub>), 2.85 (t, J = 8.0 Hz, 2H, CH<sub>2</sub>), 4.11 (s, 2H, CH<sub>2</sub>), 6.22 (s, 1H, CH, Ar), 7.43 (m, 1H, CH, Ar), 7.64 (m, 1H, NH), 12.65 (br s, 1H, NH); **<sup>13</sup>C NMR** (125.75 MHz, DMSO-d<sub>6</sub>):  $\delta$  (ppm) 12.7, 16.9, 53.4, 103.6, 129.2, 148.8; **MS** (APCI) m/z calculated for C<sub>7</sub>H<sub>14</sub>N<sub>3</sub>O<sub>2</sub>S 204.1 [M+H]<sup>+</sup>, found 204.0.

**N-(2-Oxo-1,2-dihydro-pyridin-4-ylmethyl)-C-phenyl-methanesulfonamide (3{5,17})**

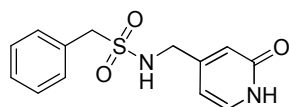

White solid, mp 202-204°C; **FTIR** (KBr):  $\nu_{\text{max}}$  (cm<sup>-1</sup>) 3238 (NH), 3108, 3077, 3013, 2878 (CH), 1136 (SO<sub>2</sub>); **<sup>1</sup>H NMR** (500 MHz, DMSO-d<sub>6</sub>):  $\delta$  (ppm) 3.91 (d, J = 6.4 Hz, 2H, CH<sub>2</sub>), 4.37 (s, 2H, CH<sub>2</sub>), 6.10 (d, J = 6.9 Hz, 1H, CH, Py), 6.23 (s, 1H, CH, Py), 7.30 (d, J = 6.7 Hz, 1H, CH, Py), 7.36 (m, 5H, Ar), 7.69 (t, J = 6.3 Hz, 1H, NH), 11.44 (s, 1H, OH); **<sup>13</sup>C NMR** (125.75 MHz, DMSO-d<sub>6</sub>):  $\delta$  (ppm) 45.2, 57.7, 104.4, 116.8, 128.2, 128.4, 130.3, 130.9, 135.0, 144.3, 152.6, 162.5; **MS** (APCI) m/z calculated for C<sub>13</sub>H<sub>15</sub>N<sub>2</sub>O<sub>3</sub>S 279.1 [M+H]<sup>+</sup>, found 279.2.

**Propane-1-sulfonic acid (5,6-dimethyl-3-oxo-2,3-dihydro-pyridazin-4-ylmethyl)-amide (3{2,19})**

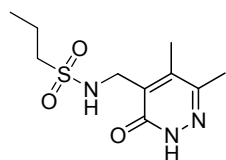

Yellowish solid, mp 135-137°C; **FTIR** (KBr):  $\nu_{\text{max}}$  (cm<sup>-1</sup>) 3307, 3254 (NH), 2997, 2964, 2940, 2881 (CH), 1138 (SO<sub>2</sub>); **<sup>1</sup>H NMR** (500 MHz, DMSO-d<sub>6</sub>):  $\delta$  (ppm) 0.94 (t, J = 7.4 Hz, 3H, CH<sub>3</sub>), 1.63 (m, 2H, CH<sub>2</sub>), 2.17 (s, 3H, CH<sub>3</sub>), 2.20 (s, 3H, CH<sub>3</sub>), 3.04 (t, J = 7.8 Hz, 2H, CH<sub>2</sub>), 4.05 (d, J = 5.6 Hz, 2H, CH<sub>2</sub>), 7.12 (t, J = 5.6 Hz, 1H, NH), 12.7 (s, 1H, OH); **<sup>13</sup>C NMR** (125.75 MHz, DMSO-d<sub>6</sub>):  $\delta$  (ppm) 12.8, 15.3,

17.0, 19.7, 36.9, 52.6, 133.5, 141.8, 145.3, 160.5; **MS** (APCI)  $m/z$  calculated for  $C_{10}H_{18}N_3O_3S$  260.1  $[M+H]^+$ , found 260.2.

**2-Methoxy-ethanesulfonic acid cycloheptylamide (3{4,26})**

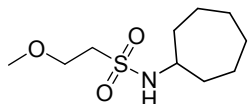

Yellowish solid, mp 37-39°C; **FTIR** (KBr):  $\nu_{\max}$  ( $cm^{-1}$ ) 3260 (NH), 2931, 2859 (CH), 1160 ( $SO_2$ );  **$^1H$  NMR** (500 MHz,  $DMSO-d_6$ ):  $\delta$  (ppm) 1.46 (m, 10H,  $5CH_2$ ), 1.84 (m, 2H,  $CH_2$ ), 3.25 (m, 6H, CH +  $CH_2$  +  $OCH_3$ ), 3.63 (t,  $J = 6.3$  Hz, 2H,  $CH_2$ ), 7.01 (d,  $J = 7.0$  Hz, 1H, NH);  **$^{13}C$  NMR** (125.75 MHz,  $DMSO-d_6$ ):  $\delta$  (ppm) 23.3, 27.8, 35.9, 51.9, 54.2, 58.1, 66.3; **MS** (APCI)  $m/z$  calculated for  $C_{10}H_{22}NO_3S$  236.1  $[M+H]^+$ , found 236.1.

**C-(4-Bromo-2-fluoro-phenyl)-N-cycloheptyl-methanesulfonamide (3{6,26})**

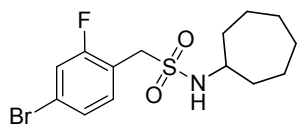

Whitish solid, mp 120-122°C; **FTIR** (KBr):  $\nu_{\max}$  ( $cm^{-1}$ ) 3260 (NH), 3110, 3089, 3047, 2933, 2908, 2858, 2822 (CH), 1160 ( $SO_2$ );  **$^1H$  NMR** (500 MHz,  $DMSO-d_6$ ):  $\delta$  (ppm) 1.34 (m, 2H,  $CH_2$ ), 1.47 (m, 8H,  $4CH_2$ ), 1.85 (m, 2H,  $CH_2$ ), 3.27 (m, 1H, CH), 4.31 (s, 2H,  $CH_2$ ), 7.22 (d,  $J = 7.5$  Hz, 1H, Ar), 7.4 (t, 1H, Ar), 7.46 (d,  $J = 8$  Hz, 1H, Ar), 7.59 (d,  $J = 9$  Hz, 1H, NH);  **$^{13}C$  NMR** (125.75 MHz,  $DMSO-d_6$ ):  $\delta$  (ppm) 23.4, 27.8, 35.8, 51.3, 54.6, 117.8 (d,  $J_{C,F} = 15$  Hz), 118.9 (d,  $J_{C,F} = 25$  Hz), 121.9 (d,  $J_{C,F} = 10$  Hz), 127.6 (d,  $J_{C,F} = 3.8$  Hz), 134.6 (d,  $J_{C,F} = 3.8$  Hz), 160.8 (d,  $J_{C,F} = 252$  Hz); **MS** (APCI)  $m/z$  calculated for  $C_{14}H_{20}BrFNO_2S$  265.1  $[M+H]^+$ , found 365.5.

**N-(1-Methyl-3-phenyl-propyl)-C-phenyl-methanesulfonamide (3{5,28})**

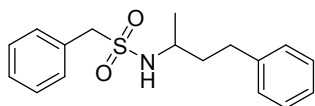

Whitish solid, mp 108-110°C; **FTIR** (KBr):  $\nu_{\max}$  ( $cm^{-1}$ ) 3293 (NH), 3087, 3062, 3031, 2973, 2943, 2925, 2860 (CH), 1164 ( $SO_2$ );  **$^1H$  NMR** (500 MHz,  $DMSO-d_6$ ):  $\delta$  (ppm) 1.13 (d,  $J = 6.7$  Hz, 3H,  $CH_3$ ),

1.66 (m, 2H, CH<sub>2</sub>), 2.58 (m, 2H, CH<sub>2</sub>), 3.30 (m, 1H, CH), 4.30 (d, J = 2.9 Hz, 2H, CH<sub>2</sub>), 7.10 (d, J = 7.8 Hz, 1H, NH), 7.17 (m, 3H, Ar), 7.27 (m, 2H, Ar), 7.36 (m, 5H, Ar); <sup>13</sup>C NMR (125.75 MHz, DMSO-d<sub>6</sub>): δ (ppm) 22.0, 31.7, 52.3, 58.7, 125.8, 128.0, 128.3, 128.3, 128.4, 130.7, 130.9, 142.0; MS (APCI) m/z calculated for C<sub>17</sub>H<sub>22</sub>NO<sub>2</sub>S 304.1 [M+H]<sup>+</sup>, found 304.2.

**Benzo[1,3]dioxol-5-yl-(4-methanesulfonyl-piperazin-1-yl)-methanone (3{1,31})**

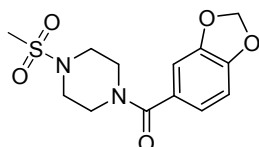

Yellowish solid, mp 200-202°C; FTIR (KBr): ν<sub>max</sub> (cm<sup>-1</sup>) 3028, 3014, 3000, 2925, 2912, 2893, 2866 (CH), 1154 (SO<sub>2</sub>); <sup>1</sup>H NMR (500 MHz, DMSO-d<sub>6</sub>): δ (ppm) 2.89 (s, 3H, CH<sub>3</sub>), 3.14 (m, 4H, 2CH<sub>2</sub>), 3.56 (m, 4H, 2CH<sub>2</sub>), 6.07(s, 2H, CH<sub>2</sub>), 6.93 (d, J = 7.8 Hz, 1H, Ar), 6.98 (d, J = 7.8 Hz, 1H, Ar), 6.99 (s, 1H, Ar); <sup>13</sup>C NMR (125.75 MHz, DMSO-d<sub>6</sub>): δ (ppm) 34.2, 45.4, 101.6, 107.8, 108.3, 121.6, 129.1, 147.3, 148.5, 168.8; MS (APCI) m/z calculated for C<sub>13</sub>H<sub>17</sub>N<sub>2</sub>O<sub>5</sub>S 313.4 [M+H]<sup>+</sup>, found 313.0.

**N-(2-Methyl-1-phenyl-propyl)-C-phenyl-methanesulfonamide (3{5,32})**

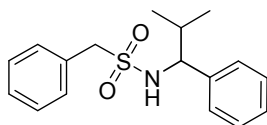

Whitish solid, mp 87-89°C; FTIR (KBr): ν<sub>max</sub> (cm<sup>-1</sup>) 3264 (NH), 3061, 3039, 2972, 2959, 2928, 2905, 2870 (CH), 1167 (SO<sub>2</sub>); <sup>1</sup>H NMR (500 MHz, DMSO-d<sub>6</sub>): δ (ppm) 0.67 (d, J = 6.9 Hz, 3H, CH<sub>3</sub>), 0.97 (d, J = 6.6 Hz, 3H, CH<sub>3</sub>), 1.92 (m, 1H, CH), 3.84 (s, 2H, CH<sub>2</sub>), 4.0 (t, J = 9.1 Hz, 1H, CH), 6.98 (d, J = 6.9 Hz, 2H, Ar), 7.24 (m, 3H, Ar), 7.29 (m, 1H, Ar), 7.36 (m, 4H, Ar), 7.78 (d, J = 9.6 Hz, 1H, NH); <sup>13</sup>C NMR (125.75 MHz, DMSO-d<sub>6</sub>): δ (ppm) 19.6, 19.7, 33.8, 58.9, 63.9, 127.2, 127.5, 127.9, 128.1, 128.3, 130.1, 130.7, 142.3; MS (APCI) m/z calculated for C<sub>17</sub>H<sub>22</sub>NO<sub>2</sub>S 304.1 [M+H]<sup>+</sup>, found 304.2.

***C*-(4-Bromo-2-fluoro-phenyl)-*N*-(2-methyl-1-phenyl-propyl)-methanesulfonamide (3{6,32})**

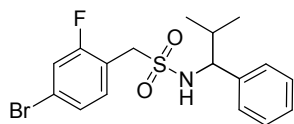

White solid, mp 120-122°C; **FTIR** (KBr):  $\nu_{\max}$  (cm<sup>-1</sup>) 3261 (NH), 2979, 2965, 2938, 2874 (CH), 1160 (SO<sub>2</sub>); **<sup>1</sup>H NMR** (500 MHz, DMSO-d<sub>6</sub>):  $\delta$  (ppm) 0.68 (d, J=6.5 Hz, 3H, CH<sub>3</sub>), 0.96 (d, J=6.5 Hz, 3H, CH<sub>3</sub>), 1.9 (m, 1H, CH), 3.82 (d, J=13.5 Hz, 1H, CH<sub>2</sub>), 3.91 (d, J=13.5 Hz, 1H, CH<sub>2</sub>), 3.99 (t, J = 8.5 Hz, 1H, CH), 6.99 (t, J = 8.5 Hz, 1H, Ar), 7.31 (m, 6H, Ar), 7.42 (d, J = 9.5 Hz, 1H, Ar), 7.99 (d, J=9 Hz, 1H, NH); **<sup>13</sup>C NMR** (125.75 MHz, DMSO-d<sub>6</sub>):  $\delta$  (ppm) 19.5, 33.9, 51.9, 64.0, 117.1 (d, J<sub>C,F</sub> = 14 Hz), 118.8 (d, J<sub>C,F</sub> = 25 Hz), 121.9 (d, J<sub>C,F</sub> = 10 Hz), 127.2, 127.3, 128.4 (d, J<sub>C,F</sub> = 3.8 Hz), 134.1 (d, J<sub>C,F</sub> = 3.8 Hz), 141.9, 160.6 (d, J<sub>C,F</sub> = 253 Hz). **MS** (APCI) m/z calculated for C<sub>17</sub>H<sub>20</sub>BrFNO<sub>2</sub>S 401.0 [M+H]<sup>+</sup>, found 401.0.

***N*-(Cyclopropyl-phenyl-methyl)-methanesulfonamide (3{1,33})**

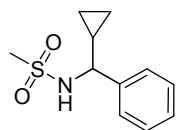

Whitish solid, mp 70-72°C; **FTIR** (KBr):  $\nu_{\max}$  (cm<sup>-1</sup>) 3302 (NH), 3087, 3065, 3034, 3005, 2930 (CH), 1157 (SO<sub>2</sub>); **<sup>1</sup>H NMR** (500 MHz, DMSO-d<sub>6</sub>):  $\delta$  (ppm) 0.32 (m, 1H, CH<sub>2</sub>), 0.42 (m, 2H, CH<sub>2</sub>), 0.55 (m, 1H, CH<sub>2</sub>), 1.13 (m, 1H, CH), 2.59 (s, 3H, CH<sub>3</sub>), 3.70 (t, J = 7.7 Hz, 1H, CH), 7.25 (t, J = 7.1 Hz, 1H, Ar), 7.34 (t, J = 7.4 Hz, 2H, Ar), 7.40 (d, J = 7.4 Hz, 2H, Ar), 7.82 (d, J = 6.9 Hz, 1H, NH); **<sup>13</sup>C NMR** (125.75 MHz, DMSO-d<sub>6</sub>):  $\delta$  (ppm) 3.8, 4.8, 18.3, 41.5, 61.4, 126.9, 127.2, 128.4, 142.9; **MS** (APCI) m/z calculated for C<sub>11</sub>H<sub>16</sub>NO<sub>2</sub>S 226.1 [M+H]<sup>+</sup>, found 226.3.

**N-Benzhydryl-methanesulfonamide (3{1,34})**

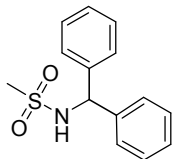

Yellowish solid, mp 133-135°C; **FTIR** (KBr):  $\nu_{\max}$  (cm<sup>-1</sup>) 3300 (NH), 3087, 3065, 3021, 2925, 2862 (CH), 1152 (SO<sub>2</sub>); **<sup>1</sup>H NMR** (500 MHz, DMSO-d<sub>6</sub>):  $\delta$  (ppm) 2.63 (s, 3H, CH<sub>3</sub>), 5.63 (d, J = 9.7 Hz, 1H, CH), 7.24 (t, J = 7.3 Hz, 2H, Ar), 7.34 (t, J = 7.8 Hz, 4H, Ar), 7.4 (d, J = 7.5 Hz, 4H, Ar), 8.33 (d, J = 9.6 Hz, 1H, NH); **<sup>13</sup>C NMR** (125.75 MHz, DMSO-d<sub>6</sub>):  $\delta$  (ppm) 41.4, 60.5, 127.2, 127.3, 128.6, 142.3; **MS** (APCI) m/z calculated for C<sub>14</sub>H<sub>14</sub>NO<sub>2</sub>S 260.1 [M-H]<sup>-</sup>, found 260.0.

**N-Benzhydryl-C-(4-bromo-2-fluoro-phenyl)-methanesulfonamide (3{6,34})**

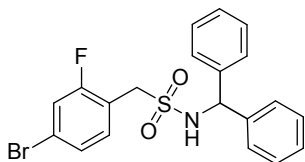

White solid, mp 125-127°C; **FTIR** (KBr):  $\nu_{\max}$  (cm<sup>-1</sup>) 3235 (NH), 3089, 3068, 3032, 2935 (CH), 1154 (SO<sub>2</sub>); **<sup>1</sup>H NMR** (500 MHz, DMSO-d<sub>6</sub>):  $\delta$  (ppm) 4.13 (s, 2H, CH<sub>2</sub>), 5.61 (s, 1H, CH), 7.06 (t, J=8.5 Hz, 1H, Ar), 7.25 (m, 2H, Ar), 7.29 (d, J= 8.0 Hz, 1H, Ar), 7.34 (m, 8H, Ar), 7.42 (dd, J= 1.6, 9.6 Hz, 1H, Ar), 8.62 (br s, 1H, NH); **<sup>13</sup>C NMR** (125.75 MHz, DMSO-d<sub>6</sub>):  $\delta$  (ppm) 52.0, 60.7, 117.0 (d, J<sub>C,F</sub> = 15 Hz), 118.9 (d, J<sub>C,F</sub> = 25 Hz), 122.0 (d, J<sub>C,F</sub> = 10 Hz), 127.2, 127.3, 127.4 (d, J<sub>C,F</sub> = 3.8 Hz), 128.5, 134.1 (d, J<sub>C,F</sub> = 3.8 Hz), 142.4, 160.7 (d, J<sub>C,F</sub> = 252 Hz); **MS** (APCI) m/z calculated for C<sub>20</sub>H<sub>18</sub>BrFNO<sub>2</sub>S 235.1 [M+H]<sup>+</sup>, found 435.2.

**2-Methoxy-ethanesulfonic acid (1-phenyl-cyclobutyl)-amide (3{4,35})**

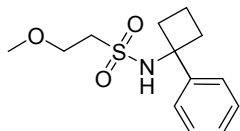

Yellowish solid, mp 52-54°C; **FTIR** (KBr):  $\nu_{\max}$  (cm<sup>-1</sup>) 3266 (NH), 3088, 3060, 3032, 2998, 2983, 2939, 2901, 2883, (CH), 1149 (SO<sub>2</sub>); **<sup>1</sup>H NMR** (500 MHz, DMSO-d<sub>6</sub>):  $\delta$  (ppm) 1.64 (m, 1H, CH<sub>2</sub>), 2.02

(m, 1H, CH<sub>2</sub>), 2.35 (t, J = 6.9 Hz, 2H, CH<sub>2</sub>), 2.46 (m, 2H, CH<sub>2</sub>), 2.54 (m, 2H, CH<sub>2</sub>), 3.07 (s, 3H, OCH<sub>3</sub>), 3.37 (t, J = 7.0 Hz, 2H, CH<sub>2</sub>), 7.28 (t, J = 7.2 Hz, 1H, Ar), 7.38 (t, J = 7.5 Hz, 2H, Ar), 7.43 (d, J = 7.2 Hz, 2H, Ar), 7.90 (s, 1H, NH); <sup>13</sup>C NMR (125.75 MHz, DMSO-d<sub>6</sub>): δ (ppm) 15.3, 34.5, 52.8, 57.8, 60.7, 65.7, 126.5, 127.2, 128.2; **MS** (APCI) m/z calculated for C<sub>13</sub>H<sub>20</sub>NO<sub>3</sub>S 270.1 [M+H]<sup>+</sup>, found 270.0.

***N*-[1-(4-Bromo-phenyl)-cyclopropyl]-C-cyclohexyl-methanesulfonamide (3{3,36})**

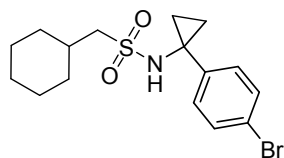

Yellowish solid, mp 70-72°C; **FTIR** (KBr): ν<sub>max</sub> (cm<sup>-1</sup>) 3251 (NH), 3009, 2947, 2922, 2851 (CH), 1148 (SO<sub>2</sub>); <sup>1</sup>H NMR (500 MHz, DMSO-d<sub>6</sub>): δ (ppm) 0.85 (m, 2H, CH<sub>2</sub>), 1.11 (m, 5H, 2CH<sub>2</sub> + CH), 1.26 (m, 2H, CH<sub>2</sub>), 1.56 (m, 6H, 3CH<sub>2</sub>), 2.52 (d, J = 5.5 Hz, 2H, CH<sub>2</sub>), 7.34 (d, J = 8.5 Hz, 2H, Ar), 7.50 (d, J = 8.5 Hz, 2H, Ar), 8.23 (s, 1H, NH); <sup>13</sup>C NMR (125.75 MHz, DMSO-d<sub>6</sub>): δ (ppm) 16.0, 25.4, 25.6, 32.2, 33.0, 36.7, 60.3, 119.7, 129.2, 131.1, 142.6; **MS** (APCI) m/z calculated for C<sub>16</sub>H<sub>23</sub>BrNO<sub>2</sub>S 373.1 [M+H]<sup>+</sup>, found 373.0.

***C*-(4-Bromo-2-fluoro-phenyl)-*N*-[1-(4-fluoro-phenyl)-cyclopropylmethyl]-methanesulfonamide (3{6,37})**

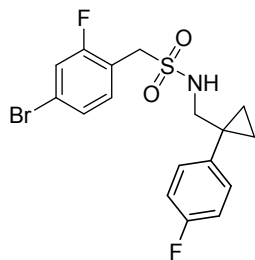

Whitish solid, mp 104-106°C; **FTIR** (KBr): ν<sub>max</sub> (cm<sup>-1</sup>) 3269 (NH), 3102, 3091, 3071, 3054, 3036, 3005, 2922, 2861 (CH), 1156 (SO<sub>2</sub>); <sup>1</sup>H NMR (500 MHz, DMSO-d<sub>6</sub>): δ (ppm) 0.73 (t, J = 5.4 Hz, 2H, CH<sub>2</sub>), 0.86 (t, J = 5.4 Hz, 2H, CH<sub>2</sub>), 3.16 (d, J = 6.0 Hz, 2H, CH<sub>2</sub>), 4.21 (s, 2H, CH<sub>2</sub>), 7.10 (t, J = 8.8 Hz, 2H, Ar), 7.27 (t, J = 8.2 Hz, 1H, Ar), 7.34 (q, J = 5.8 Hz, 2H, Ar), 7.4 (m, 2H, Ar), 7.56 (d, J = 9.3 Hz, 1H, NH). <sup>13</sup>C NMR (125.75 MHz, DMSO-d<sub>6</sub>): δ (ppm) 11.8, 24.6, 50.2, 51.0, 114.8 (d, J<sub>C,F</sub> = 20 Hz), 117.3 (d, J<sub>C,F</sub> = 15 Hz), 118.9 (d, J<sub>C,F</sub> = 25 Hz), 121.9 (d, J<sub>C,F</sub> = 10 Hz), 127.6 (d, J<sub>C,F</sub> = 2.5 Hz), 130.7 (d, J<sub>C,F</sub> =

7.5 Hz), 134.6 (d,  $J_{\text{C,F}} = 3.8$  Hz), 139.2 (d,  $J_{\text{C,F}} = 2.5$  Hz), 160.8 (d,  $J_{\text{C,F}} = 252$  Hz), 160.9 (d,  $J_{\text{C,F}} = 243$  Hz); **MS** (APCI)  $m/z$  calculated for  $\text{C}_{17}\text{H}_{17}\text{BrF}_2\text{NO}_2\text{S}$  417.0  $[\text{M}+\text{H}]^+$ , found 417.1.

# NMR spectra of the selected compounds.

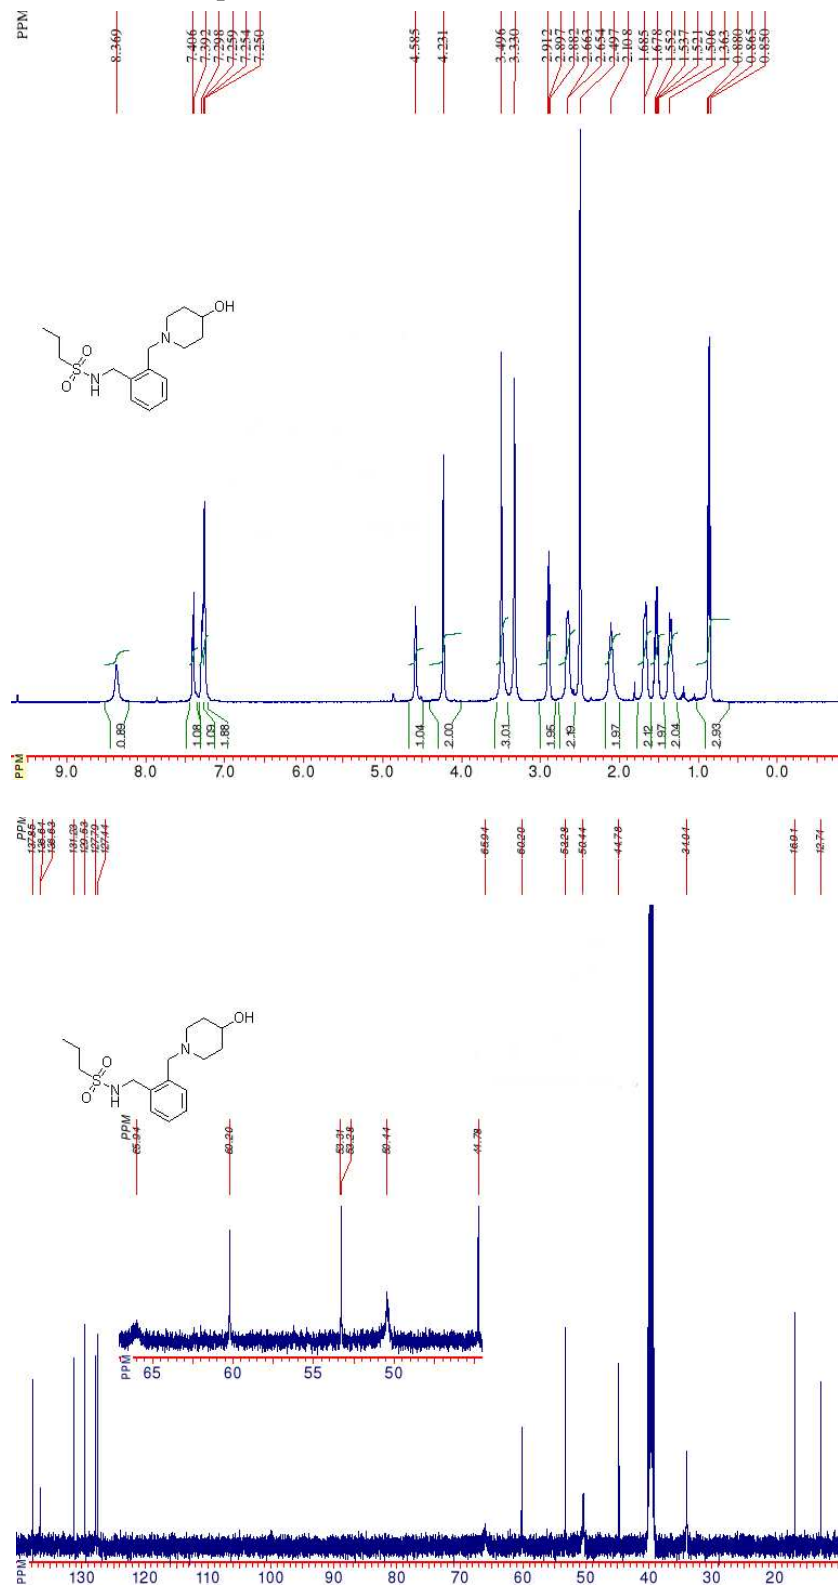

Figure S37



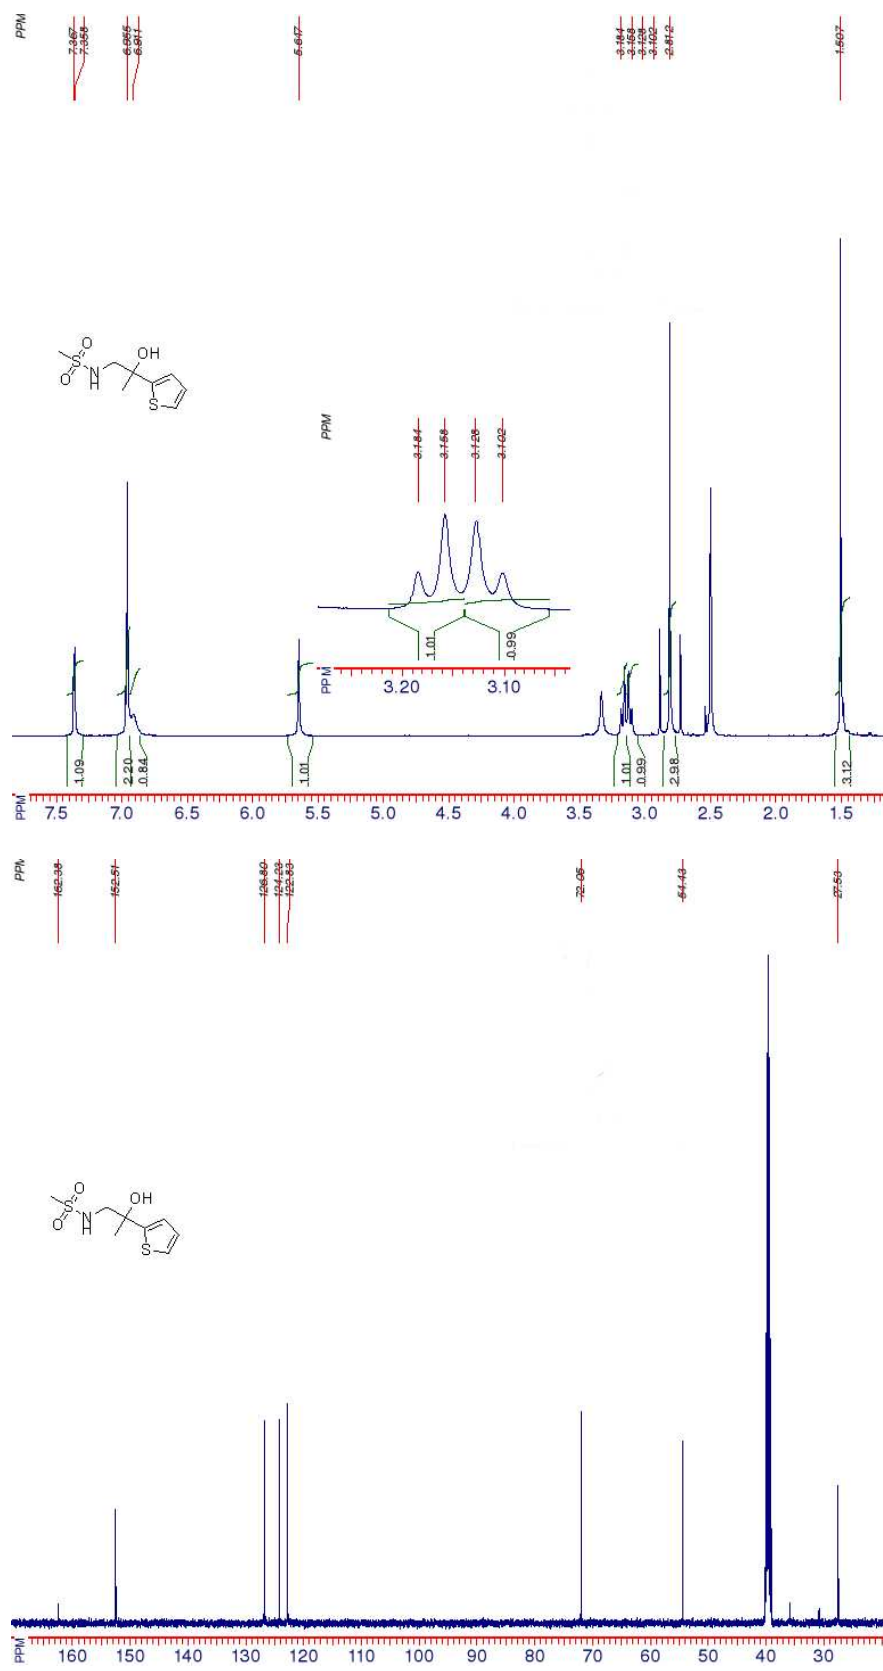

Figure S38

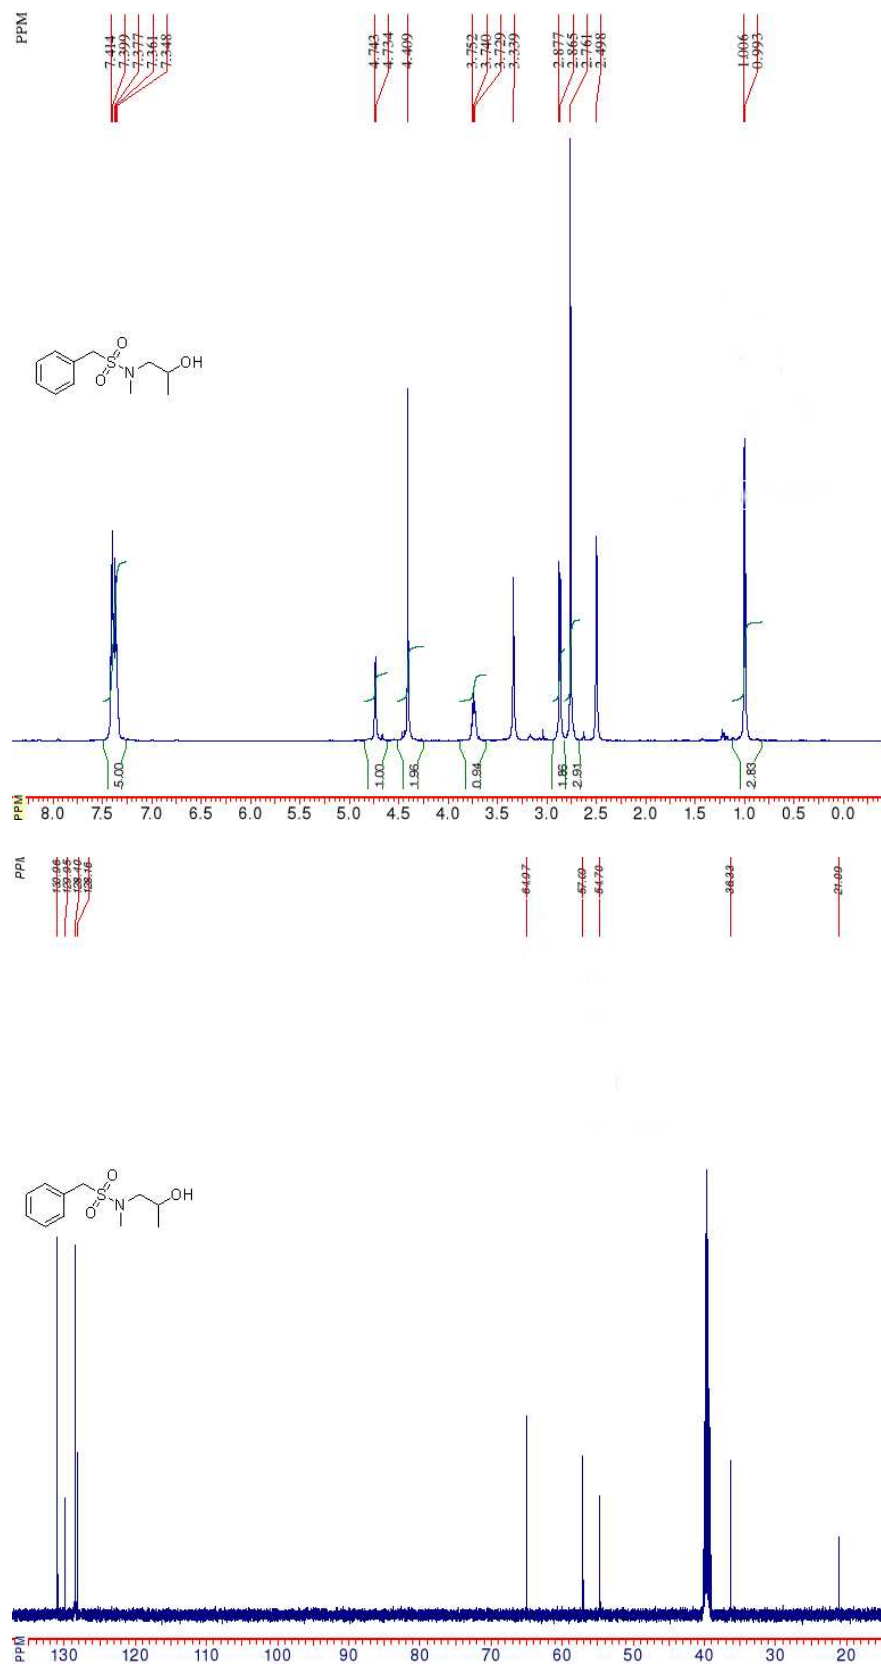

Figure S39

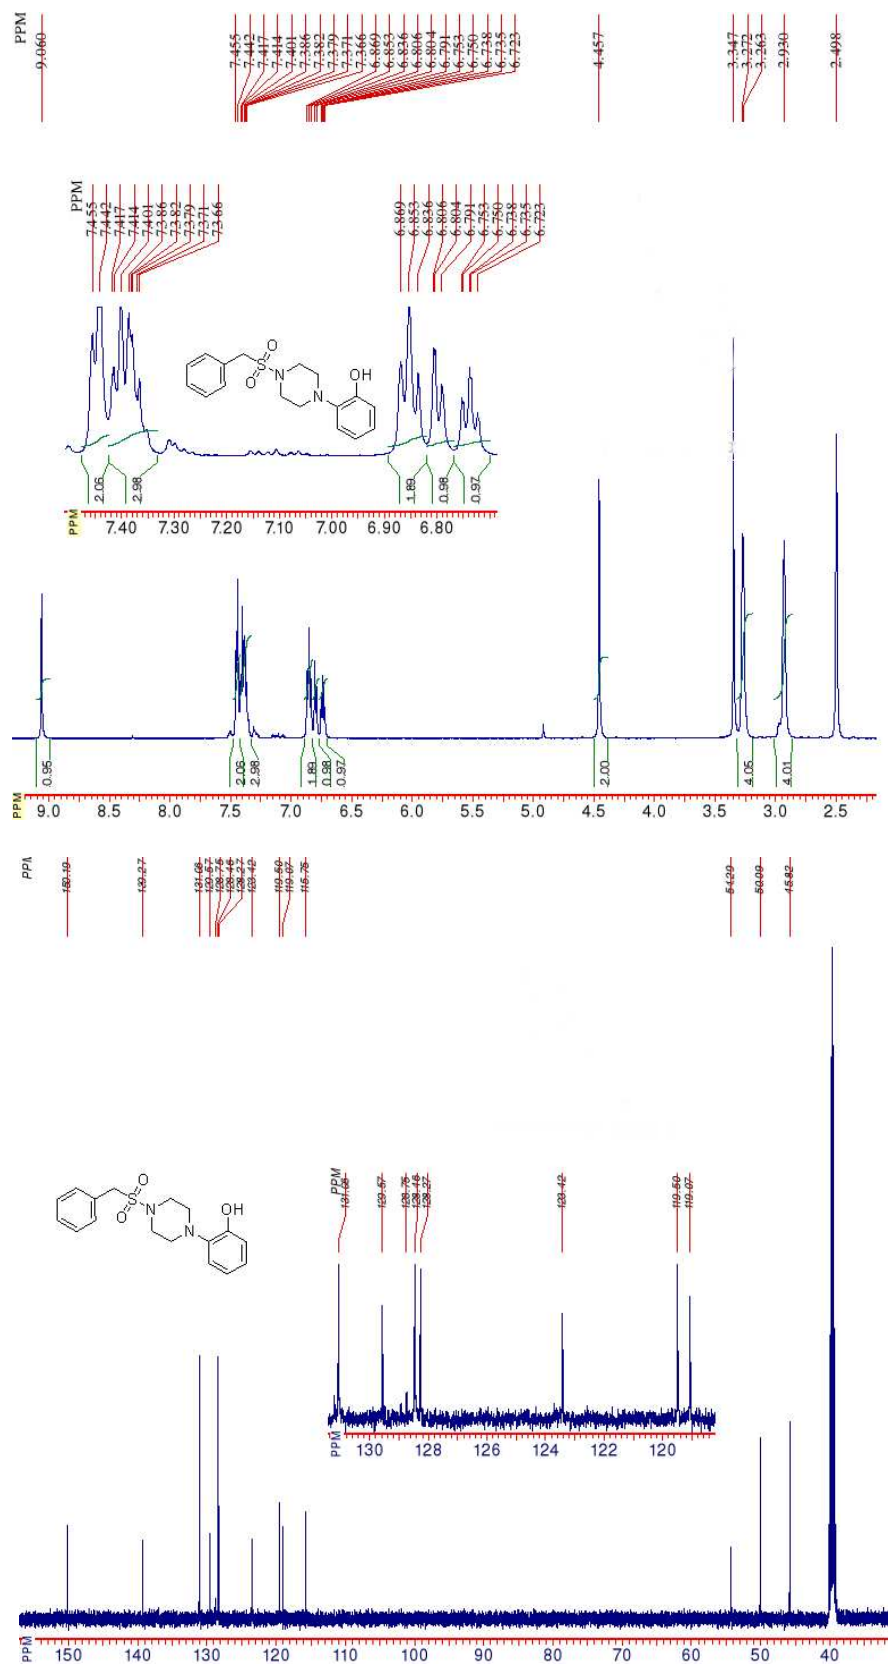

Figure S40

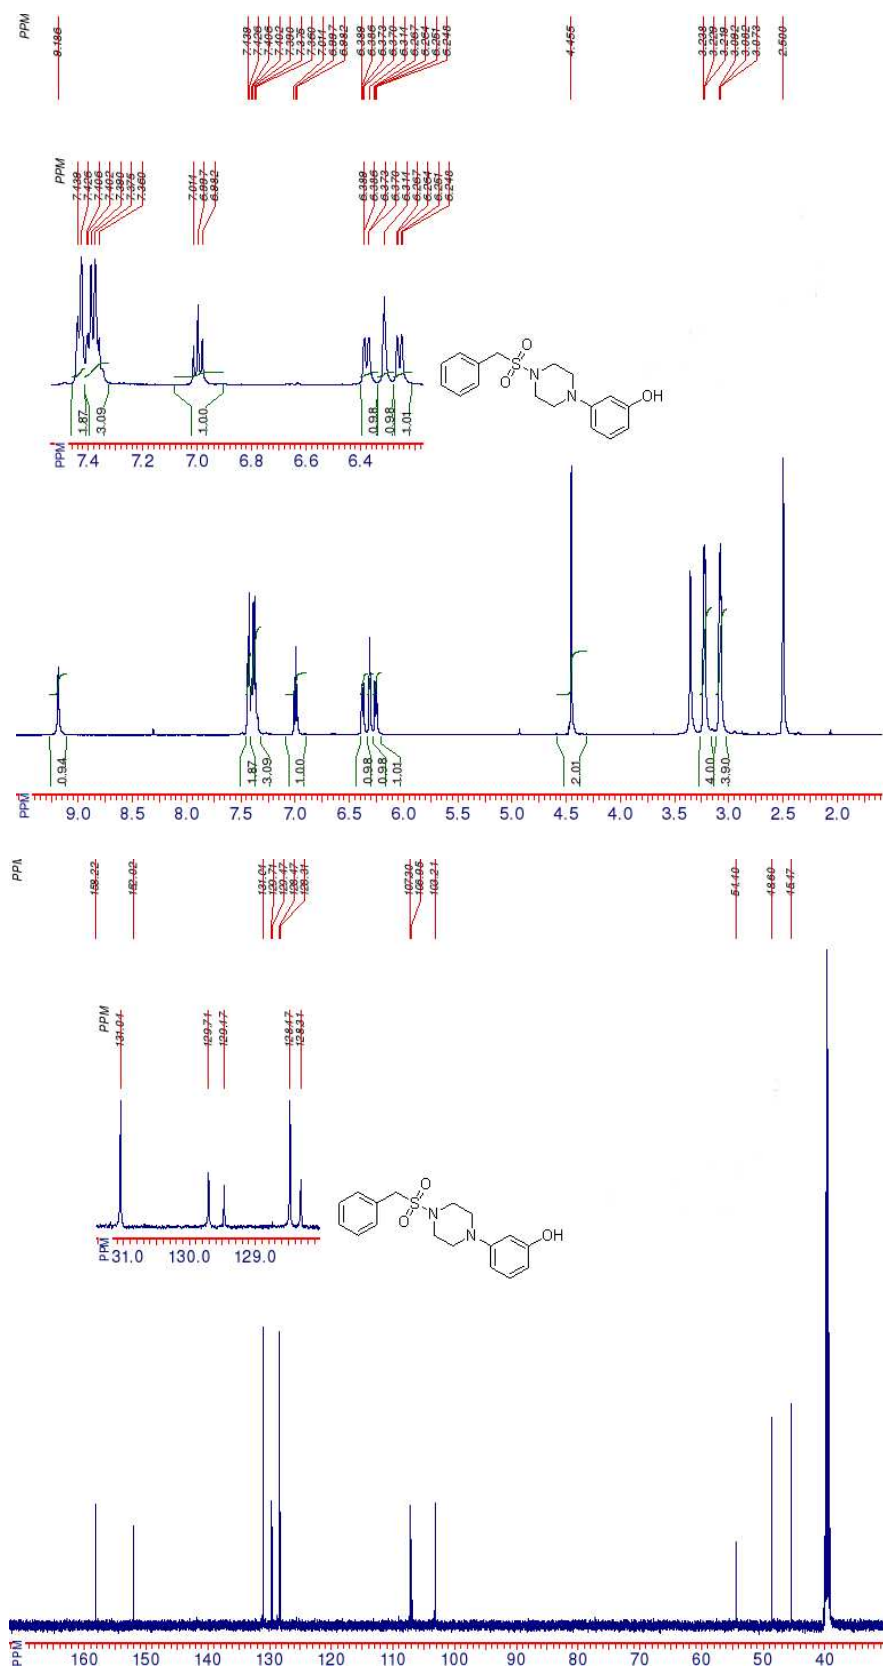

Figure S41

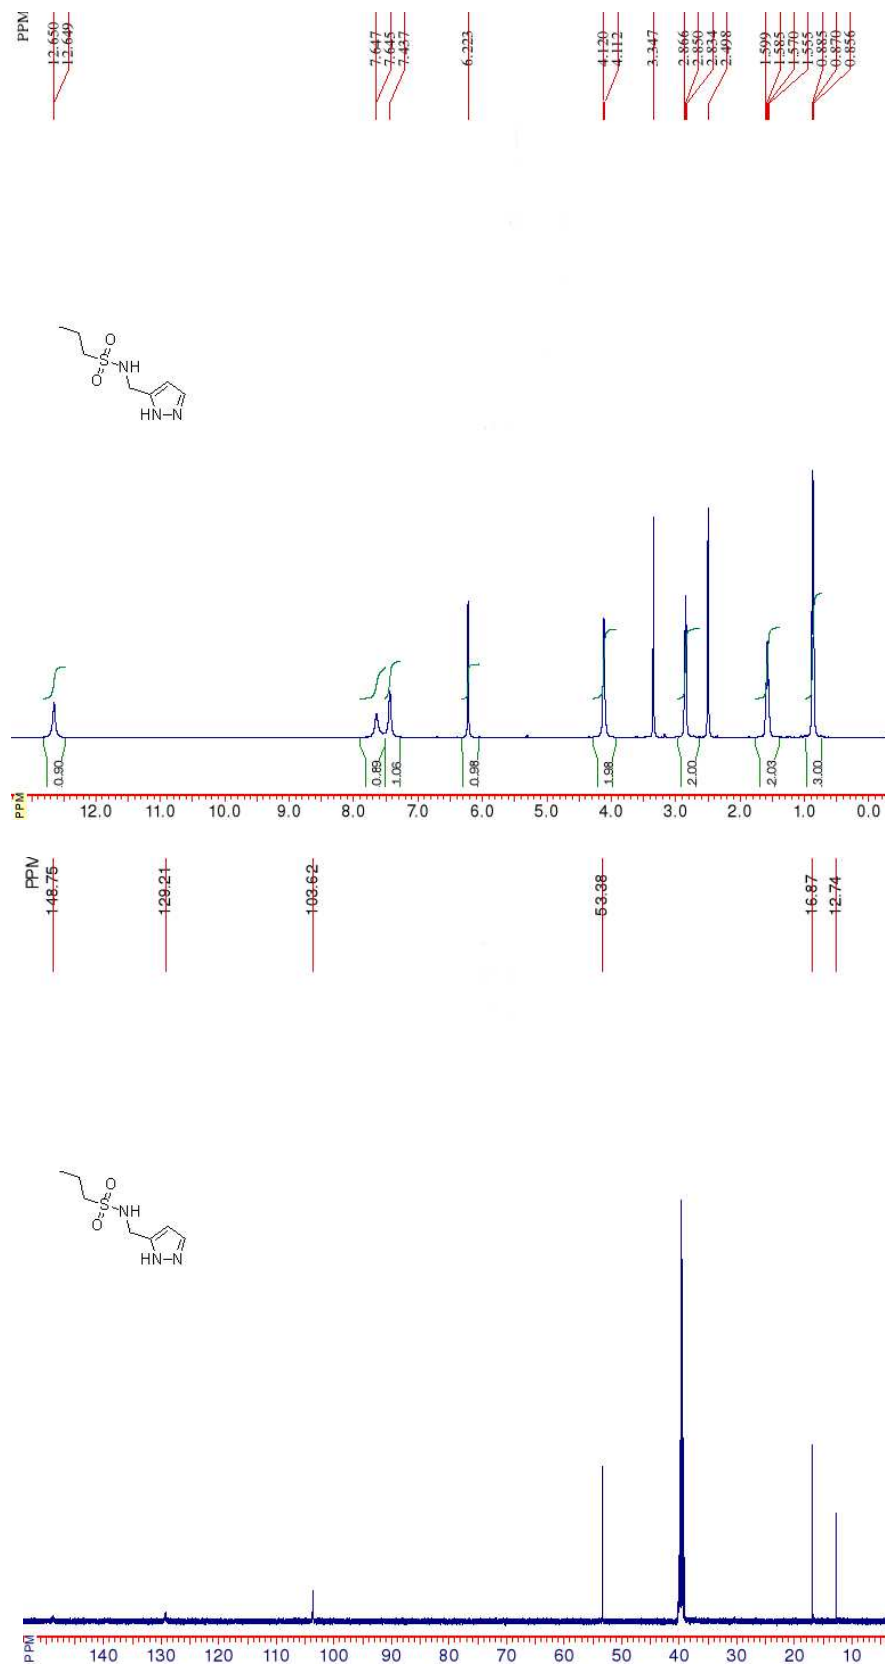

Figure S42

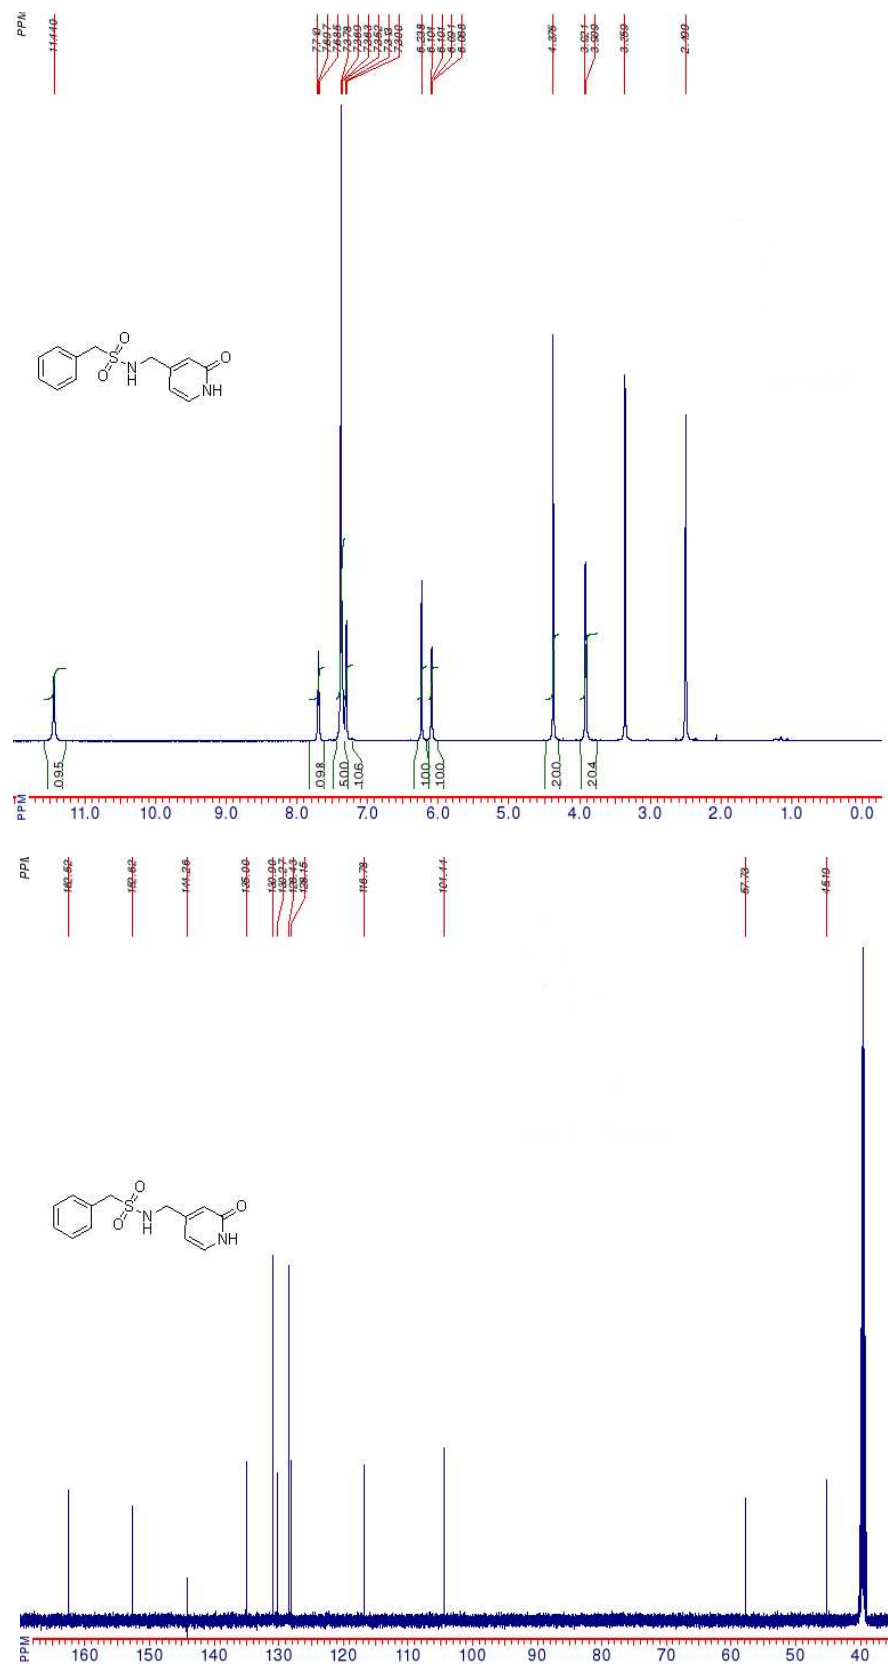

Figure S43

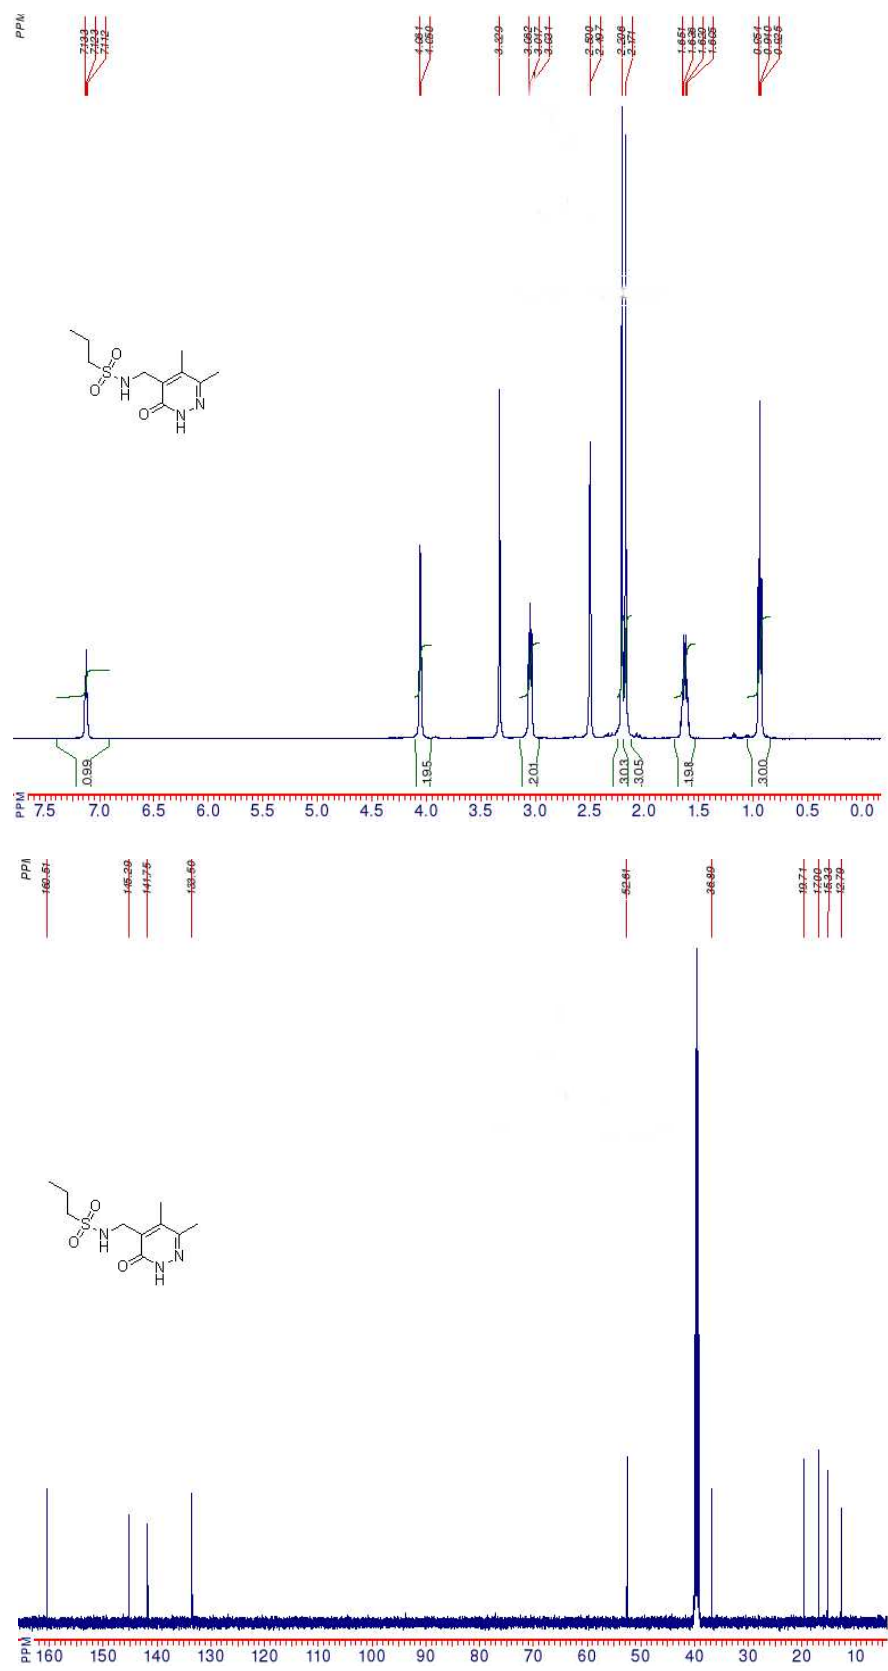

Figure S44

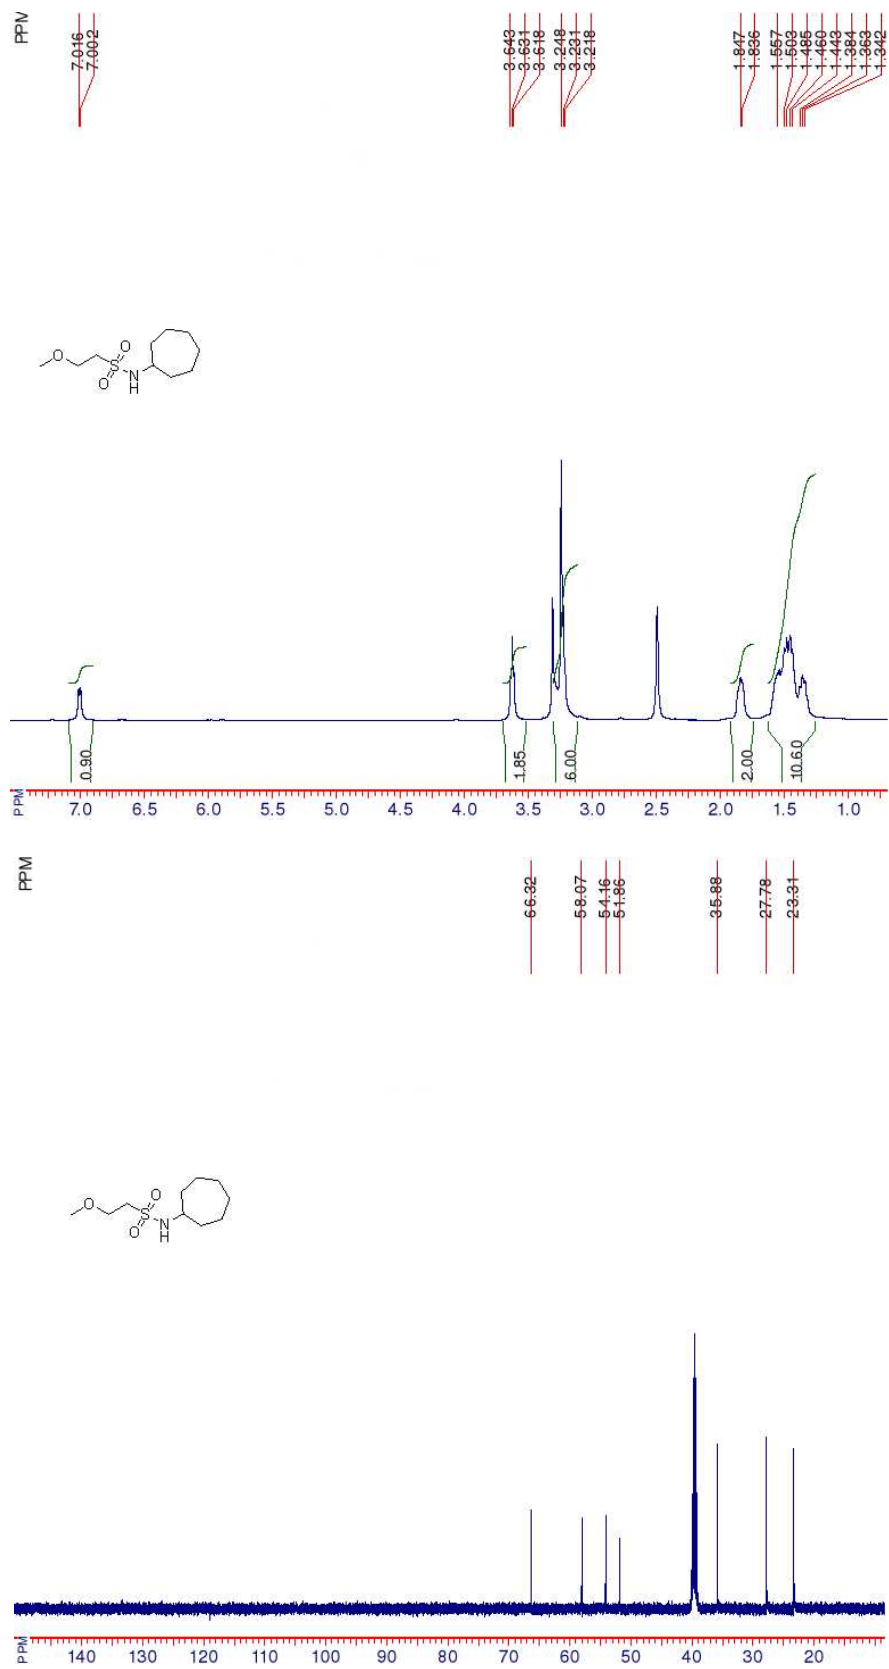

Figure S45



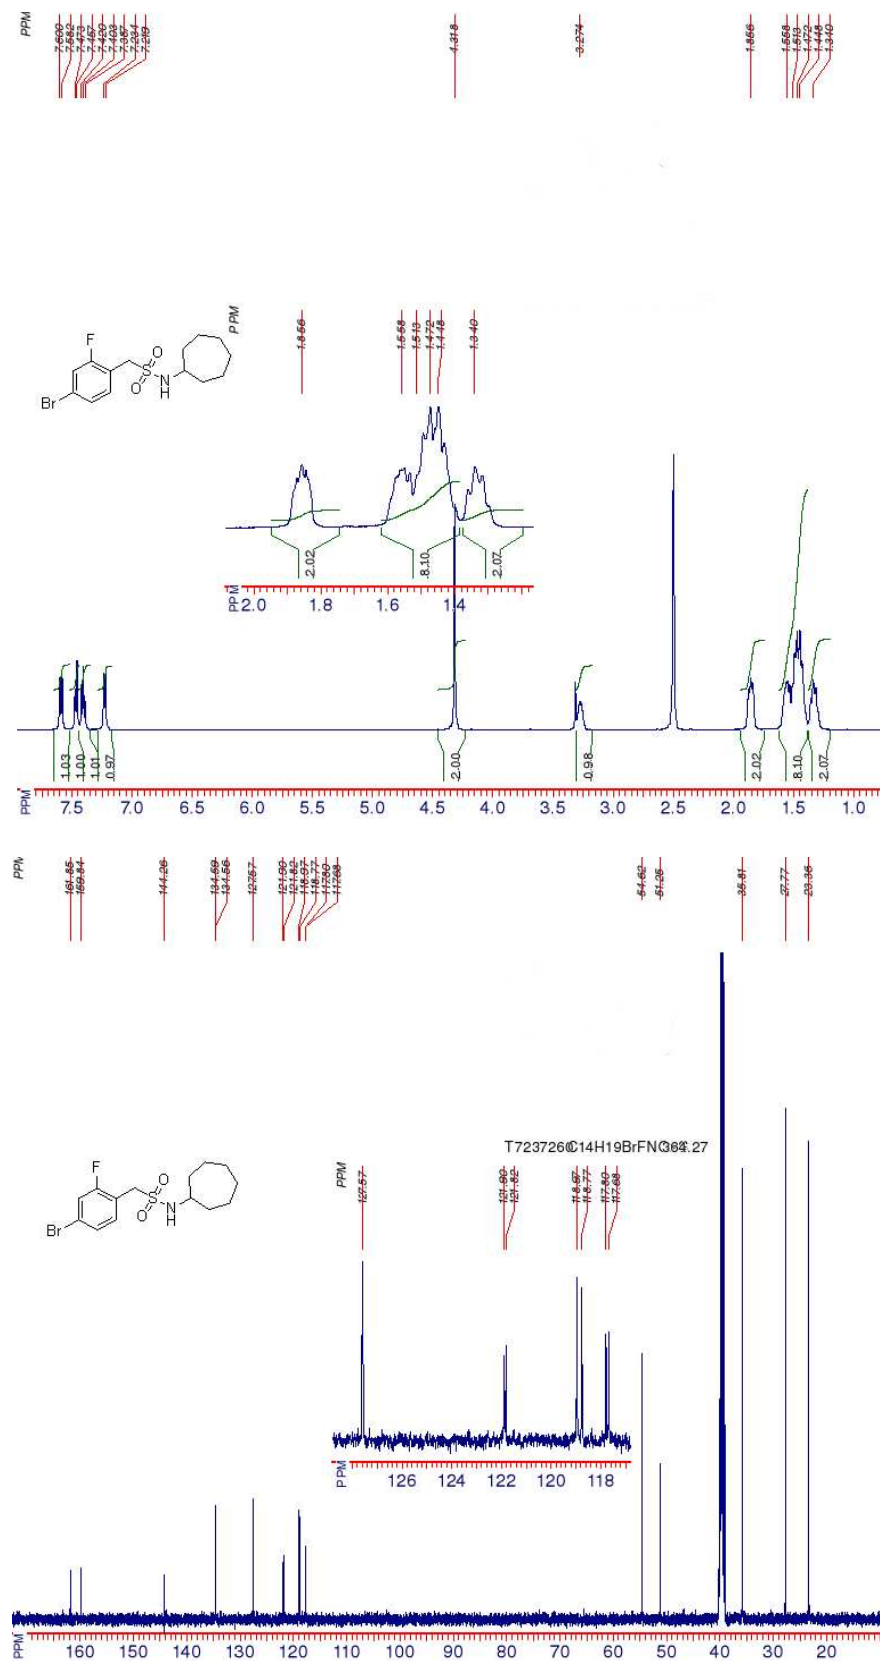



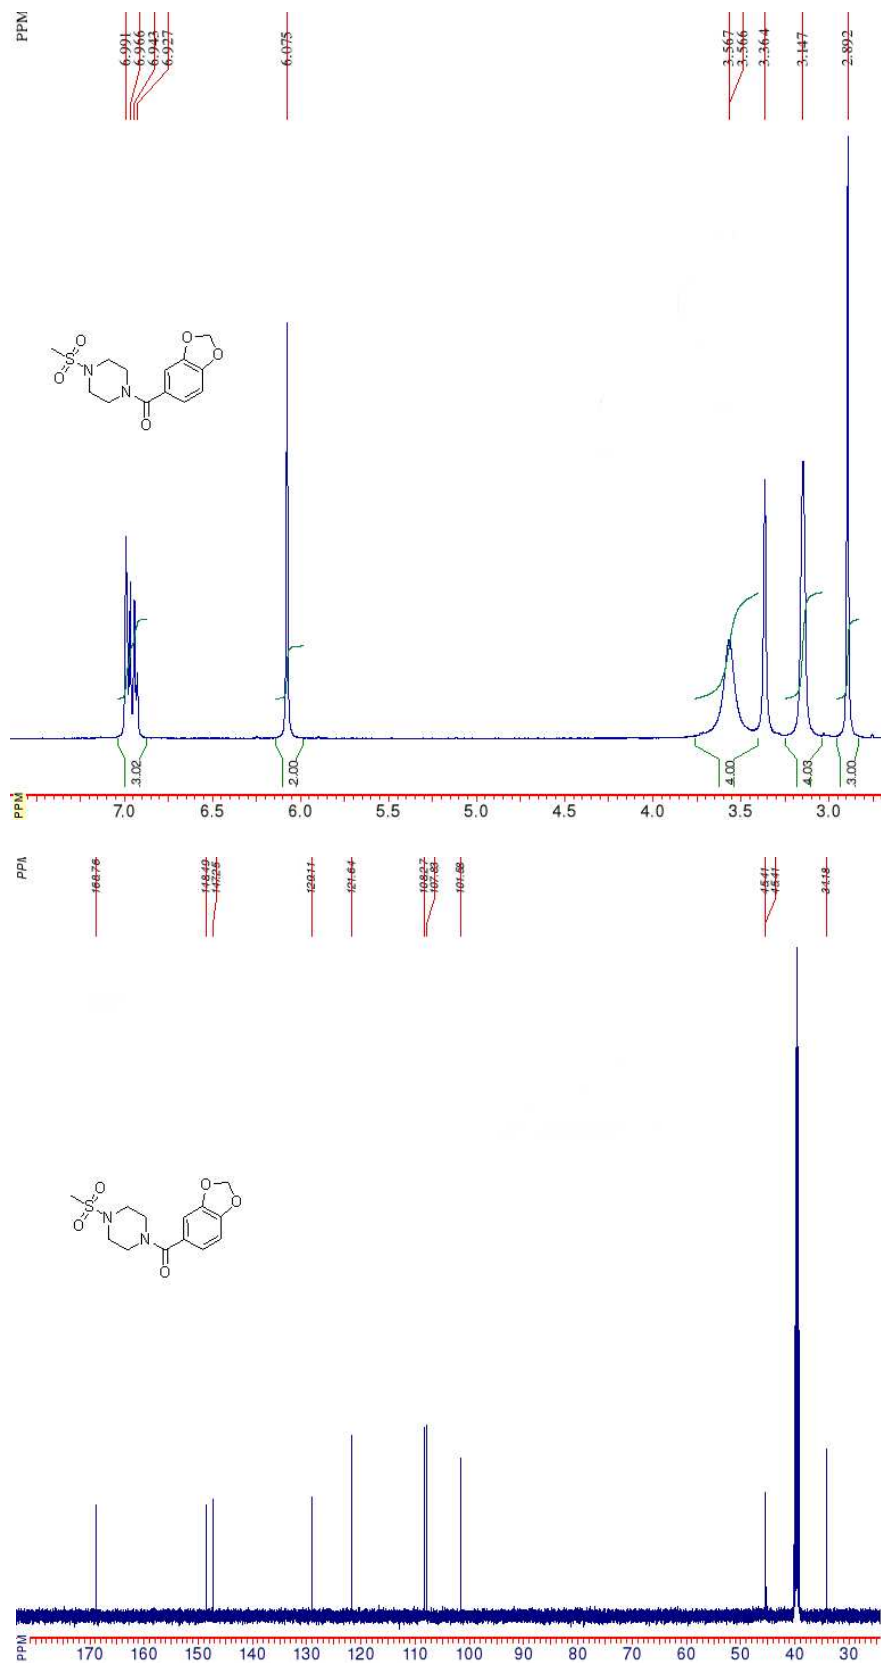

Figure S48



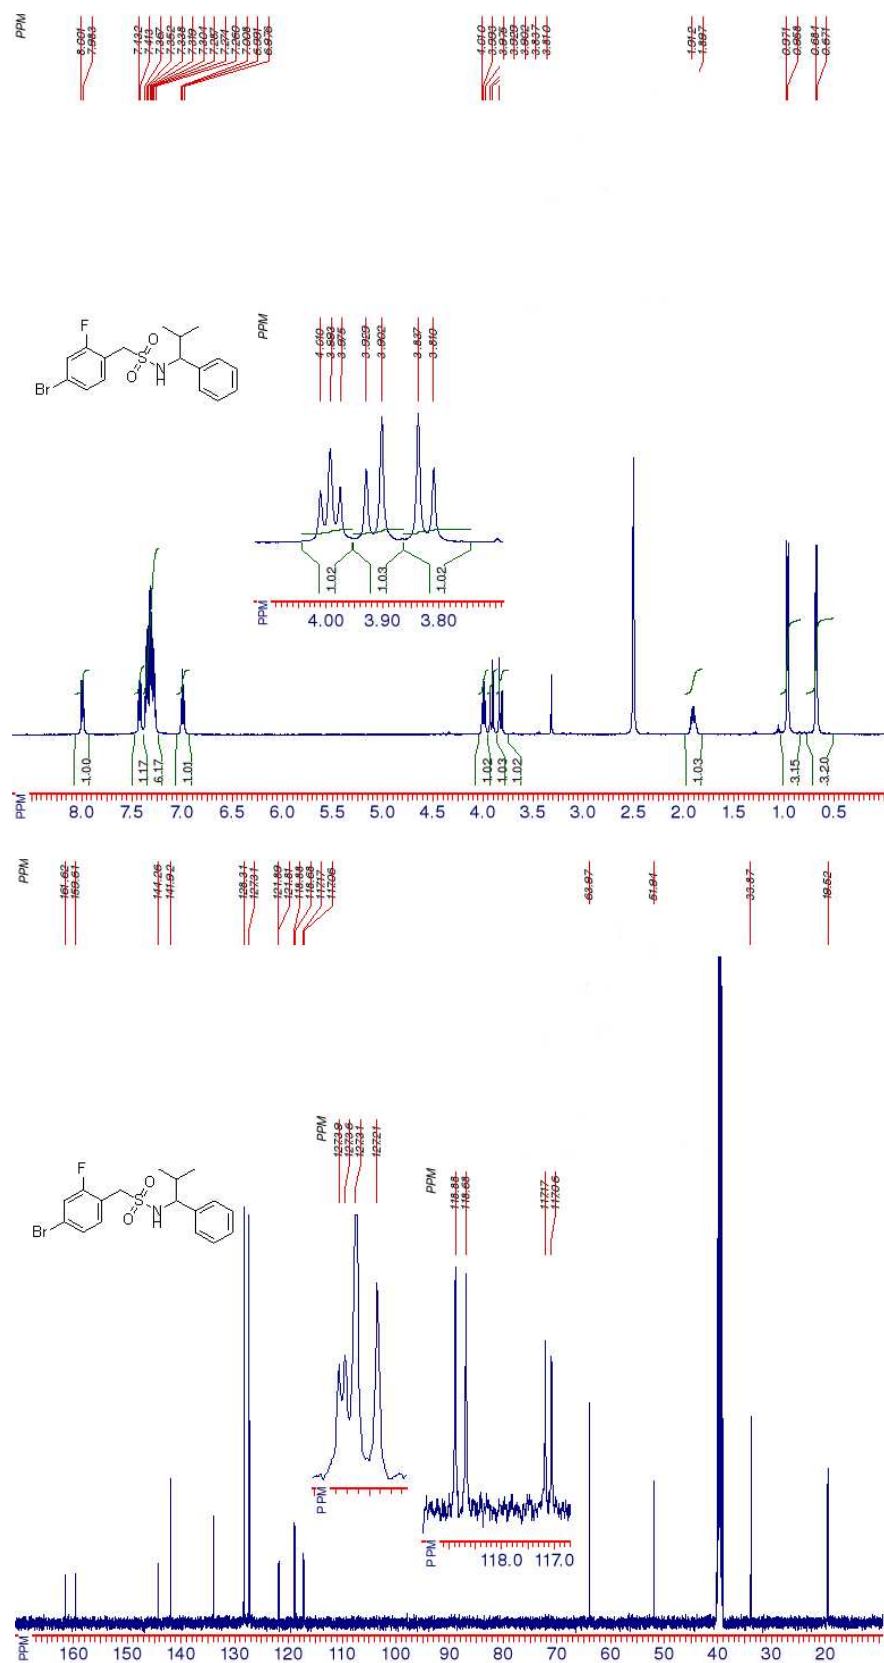

Figure S50

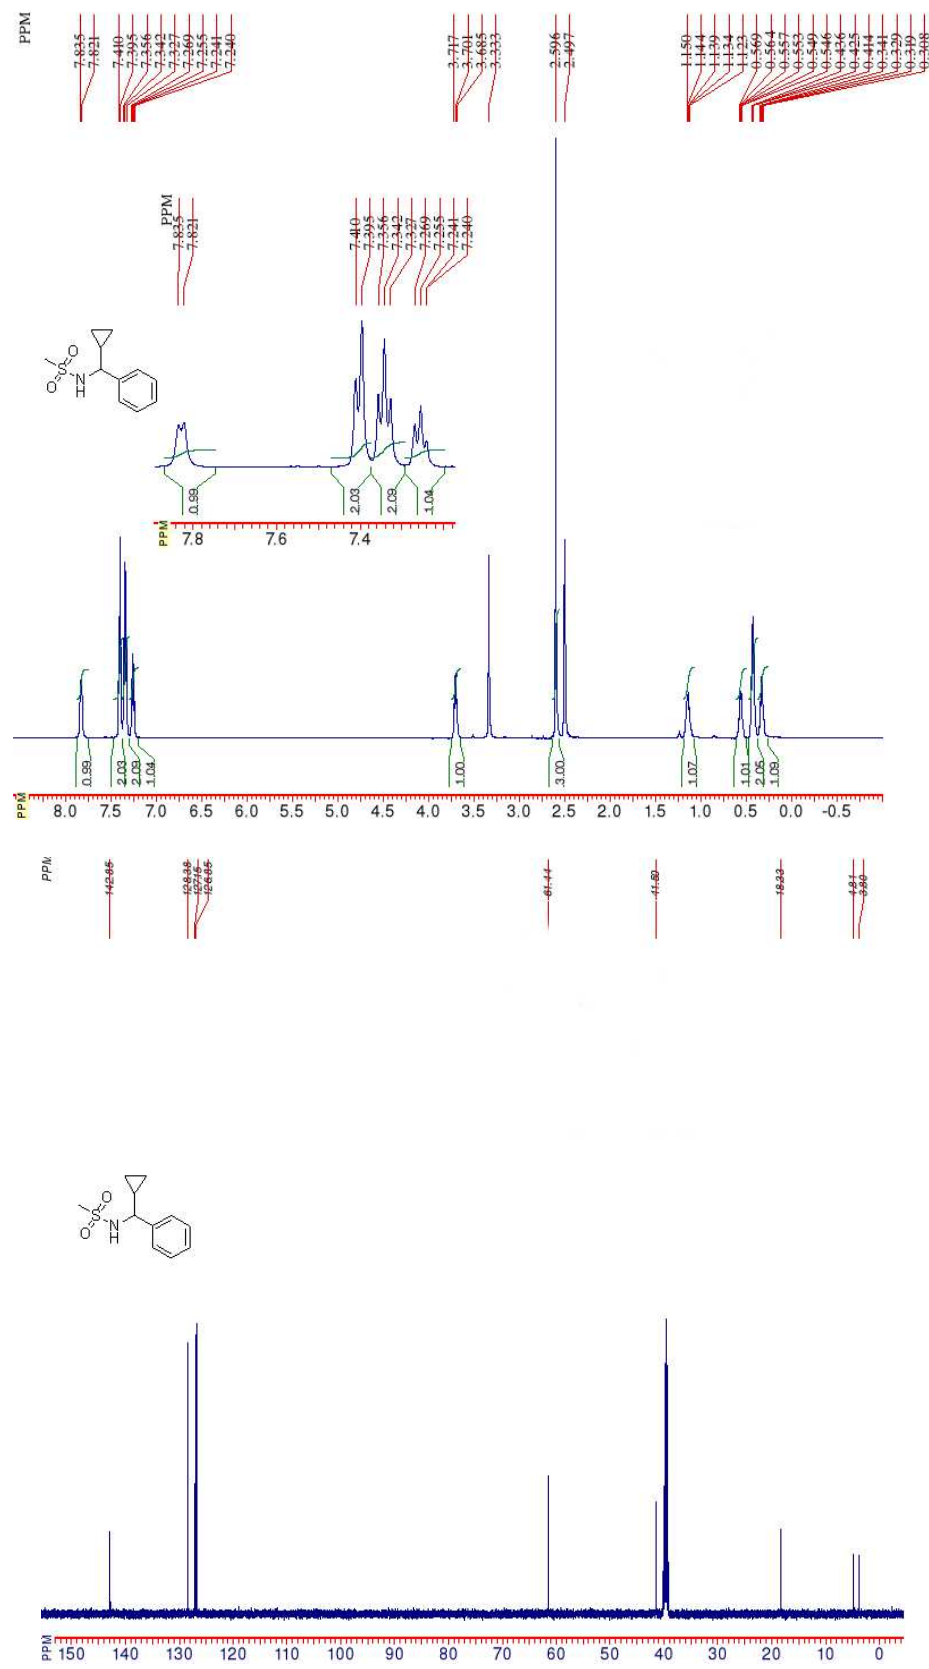

Figure S51

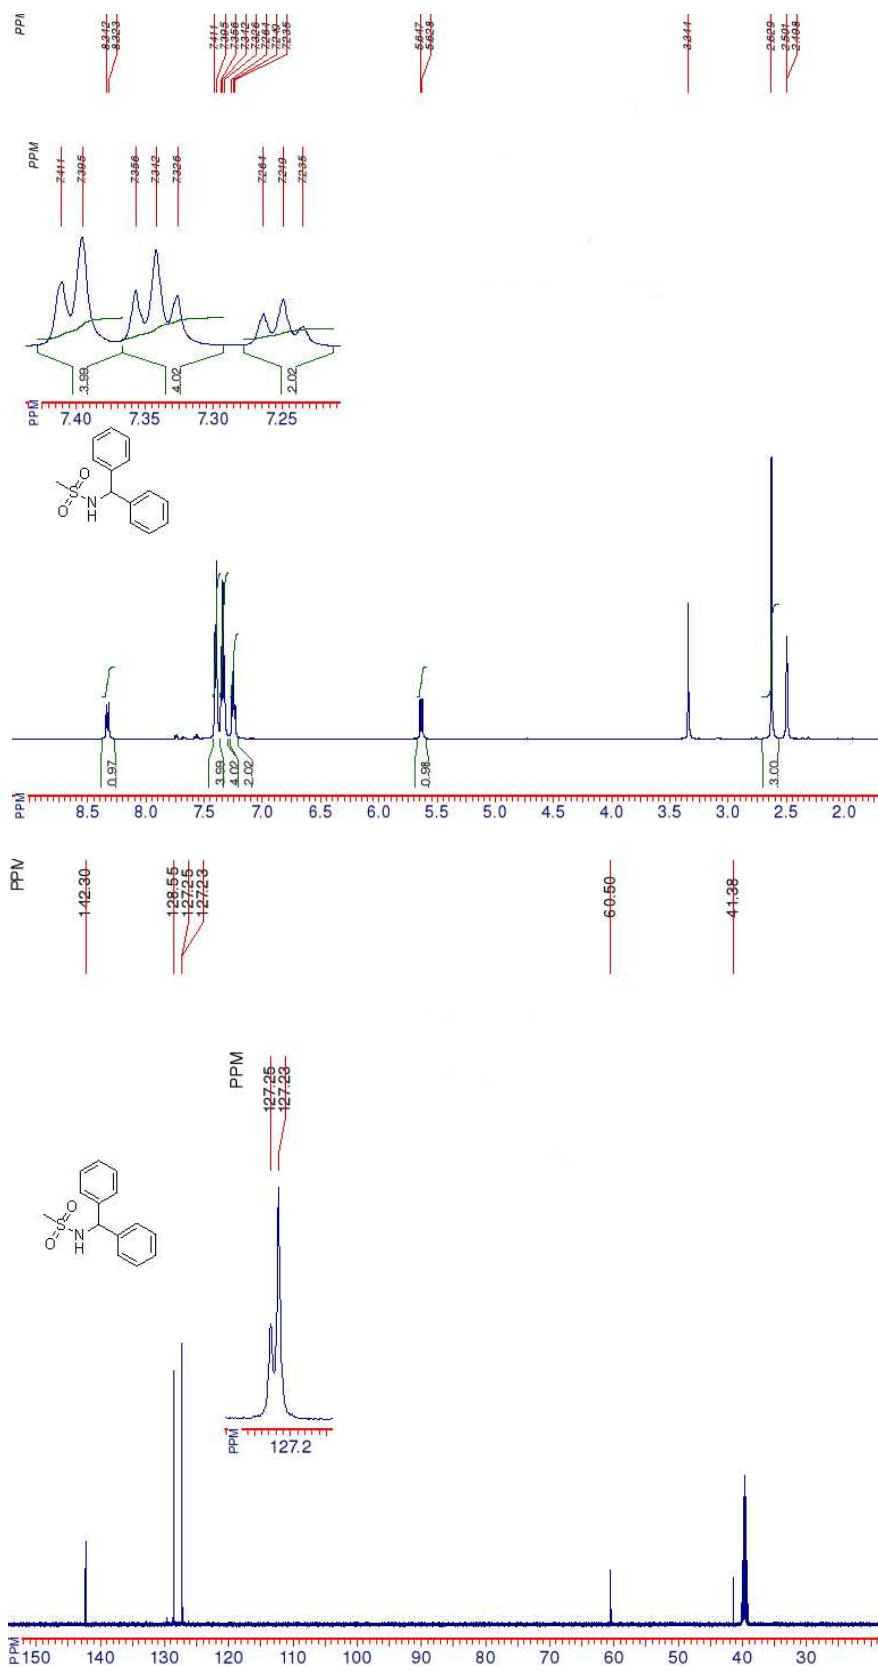

Figure S52

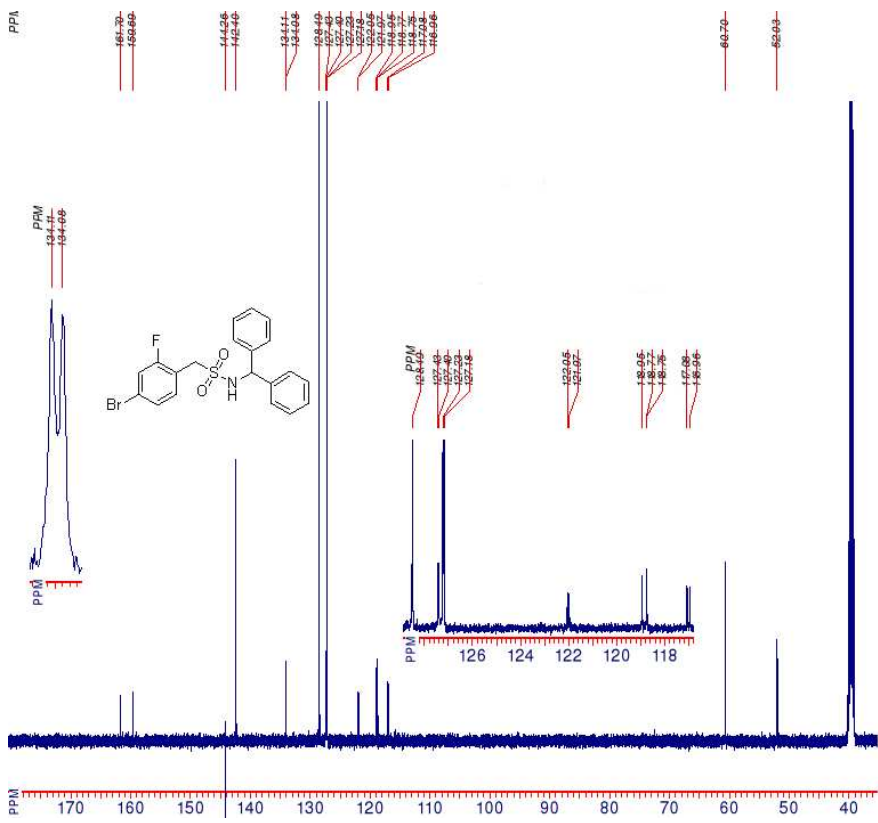

S56



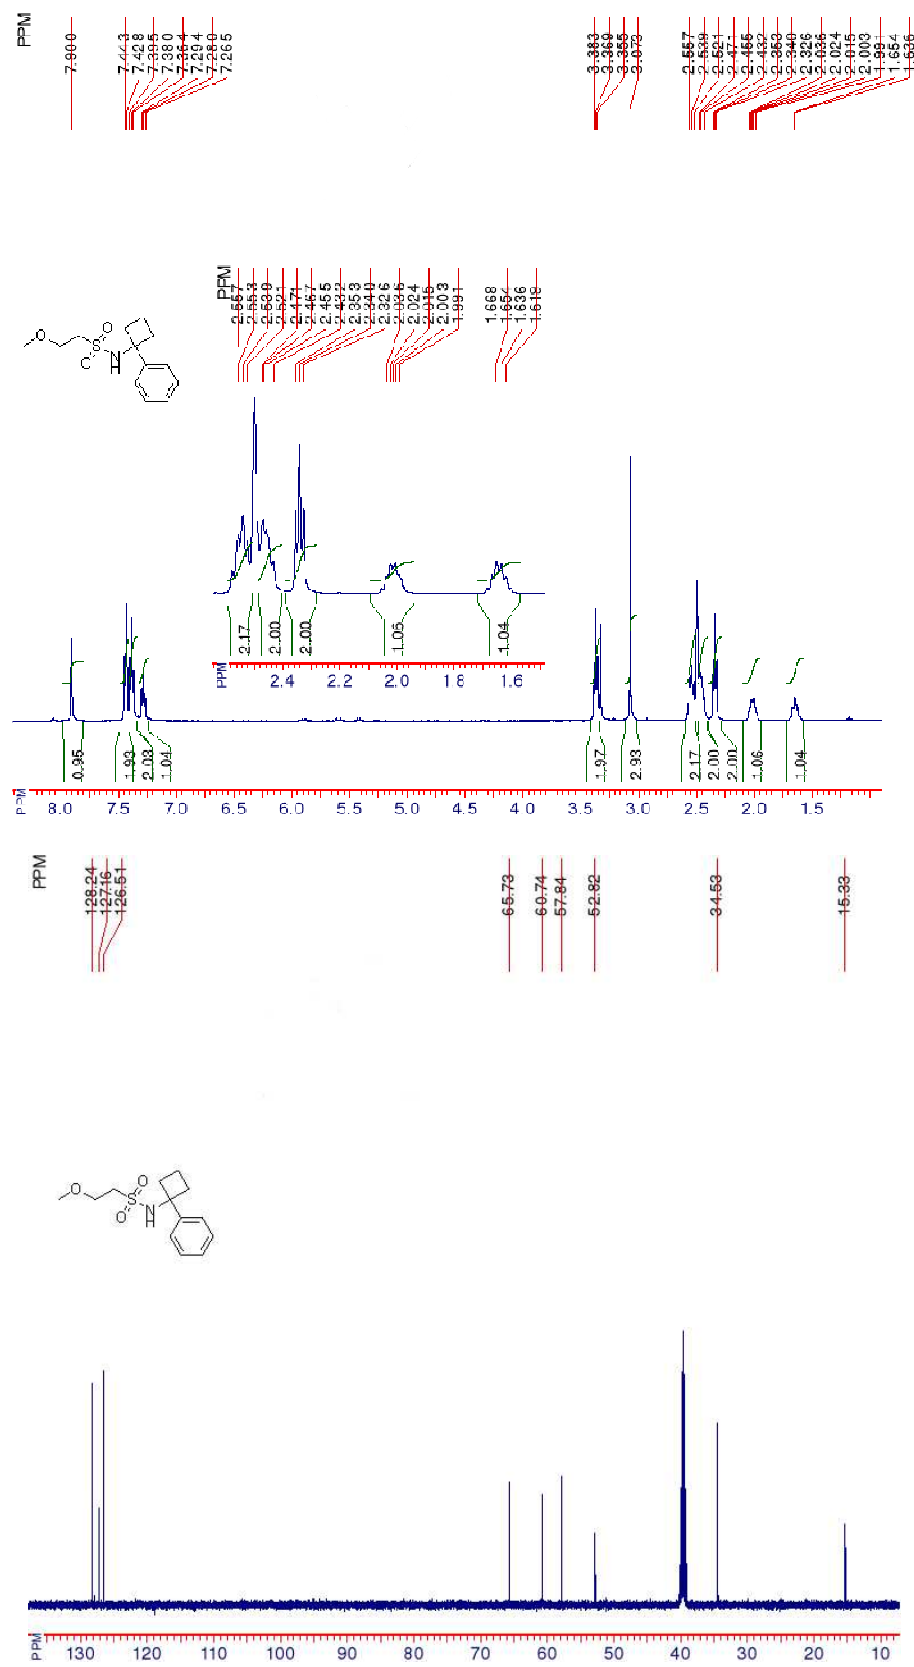

Figure S54

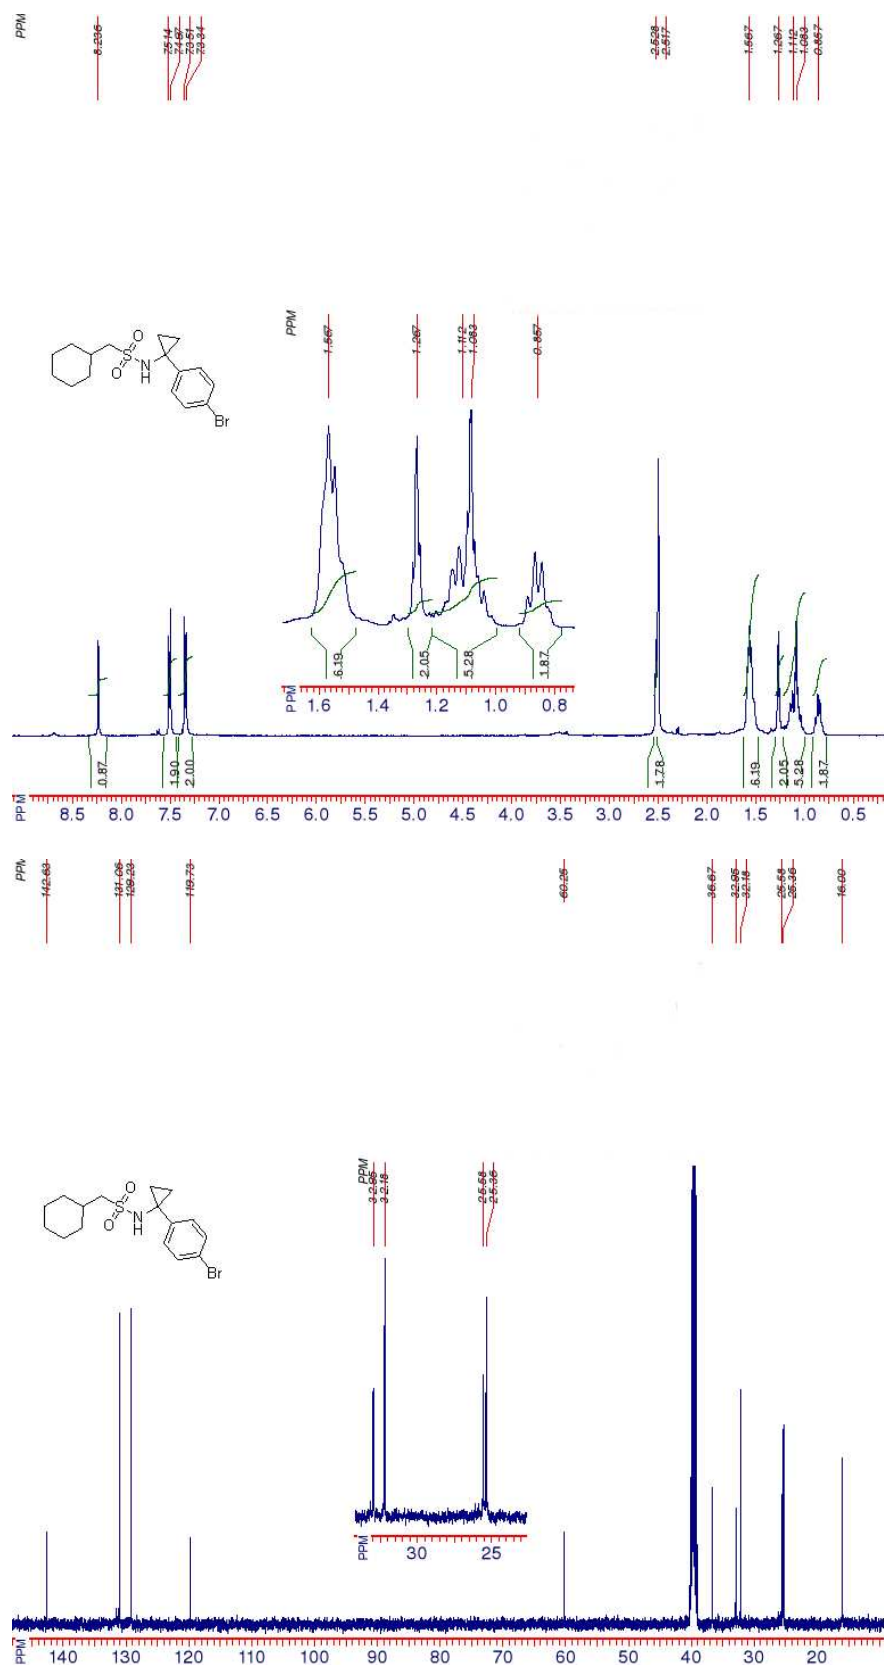

Figure S55
